# Supplementary material for: Ontogeny of the elemental composition and the biomechanics of radular teeth in the chiton Lepidochitona cinerea
Source: PubMed Central journal article supplement (PMC9188181; doi:10.1186/s12983-022-00465-w), 2022-06-11
Supplement: 12983_2022_465_MOESM1_ESM.pdf [file 12983_2022_465_MOESM1_ESM.pdf]

## Supplementary data

### **Ontogeny of the elemental composition and the biomechanics of radular teeth in the chiton *Lepidochitona cinerea***

**Wencke Krings<sup>1,2,3\*</sup>, Jan-Ole Brütt<sup>1,2</sup>, Stanislav N. Gorb<sup>3</sup>**

<sup>1</sup> Department of Behavioral Biology, Institute of Cell and Systems Biology of Animals, Universität Hamburg, Martin-Luther-King-Platz 3, 20146 Hamburg, Germany

<sup>2</sup> Department of Mammalogy and Palaeoanthropology, Leibniz Institute for the Analysis of Biodiversity Change, Martin-Luther-King-Platz 3, 20146 Hamburg, Germany

<sup>3</sup> Department of Functional Morphology and Biomechanics, Zoological Institute, Christian-Albrechts-Universität zu Kiel, Am Botanischen Garten 9, 24118 Kiel, Germany

\*corresponding author: [wencke.krings@uni-hamburg.de](mailto:wencke.krings@uni-hamburg.de)

# 1. Additional figures:

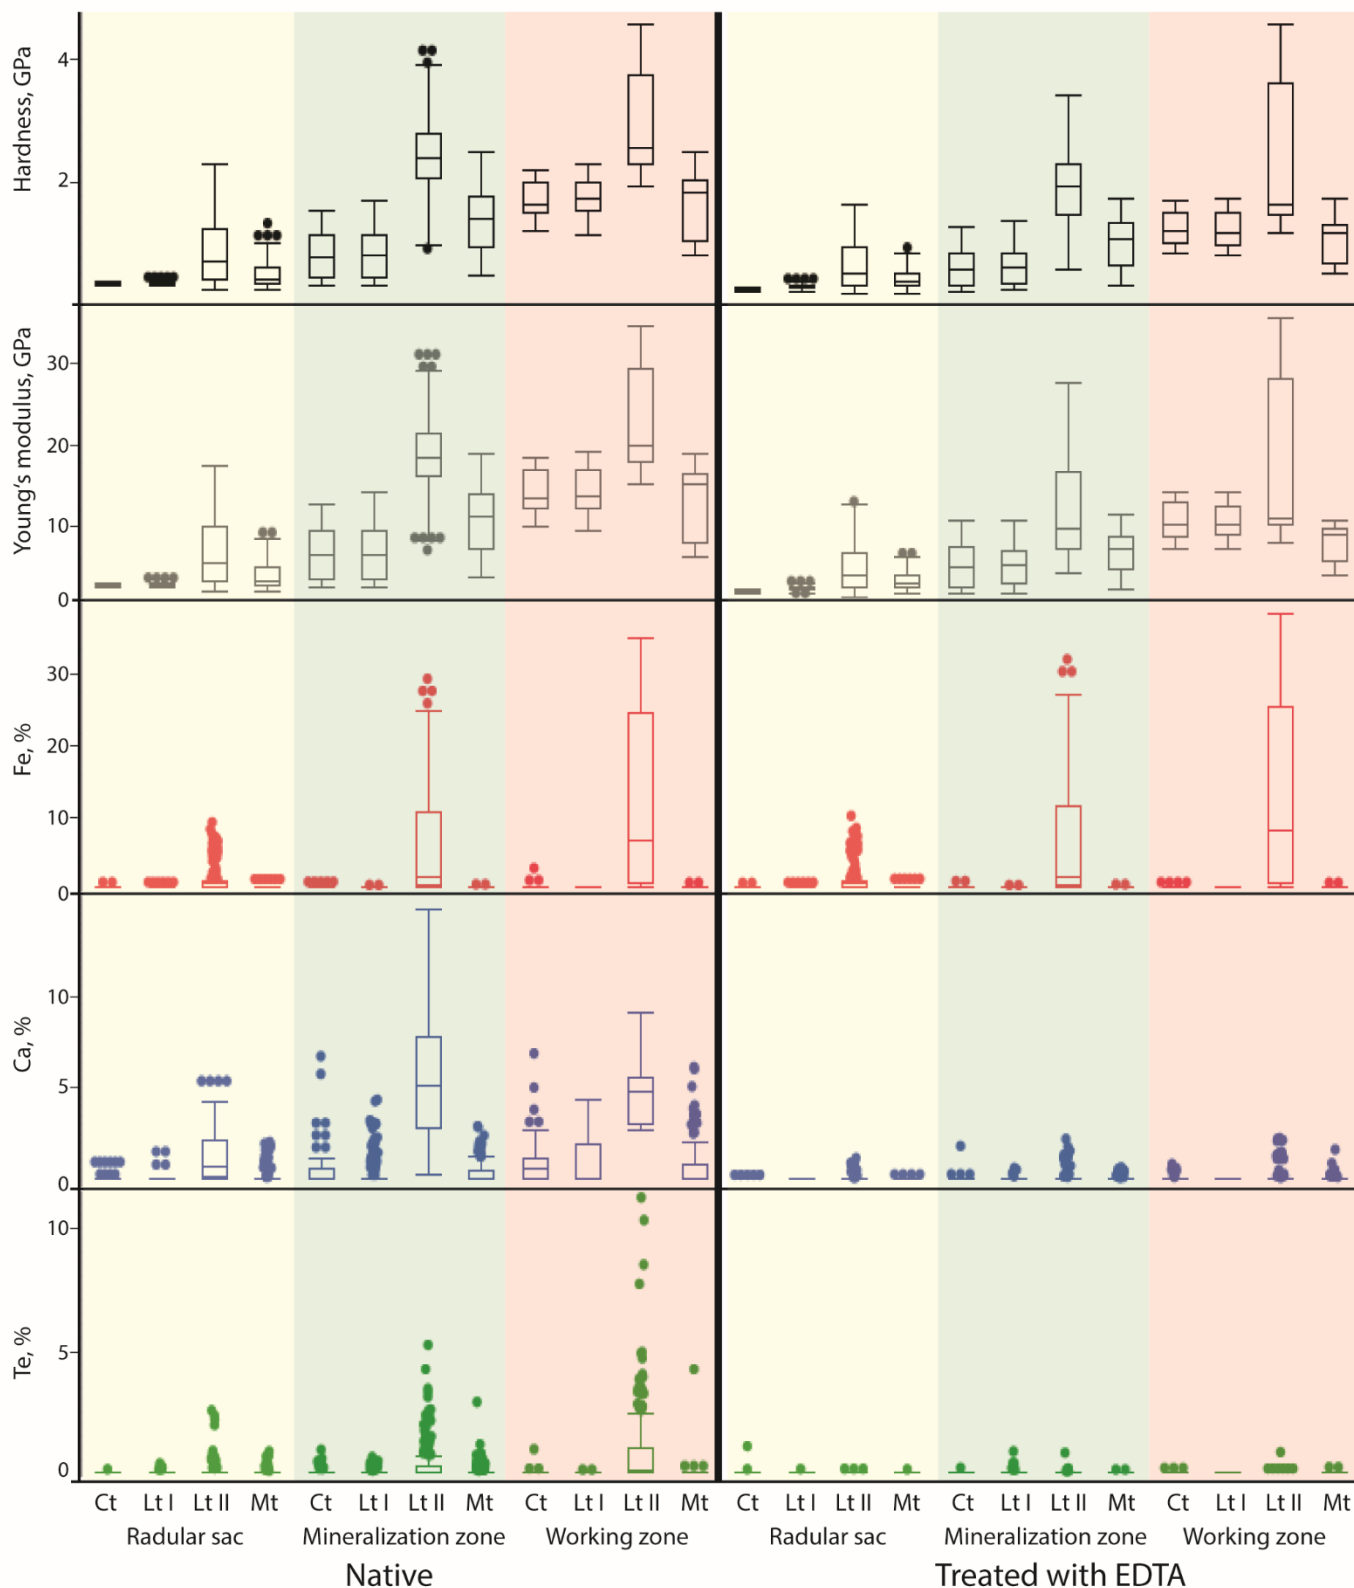

**Supplementary Figure 1.** For each tooth type (Ct, central tooth; Lt I, lateral tooth I; Lt II, lateral tooth II; Mt, marginal tooth) and each zone: Hardness, GPa, Young's moduli, GPa, and Fe, Ca, and Te ('trace elements') as proportion, %. Left side: native radulae, right side: treated radulae.

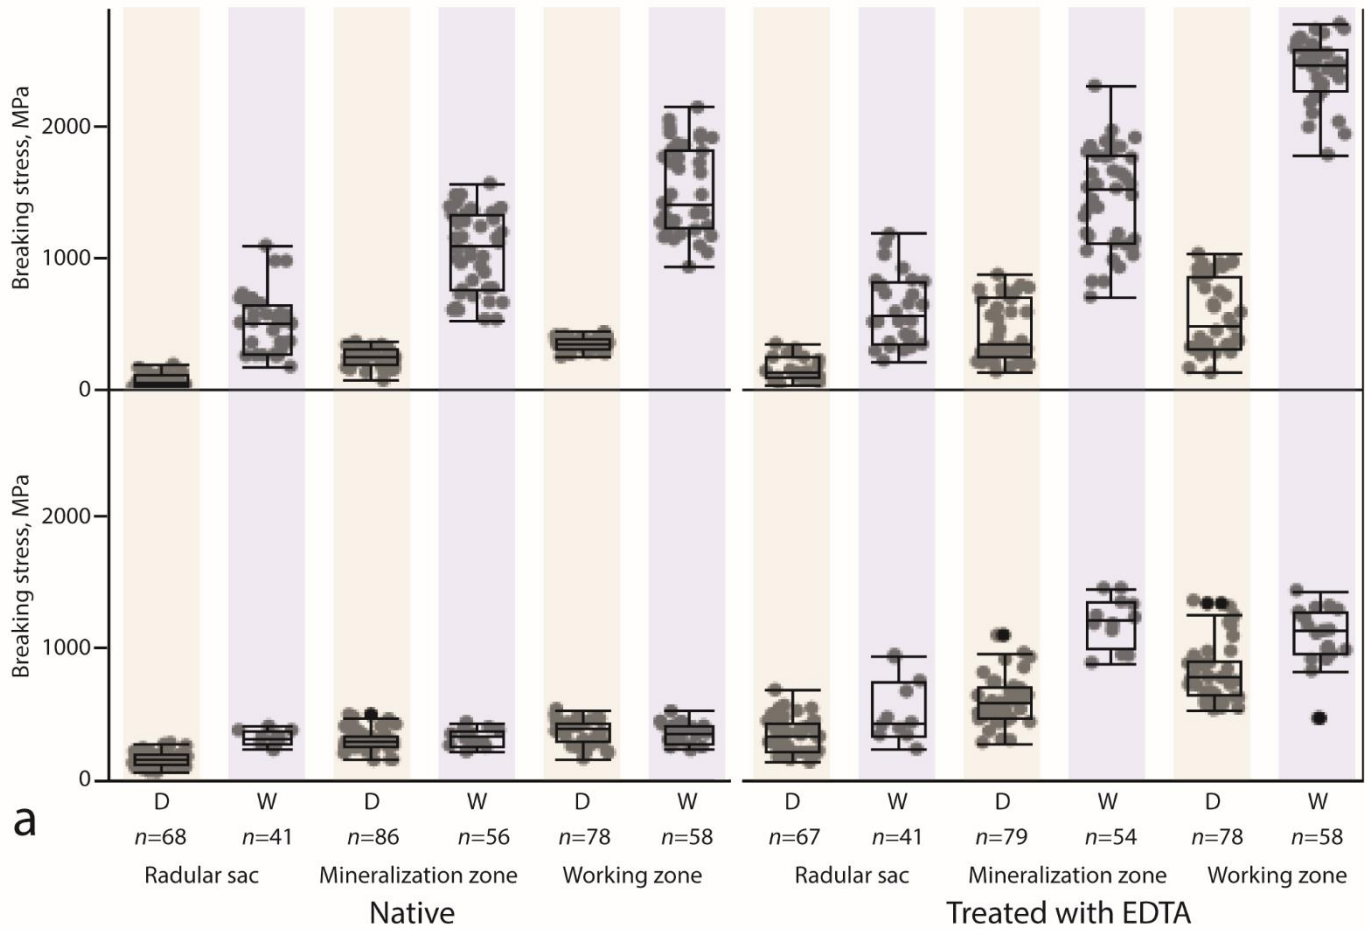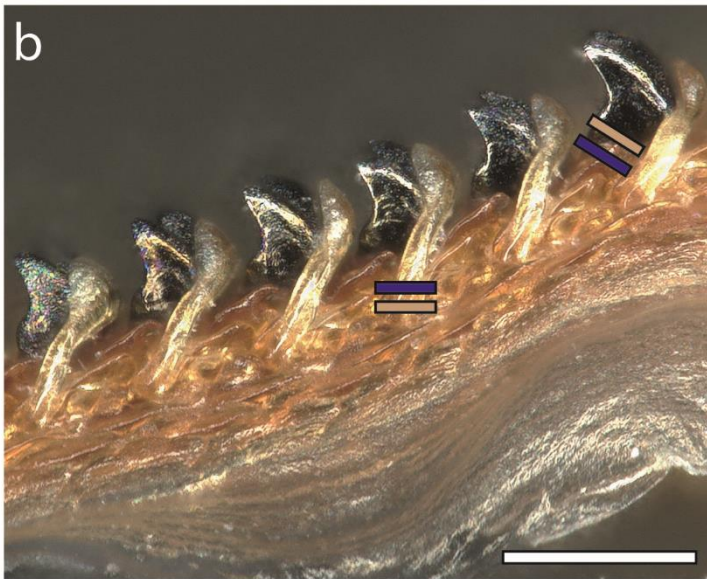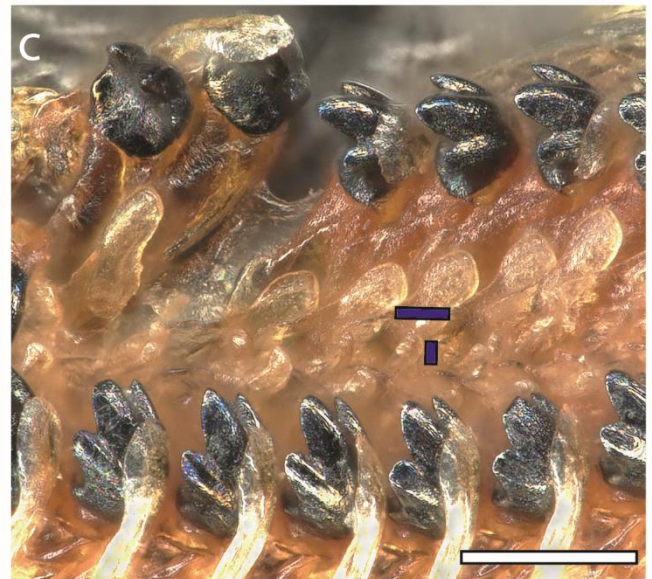

**Supplementary Figure 2.** a. Calculated breaking stress (breaking force/area), given in MPa, for each radular zone and condition (native dry, native wet, treated dry, treated wet) with quantity ( $n$ ) of broken teeth that were used for calculation. Brown colour highlight the results obtained by testing dry teeth and blue the results obtained from testing wet teeth. b–c. Region of structural failure under dry (brown) or wet condition (blue). Scale bars: b–c = 100  $\mu$ m. D, dry; W, wet.

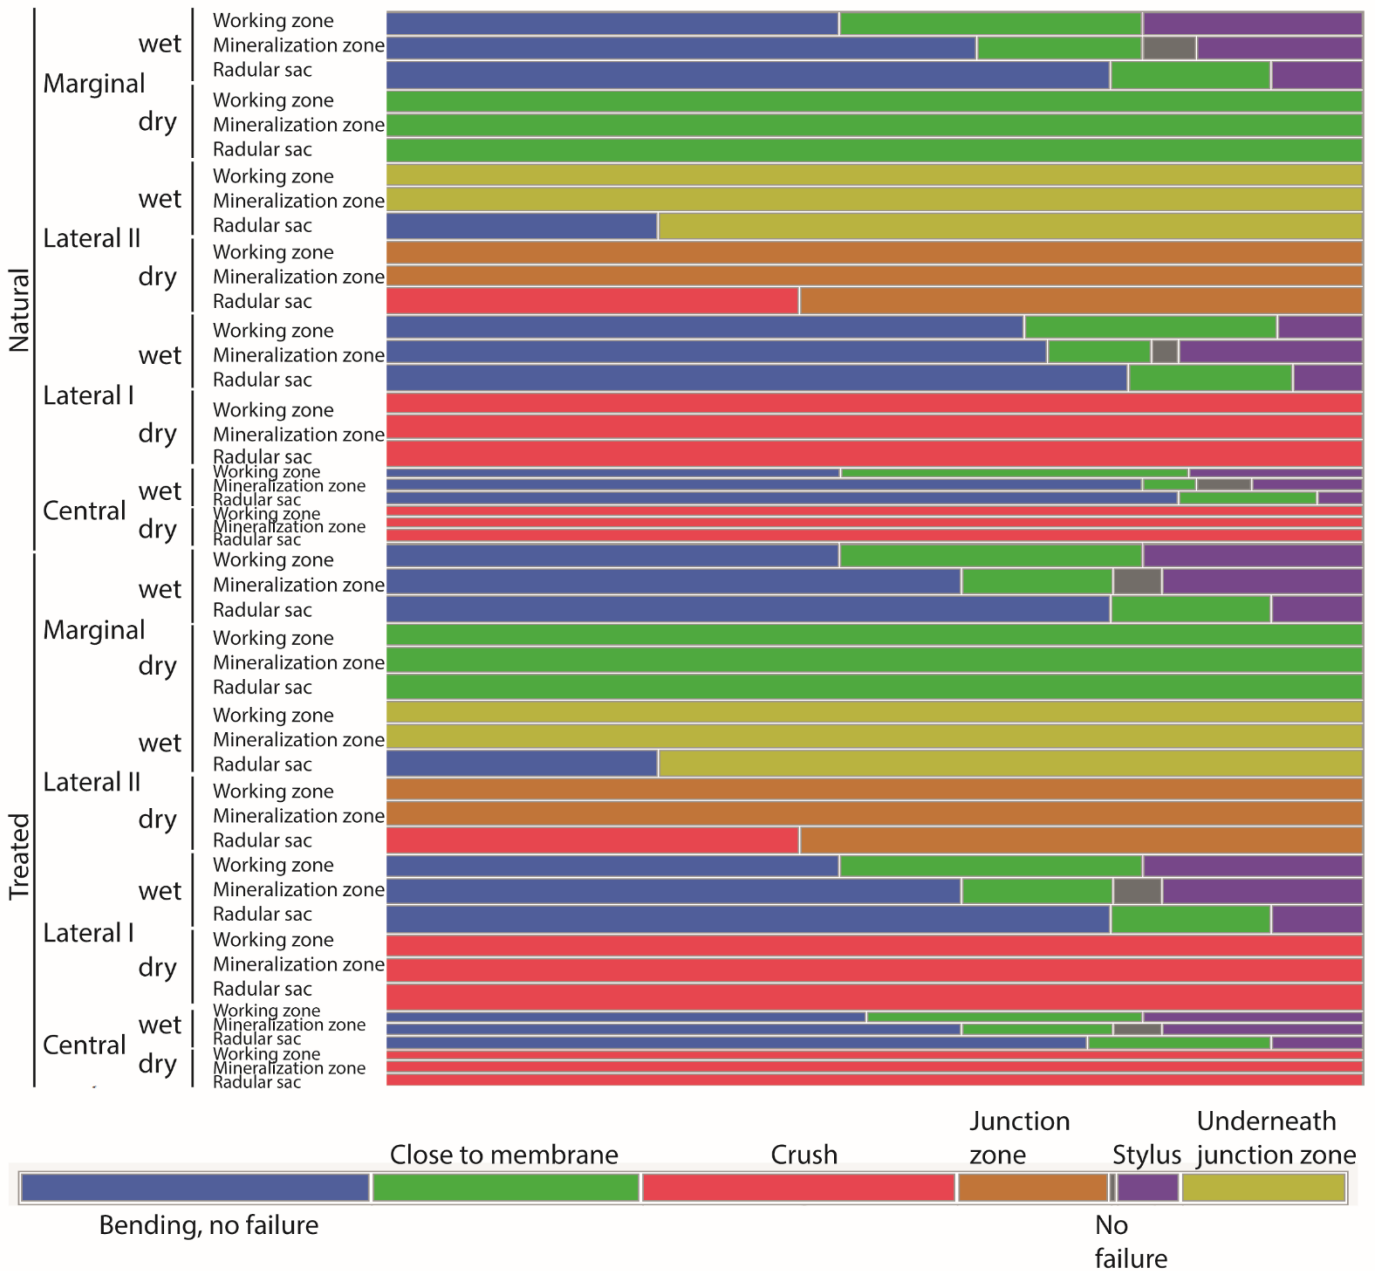

**Supplementary Figure 3.** Percentage of different failure types (sorted to the area, where failure occurred) of each tooth type during breaking stress experiments. Sorted to radular zone, native and treated, tested under dry or wet condition.

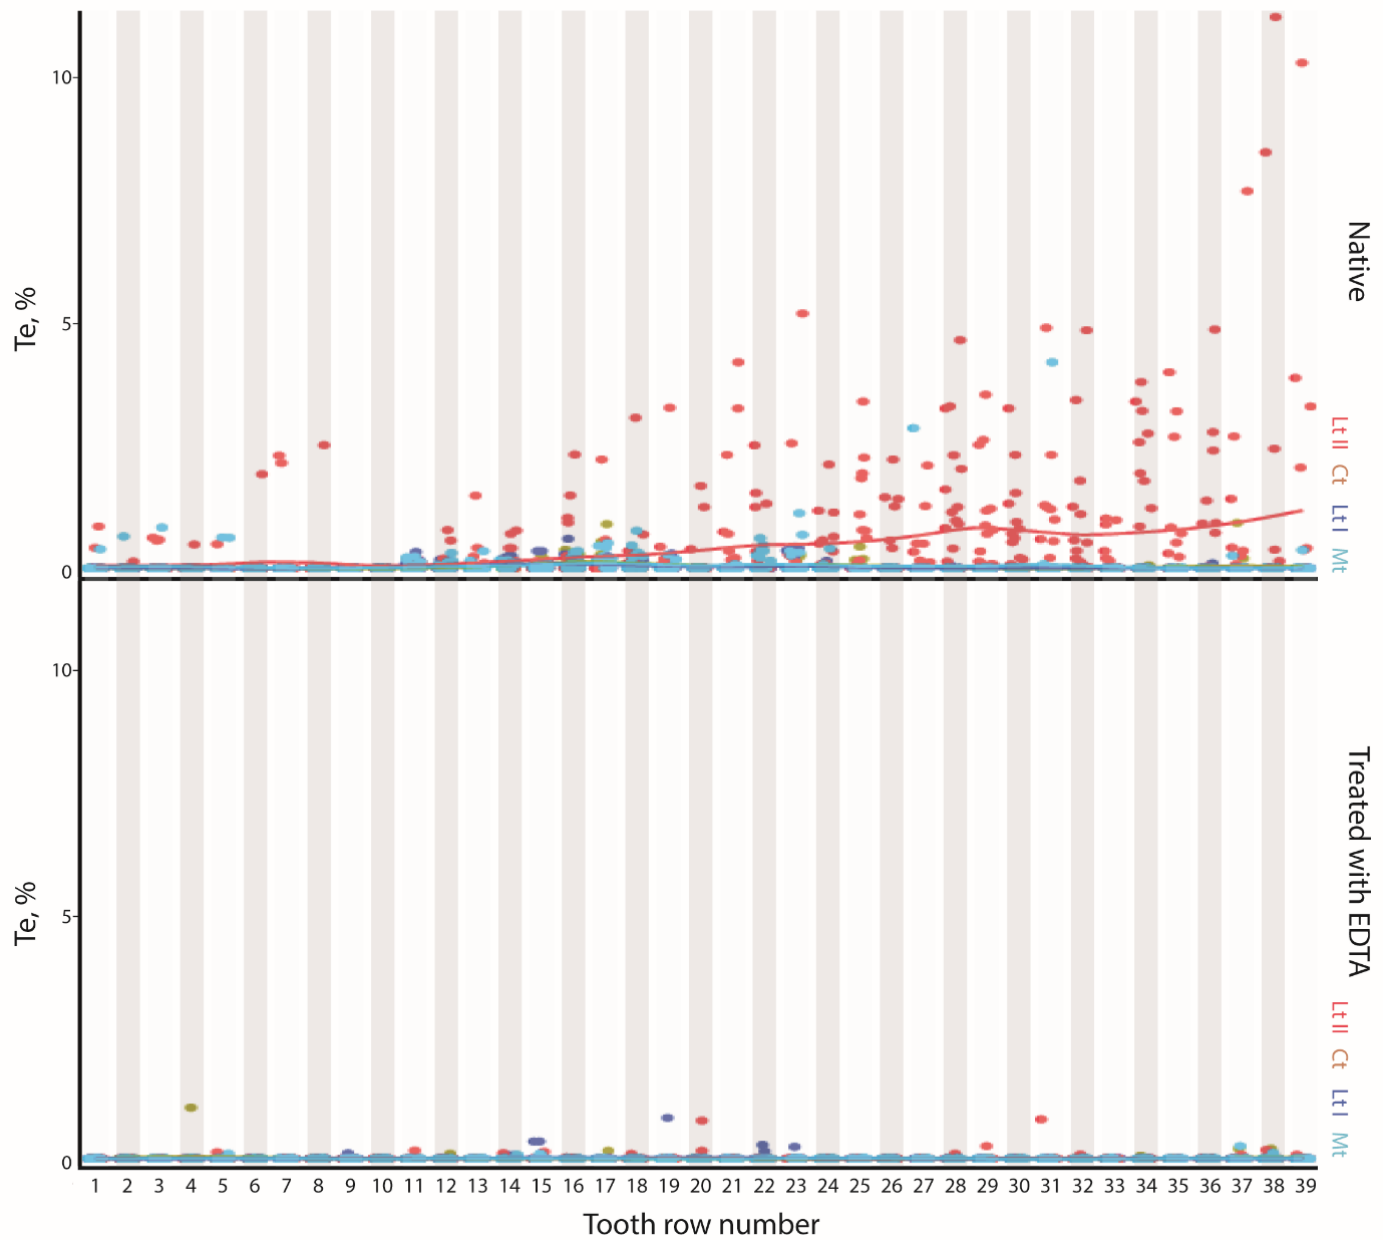

**Supplementary Figure 4.** Changes in proportion of Te ('trace elements'), %, during ontogeny for each tooth type (Ct, central tooth; Lt I, lateral tooth I; Lt II, lateral tooth II; Mt, marginal tooth); values and trend lines for native (above) and treated (below) radulae.

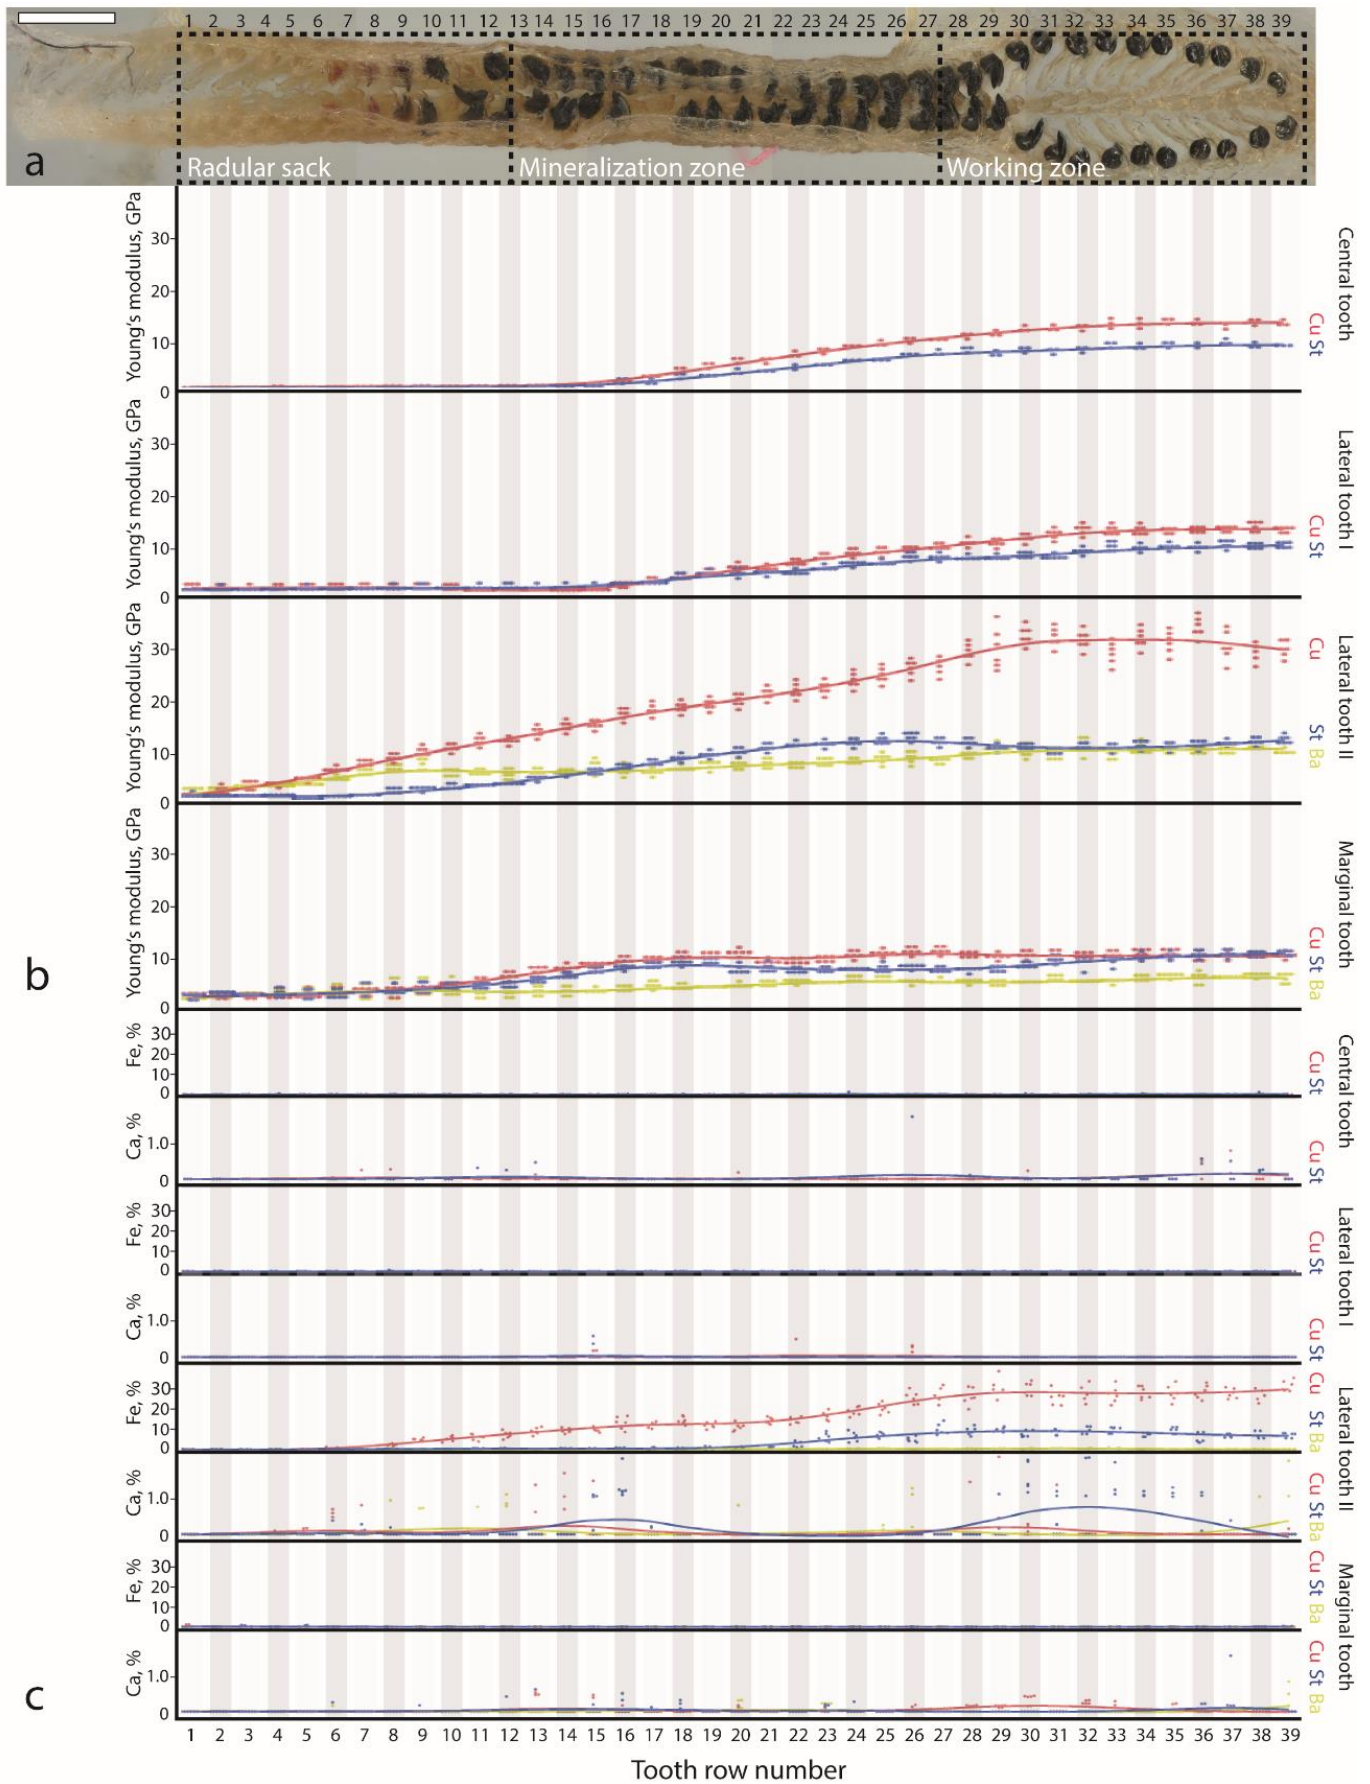

**Supplementary Figure 5.** EDX and nanoindentation data obtained from treated radulae ( $n = 3$ ). a. Light microscopy images of one radula, tooth rows are numbered, and the zones (radular sack, mineralization zone, working zone) are defined. b. Changes in Young's modulus, GPa, during ontogeny for each tooth type and tooth part (Cu, cusp; St, stylus, Ba, basis). c. Changes in Fe and Ca proportions (%) during ontogeny for each tooth type and tooth part. Dots show values measured and solid lines show trend lines based on the individual measurements. Scale bar: A = 200  $\mu$ m.



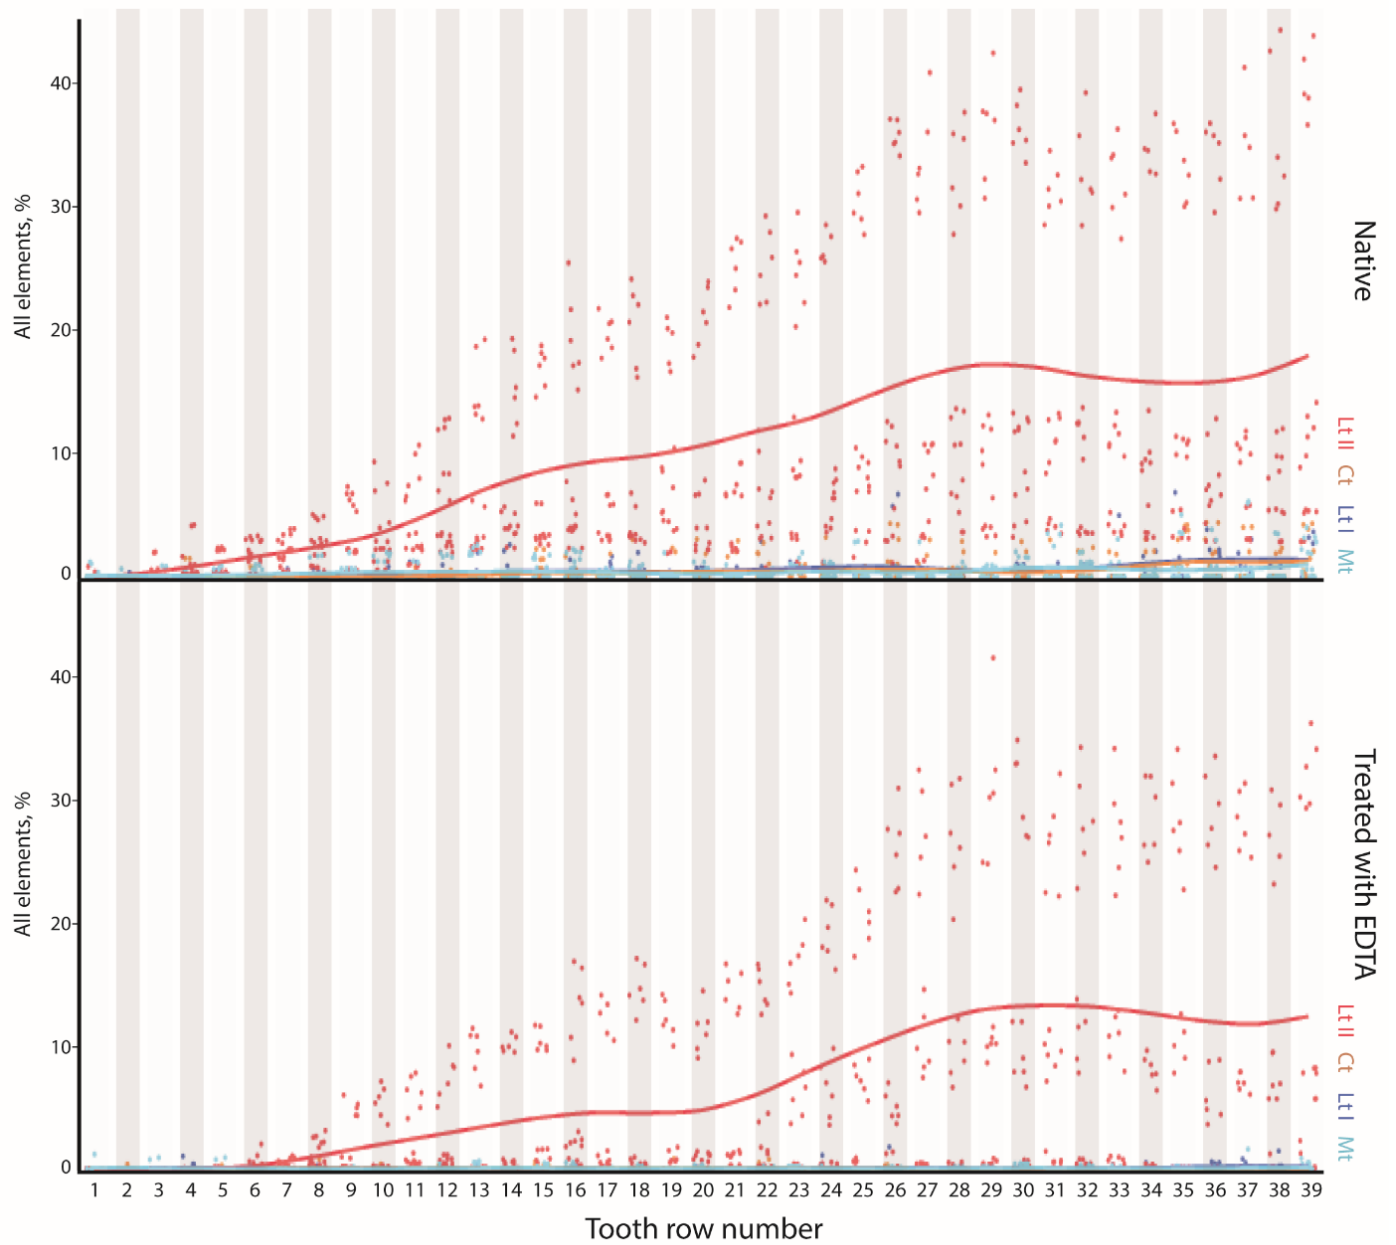

**Supplementary Figure 6.** Changes in proportion of all elements, %, during ontogeny for each tooth type (Ct, central tooth; Lt I, lateral tooth I; Lt II, lateral tooth II; Mt, marginal tooth); values and trend lines for native (above) and treated (below) radulae.

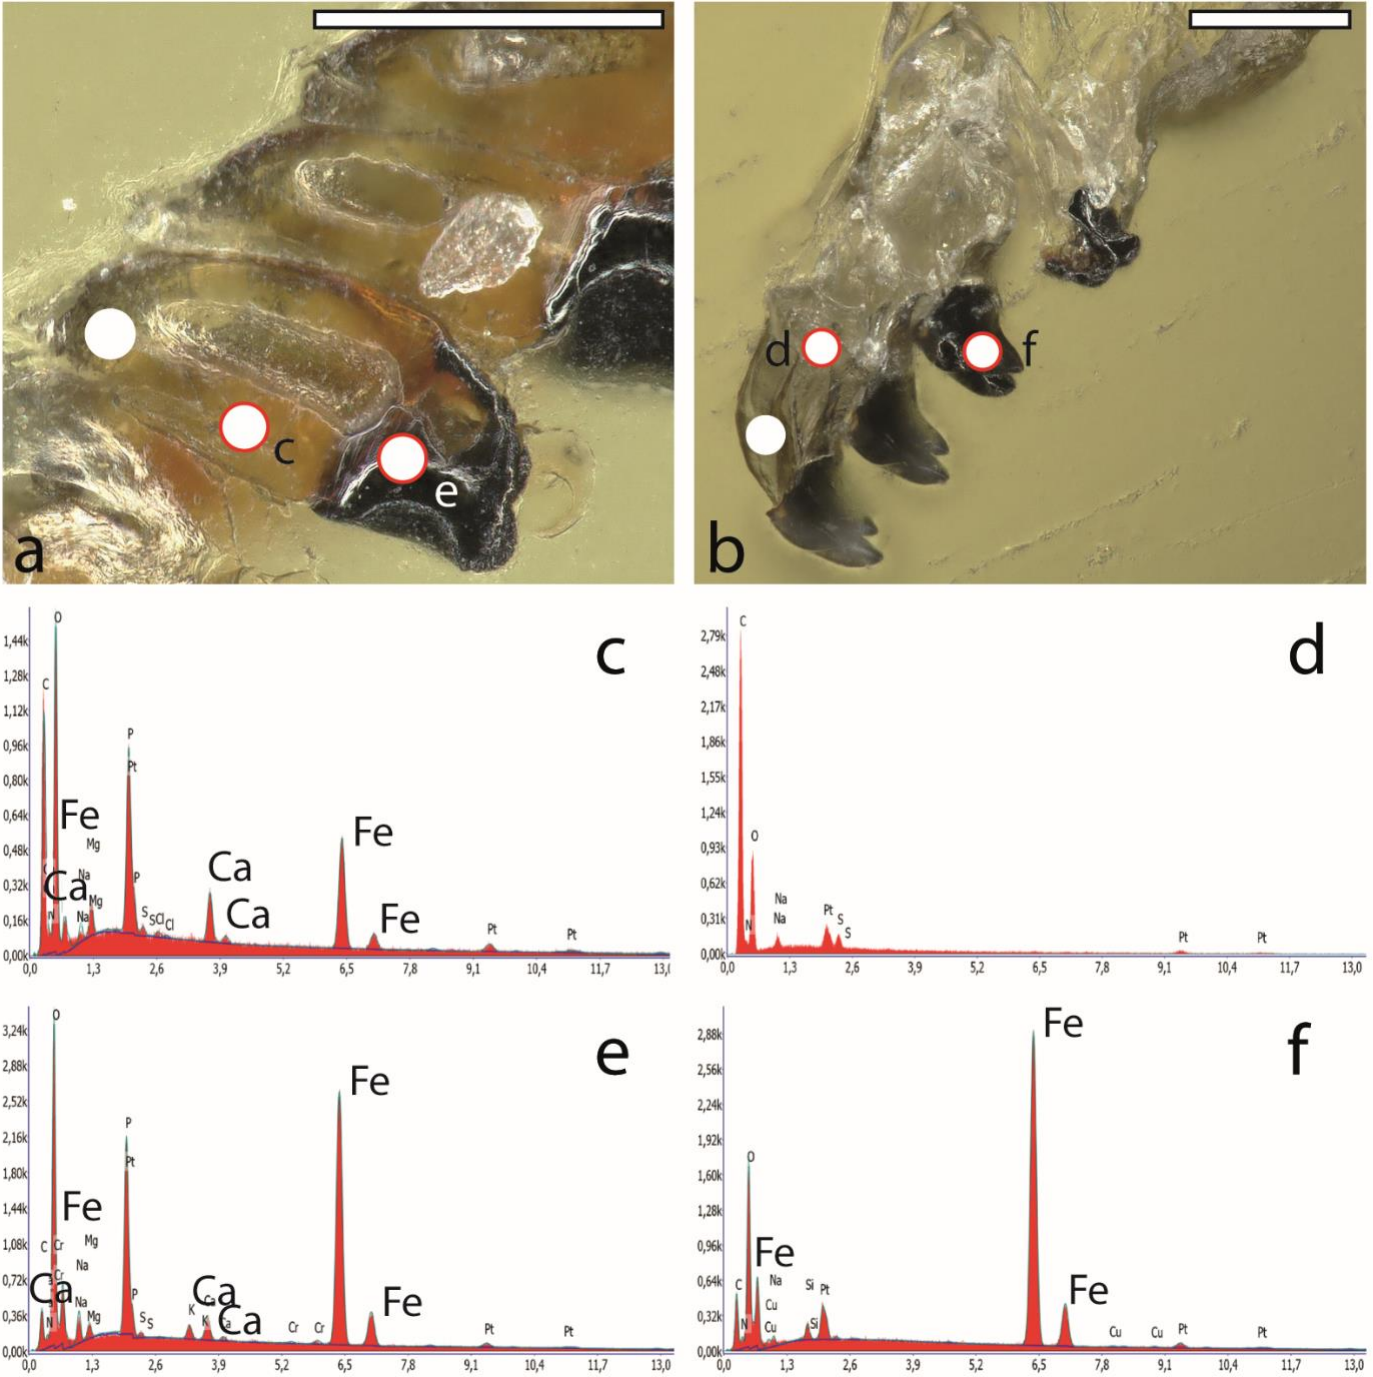

**Supplementary Figure 7.** Embedded and polished samples, images obtained by light microscopy, and corresponding EDX spectra (the circles indicate the area of EDX analysis: basis, stylus, cusp). a. Lateral teeth II, working zone of the native radula from specimen number 2. b. Lateral teeth II, working zone of the treated radula from specimen number 1. c. EDX spectrum of the native stylus. d. EDX spectrum of the treated basis. e. EDX spectrum of the native cusp. f. EDX spectrum of the treated cusp. Scale bars: a–b = 100  $\mu$ m.



## 2. Tables including raw data and statistics:

**Supplementary Table 1.** For every individual whole radula. Mean, standard deviation (Sd), and quantity (*n*) of analysed tooth areas (by EDX and nanoindentation) or quantity of broken teeth (by breaking stress experiments) for the following parameters are given: (a) proportions, given in %, of Na, Mg, Si, P, S, Cl, K, Ca, Fe, and all elements. Differences between the individual radulae for each condition (native or treated) were tested by Kruskal-Wallis test (orange p-values = highly significant). (b) Young's modulus (*E*) and hardness (*H*), given in GPa. Differences between the individual radulae for each condition (native or treated) were tested by ANOVA (red p-values = significant). (c) Breaking force (*Bf*), given in mN, and breaking stress (*Bs*), given in MPa. Differences between the individual radulae for each condition (native dry, native wet, treated dry, or treated wet) were tested by t test (black p-values = not significant).

| Parameter    | Condition   | Individual 1 |        |          | Individual 2 |        |          | Individual 3 |      |          | Results from Kruskal-Wallis |          |         |
|--------------|-------------|--------------|--------|----------|--------------|--------|----------|--------------|------|----------|-----------------------------|----------|---------|
|              |             | Mean         | Sd     | <i>n</i> | Mean         | Sd     | <i>n</i> | Mean         | Sd   | <i>n</i> | ChiSquare                   | df       | p-value |
| Na           | Native      | 0.03         | 0.23   | 687      | 0.04         | 0.29   | 695      | 0.03         | 0.22 | 692      | 0.5871                      | 2        | 0.7456  |
| Mg           | Native      | 0.02         | 0.14   | 687      | 0.02         | 0.15   | 695      | 0.02         | 0.15 | 692      | 0.9639                      | 2        | 0.6176  |
| Si           | Native      | 0.00         | 0.01   | 687      | 0.00         | 0.01   | 695      | 0.00         | 0.00 | 692      | 9.5023                      | 2        | 0.0086* |
| P            | Native      | 0.09         | 0.47   | 687      | 0.07         | 0.44   | 695      | 0.09         | 0.09 | 692      | 1.1567                      | 2        | 0.5608  |
| S            | Native      | 0.02         | 0.08   | 687      | 0.02         | 0.08   | 695      | 0.02         | 0.08 | 692      | 0.0997                      | 2        | 0.9514  |
| Cl           | Native      | 0.01         | 0.05   | 687      | 0.00         | 0.02   | 695      | 0.00         | 0.03 | 692      | 0.6350                      | 2        | 0.7280  |
| K            | Native      | 0.00         | 0.02   | 687      | 0.00         | 0.02   | 695      | 0.00         | 0.05 | 692      | 4.3273                      | 2        | 0.1149  |
| Ca           | Native      | 1.55         | 2.33   | 687      | 1.53         | 2.40   | 695      | 1.51         | 2.39 | 692      | 0.1154                      | 2        | 0.9439  |
| Fe           | Native      | 1.99         | 5.86   | 687      | 1.94         | 5.77   | 695      | 1.95         | 5.85 | 692      | 0.2894                      | 2        | 0.8653  |
| All elements | Native      | 3.69         | 7.93   | 687      | 3.63         | 7.95   | 695      | 3.62         | 7.91 | 692      | 0.0692                      | 2        | 0.9660  |
| Na           | Treated     | 0.00         | 0.03   | 684      | 0.00         | 0.00   | 694      | 0.00         | 0.00 | 690      | 1.0093                      | 2        | 0.6037  |
| Mg           | Treated     | 0.00         | 0.04   | 684      | 0.00         | 0.00   | 694      | 0.00         | 0.01 | 690      | 1.0093                      | 2        | 0.6037  |
| Si           | Treated     | 0.00         | 0.00   | 684      | 0.00         | 0.00   | 694      | 0.00         | 0.00 | 690      | 1.9827                      | 2        | 0.3711  |
| P            | Treated     | 0.00         | 0.04   | 684      | 0.00         | 0.00   | 694      | 0.00         | 0.00 | 690      | 4.0546                      | 2        | 0.1317  |
| S            | Treated     | 0.00         | 0.01   | 684      | 0.00         | 0.00   | 694      | 0.00         | 0.01 | 690      | 4.7708                      | 2        | 0.0921  |
| Cl           | Treated     | 0.00         | 0.01   | 684      | 0.00         | 0.01   | 694      | 0.00         | 0.02 | 690      | 0.4275                      | 2        | 0.8076  |
| K            | Treated     | 0.00         | 0.01   | 684      | 0.00         | 0.02   | 694      | 0.00         | 0.01 | 690      | 0.6411                      | 2        | 0.7258  |
| Ca           | Treated     | 0.05         | 0.22   | 684      | 0.05         | 0.22   | 694      | 0.06         | 0.25 | 690      | 0.5467                      | 2        | 0.7608  |
| Fe           | Treated     | 2.13         | 6.17   | 684      | 2.17         | 6.25   | 694      | 2.20         | 6.39 | 690      | 0.5042                      | 2        | 0.7772  |
| All elements | Treated     | 2.18         | 6.20   | 684      | 2.23         | 6.27   | 694      | 2.26         | 6.42 | 690      | 0.8869                      | 2        | 0.6418  |
|              |             |              |        |          |              |        |          |              |      |          | Results from ANOVA          |          |         |
|              |             |              |        |          |              |        |          |              |      |          | F Ratio                     | df       | p-value |
| H            | Native      | 1.41         | 0.96   | 687      | 1.48         | 0.98   | 695      | 1.33         | 0.90 | 692      | 4.5207                      | 2        | 0.0110* |
| E            | Native      | 11.20        | 7.49   | 687      | 11.72        | 7.59   | 695      | 10.52        | 6.96 | 692      | 4.6125                      | 2        | 0.0100* |
| H            | Treated     | 1.05         | 0.80   | 684      | 1.11         | 0.83   | 694      | 1.00         | 0.77 | 690      | 3.5028                      | 2        | 0.0303* |
| E            | Treated     | 7.80         | 5.99   | 684      | 8.14         | 6.17   | 694      | 7.46         | 5.73 | 690      | 2.2726                      | 2        | 0.1033  |
|              |             |              |        |          |              |        |          |              |      |          | Results from t test         |          |         |
|              |             | Individual 4 |        |          | Individual 5 |        |          |              |      |          | t ratio                     | df       | p-value |
|              |             | Mean         | Sd     | <i>n</i> | Mean         | Sd     | <i>n</i> |              |      |          |                             |          |         |
| Bf           | Native dry  | 174.51       | 207.49 | 223      | 160.68       | 196.00 | 224      |              |      |          | -0.72472                    | 443.3292 | 0.7655  |
| Bf           | Native wet  | 467.09       | 411.37 | 115      | 436.53       | 385.06 | 106      |              |      |          | -0.5705                     | 218.9456 | 0.7155  |
| Bs           | Native dry  | 277.64       | 116.07 | 112      | 240.35       | 110.21 | 120      |              |      |          | -2.50584                    | 226.6855 | 0.9935  |
| Bs           | Native wet  | 948.32       | 601.83 | 79       | 753.84       | 422.26 | 76       |              |      |          | -2.33601                    | 140.0989 | 0.9895  |
| Bf           | Treated dry | 116.20       | 143.46 | 216      | 79.84        | 75.68  | 217      |              |      |          | -3.29606                    | 325.7227 | 0.9995  |
| Bf           | Treated wet | 598.14       | 532.97 | 103      | 564.10       | 497.93 | 97       |              |      |          | -0.46696                    | 197.9883 | 0.6795  |
| Bs           | Treated dry | 617.32       | 284.14 | 108      | 399.47       | 221.08 | 116      |              |      |          | -6.37196                    | 201.9238 | 1.0000  |
| Bs           | Treated wet | 1387.87      | 735.62 | 78       | 1392.48      | 717.84 | 75       |              |      |          | 0.039224                    | 150.966  | 0.4844  |

**Supplementary Table 2.** For each condition. Mean, standard deviation (Sd), and quantity (*n*) of analysed tooth areas (by EDX and nanoindentation) or quantity of broken teeth (by breaking stress experiments) for the following parameters are given: (a) proportions, given in %, of Na, Mg, Si, P, S, Cl, K, Ca, Fe, and all elements. Differences between the individual radulae for each condition (native or treated) were tested by Kruskal-Wallis test (orange p-values = highly significant, red = significant). (b) Young's modulus (E) and hardness (H), given in GPa. Differences between the individual radulae for each condition (native or treated) were tested by Wilcoxon test (orange p-values = highly significant). (c) Breaking force, given in mN, and breaking stress, given in MPa. Differences between the conditions (native, treated, native dry, native wet, treated dry, or treated wet) were tested by t test or ANOVA (orange p-values = highly significant).

| Parameter       | Mean ± Sd                  |                             |                            |                             | Wilcoxon test |          |          |
|-----------------|----------------------------|-----------------------------|----------------------------|-----------------------------|---------------|----------|----------|
|                 | Native                     | Treated                     |                            | ChiSquare                   | df            | p-value  |          |
| All elements    | 3.65 ± 7.93                | 2.22 ± 6.29                 |                            | 259.6057                    | 1             | < 0.0001 |          |
| Fe              | 1.96 ± 5.82                | 2.16 ± 6.26                 |                            | 0.0101                      | 1             | 0.9198   |          |
| K               | 0.02 ± 0.03                | 0.00 ± 0.01                 |                            | 3.0432                      | 1             | 0.0811   |          |
| Na              | 0.03 ± 0.25                | 0.00 ± 0.02                 |                            | 46.9454                     | 1             | < 0.0001 |          |
| Mg              | 0.02 ± 0.14                | 0.00 ± 0.02                 |                            | 70.4860                     | 1             | < 0.0001 |          |
| Si              | 0.00 ± 0.01                | 0.00 ± 0.00                 |                            | 13.2788                     | 1             | < 0.0003 |          |
| P               | 0.08 ± 0.46                | 0.00 ± 0.02                 |                            | 94.4597                     | 1             | < 0.0001 |          |
| S               | 0.02 ± 0.08                | 0.00 ± 0.01                 |                            | 168.1426                    | 1             | < 0.0001 |          |
| Cl              | 0.00 ± 0.03                | 0.00 ± 0.01                 |                            | 19.2699                     | 1             | < 0.0001 |          |
| Ca              | 1.53 ± 2.37                | 0.05 ± 0.23                 |                            | 938.3499                    | 1             | < 0.0001 |          |
| H               | 1.40 ± 0.95                | 1.05 ± 0.80                 |                            | 176.583                     | 1             | < 0.0001 |          |
| E               | 11.15 ± 7.36               | 7.80 ± 5.9                  |                            | 254.9487                    | 1             | < 0.0001 |          |
|                 |                            |                             |                            |                             | T test        |          |          |
|                 | Dry                        | Wet                         |                            | t                           | df            | p-value  |          |
| Breaking force  | 133.33 ± 168.70<br>n = 880 | 513.81 ± 461.61<br>n = 421  |                            | 16.39621                    | 474.4609      | < 0.0001 |          |
| Breaking stress | 379.27 ± 242.88<br>n = 456 | 1119.80 ± 687.50<br>n = 308 |                            | 18.15392                    | 359.2179      | < 0.0001 |          |
|                 |                            |                             |                            |                             | ANOVA         |          |          |
|                 | Native dry                 | Treated dry                 | Native wet                 | Treated wet                 | F             | df       | p-value  |
| Breaking force  | 167.58 ± 201.70<br>n = 447 | 97.98 ± 115.92<br>n = 433   | 452.43 ± 398.35<br>n = 221 | 581.63 ± 515.26<br>n = 200  | 170.4726      | 3        | < 0.0001 |
| Breaking stress | 258.35 ± 114.36<br>n = 232 | 504.51 ± 275.40<br>n = 224  | 852.96 ± 528.96<br>n = 155 | 1390.13 ± 724.56<br>n = 153 | 230.4705      | 3        | < 0.0001 |

**Supplementary Table 3.** For each zone (radular sac, mineralization zone, and working zone) sorted to condition (native or treated). Mean, standard deviation (Sd), and quantity (*n*) of analysed tooth areas (by EDX and nanoindentation) or quantity of broken teeth (by breaking force experiments) for the following parameters are given: (a) proportions, given in %, of Na, Mg, Si, P, S, Cl, K, Ca, Fe, and all elements. Differences between the zones for each condition were tested by Kruskal-Wallis test (orange p-values = highly significant). (b) Young's modulus (E) and hardness (H), given in GPa. Differences between the zones for each condition were tested by ANOVA (orange p-values = highly significant). (c) Breaking force (Bf), given in mN, and breaking stress (Bs), given in MPa. Differences between the zones for each condition (native dry, native wet, treated dry, or treated wet) were tested by Kruskal-Wallis test (black p-values = not significant).

| Parameter    | Condition   | Radular sac |        |        |     | Mineralization zone |         |        |     | Working zone |         |        |     | Results from Kruskal-Wallis |    |           |
|--------------|-------------|-------------|--------|--------|-----|---------------------|---------|--------|-----|--------------|---------|--------|-----|-----------------------------|----|-----------|
|              |             | Sum         | Mean   | Sd     | n   | Sum                 | Mean    | Sd     | n   | Sum          | Mean    | Sd     | n   | ChiSquare                   | df | p-value   |
| Na           | Native      | 16.09       | 0.03   | 0.19   | 637 | 5.31                | 0.01    | 0.12   | 797 | 43.62        | 0.07    | 0.38   | 640 | 27.6204                     | 2  | < 0.0001* |
| Mg           | Native      | 0.00        | 0.00   | 0.00   | 637 | 7.92                | 0.01    | 0.09   | 797 | 39.18        | 0.06    | 0.24   | 640 | 80.0754                     | 2  | < 0.0001* |
| Si           | Native      | 0.00        | 0.00   | 0.00   | 637 | 0.32                | 0.00    | 0.00   | 797 | 0.84         | 0.00    | 0.01   | 640 | 10.2193                     | 2  | 0.0060*   |
| P            | Native      | 1.34        | 0.00   | 0.04   | 637 | 67.00               | 0.08    | 0.43   | 797 | 101.85       | 0.16    | 0.67   | 640 | 41.7880                     | 2  | < 0.0001* |
| S            | Native      | 4.12        | 0.01   | 0.03   | 637 | 34.63               | 0.04    | 0.12   | 797 | 1.08         | 0.00    | 0.01   | 640 | 122.3041                    | 2  | < 0.0001* |
| Cl           | Native      | 0.00        | 0.00   | 0.00   | 637 | 8.18                | 0.01    | 0.05   | 797 | 0.06         | 0.00    | 0.00   | 640 | 76.9271                     | 2  | < 0.0001* |
| K            | Native      | 0.10        | 0.00   | 0.00   | 637 | 0.00                | 0.00    | 0.00   | 797 | 5.00         | 0.01    | 0.06   | 640 | 34.5237                     | 2  | < 0.0001* |
| Ca           | Native      | 312.58      | 0.49   | 0.96   | 637 | 1562.26             | 1.96    | 2.93   | 797 | 1294.83      | 2.02    | 2.26   | 640 | 182.6653                    | 2  | < 0.0001* |
| Fe           | Native      | 176.73      | 0.28   | 1.12   | 637 | 1492.93             | 1.87    | 4.94   | 797 | 2390.78      | 3.74    | 8.50   | 640 | 66.3440                     | 2  | < 0.0001* |
| All elements | Native      | 510.96      | 0.80   | 1.79   | 637 | 3178.55             | 3.99    | 7.59   | 797 | 3877.23      | 6.06    | 10.71  | 640 | 171.8470                    | 2  | < 0.0001* |
| Na           | Treated     | 0.00        | 0.00   | 0.00   | 638 | 0.00                | 0.00    | 0.00   | 796 | 0.90         | 0.00    | 0.03   | 634 | 4.5322                      | 2  | 0.1037    |
| Mg           | Treated     | 1.04        | 0.00   | 0.04   | 638 | 0.00                | 0.00    | 0.00   | 796 | 0.20         | 0.00    | 0.01   | 634 | 1.2553                      | 2  | 0.5338    |
| Si           | Treated     | 0.10        | 0.00   | 0.00   | 638 | 0.00                | 0.00    | 0.00   | 796 | 0.00         | 0.00    | 0.00   | 634 | 2.2445                      | 2  | 0.3255    |
| P            | Treated     | 0.00        | 0.00   | 0.00   | 638 | 1.61                | 0.00    | 0.04   | 796 | 0.00         | 0.00    | 0.00   | 634 | 3.1895                      | 2  | 0.2030    |
| S            | Treated     | 0.36        | 0.00   | 0.01   | 638 | 0.93                | 0.00    | 0.02   | 796 | 0.00         | 0.00    | 0.00   | 634 | 3.7718                      | 2  | 0.1517    |
| Cl           | Treated     | 0.11        | 0.00   | 0.00   | 638 | 1.61                | 0.00    | 0.02   | 796 | 0.06         | 0.00    | 0.00   | 634 | 14.7670                     | 2  | 0.0006*   |
| K            | Treated     | 0.10        | 0.00   | 0.00   | 638 | 0.00                | 0.00    | 0.00   | 796 | 1.25         | 0.00    | 0.02   | 634 | 14.6396                     | 2  | 0.0007*   |
| Ca           | Treated     | 12.83       | 0.02   | 0.11   | 638 | 38.60               | 0.05    | 0.21   | 796 | 57.94        | 0.09    | 0.33   | 634 | 28.0213                     | 2  | < 0.0001* |
| Fe           | Treated     | 191.86      | 0.30   | 1.21   | 638 | 1640.56             | 2.06    | 5.28   | 796 | 2649.28      | 4.18    | 9.18   | 634 | 66.5291                     | 2  | < 0.0001* |
| All elements | Treated     | 206.41      | 0.32   | 1.21   | 638 | 1683.30             | 2.11    | 5.28   | 796 | 2709.64      | 4.27    | 9.23   | 634 | 85.4997                     | 2  | < 0.0001* |
|              |             |             |        |        |     |                     |         |        |     |              |         |        |     | Results from ANOVA          |    |           |
|              |             |             |        |        |     |                     |         |        |     |              |         |        |     | F Ratio                     | df | p-value   |
| H            | Native      |             | 0.55   | 0.40   | 637 |                     | 1.53    | 0.84   | 797 |              | 2.10    | 0.81   | 640 | 749.4349                    | 2  | < 0.0001* |
| E            | Native      |             | 4.39   | 3.07   | 637 |                     | 12.03   | 6.36   | 797 |              | 16.77   | 6.17   | 640 | 827.3774                    | 2  | < 0.0001* |
| H            | Treated     |             | 0.44   | 0.28   | 638 |                     | 1.16    | 0.69   | 796 |              | 1.53    | 0.89   | 634 | 444.0553                    | 2  | < 0.0001* |
| E            | Treated     |             | 3.49   | 2.12   | 638 |                     | 8.05    | 4.92   | 796 |              | 11.82   | 6.81   | 634 | 443.8665                    | 2  | < 0.0001* |
|              |             |             |        |        |     |                     |         |        |     |              |         |        |     | Results from Kruskal-Wallis |    |           |
|              |             |             |        |        |     |                     |         |        |     |              |         |        |     | ChiSquare                   | df | p-value   |
| Bf           | Native dry  |             | 55.72  | 48.75  | 160 |                     | 170.25  | 165.09 | 151 |              | 296.21  | 264.24 | 136 | 195.3931                    | 2  | < 0.0001* |
| Bf           | Native wet  |             | 166.88 | 116.03 | 58  |                     | 433.48  | 294.42 | 77  |              | 662.12  | 472.92 | 86  | 51.3350                     | 2  | < 0.0001* |
| Bs           | Native dry  |             | 130.76 | 62.38  | 68  |                     | 272.30  | 78.68  | 86  |              | 354.21  | 71.53  | 78  | 142.8282                    | 2  | < 0.0001* |
| Bs           | Native wet  |             | 452.78 | 216.64 | 41  |                     | 863.75  | 411.53 | 56  |              | 1125.43 | 607.26 | 58  | 34.5874                     | 2  | < 0.0001* |
| Bf           | Treated dry |             | 35.12  | 29.71  | 159 |                     | 98.17   | 96.87  | 142 |              | 173.48  | 150.37 | 132 | 187.9531                    | 2  | < 0.0001* |
| Bf           | Treated wet |             | 210.08 | 156.47 | 54  |                     | 568.14  | 374.50 | 68  |              | 850.62  | 614.00 | 78  | 36.7029                     | 2  | < 0.0001* |
| Bs           | Treated dry |             | 273.77 | 142.42 | 67  |                     | 522.58  | 215.57 | 79  |              | 684.40  | 275.23 | 78  | 84.3258                     | 2  | < 0.0001* |
| Bs           | Treated wet |             | 591.94 | 264.89 | 41  |                     | 1382.89 | 361.75 | 54  |              | 1961.11 | 662.58 | 58  | 89.3619                     | 2  | < 0.0001* |

**Supplementary Table 4. For each tooth type (Ct, central tooth; Lt I, lateral tooth I; Lt II, lateral tooth II; Mt, marginal tooth) sorted to condition (native or treated). Sum, mean, standard deviation (Sd), and quantity (n) of analysed tooth areas (by EDX or nanoindentation) or quantity of broken teeth (by breaking stress experiments) for the following parameters: (a) proportions, in %, of Na, Mg, Si, P, S, Cl, K, Ca, Fe, and sum of all elements. Differences between the zones for each condition were tested by Kruskal-Wallis test (orange p-values = highly significant). (b) Young's modulus (E) and hardness (H) are given in GPa. Differences between the zones for each condition were tested by ANOVA (orange p-values = significant). (c) Breaking force (Bf) is given in mN and breaking stress (Bs) in MPa. Differences between the zones for each condition (native dry, native wet, treated dry, or treated wet) were tested by ANOVA (breaking force, orange p-values = highly significant) or by t test (breaking stress, orange p-values = highly significant).**

| Parameter    | Condition   | Ct     |        |        |     | Lt I   |        |        |     | Lt II   |         |        |     | Mt     |        |        |                                        | Results from Kruskal-Wallis |         |          |
|--------------|-------------|--------|--------|--------|-----|--------|--------|--------|-----|---------|---------|--------|-----|--------|--------|--------|----------------------------------------|-----------------------------|---------|----------|
|              |             | Sum    | Mean   | Sd     | n   | Sum    | Mean   | Sd     | n   | Sum     | Mean    | Sd     | n   | Sum    | Mean   | Sd     | n                                      | ChiSquare                   | df      | p-value  |
| Na           | Native      | 0.00   | 0.00   | 0.00   | 229 | 0.00   | 0.00   | 0.00   | 463 | 61.91   | 0.09    | 0.42   | 690 | 3.11   | 0.00   | 0.05   | 692                                    | 79.2646                     | 3       | <0.0001* |
| Mg           | Native      | 0.00   | 0.00   | 0.00   | 229 | 0.00   | 0.00   | 0.00   | 463 | 47.10   | 0.07    | 0.24   | 690 | 0.00   | 0.00   | 0.00   | 692                                    | 155.9332                    | 3       | <0.0001* |
| Si           | Native      | 0.00   | 0.00   | 0.00   | 229 | 0.17   | 0.00   | 0.01   | 463 | 0.55    | 0.00    | 0.01   | 690 | 0.44   | 0.00   | 0.01   | 692                                    | 3.9068                      | 3       | 0.2717   |
| P            | Native      | 0.00   | 0.00   | 0.00   | 229 | 0.00   | 0.00   | 0.00   | 463 | 163.14  | 0.24    | 0.76   | 690 | 2.04   | 0.01   | 0.19   | 692                                    | 193.2730                    | 3       | <0.0001* |
| S            | Native      | 5.58   | 0.02   | 0.10   | 229 | 7.22   | 0.02   | 0.06   | 463 | 11.89   | 0.02    | 0.06   | 690 | 15.14  | 0.02   | 0.09   | 692                                    | 5.4994                      | 3       | 0.1387   |
| Cl           | Native      | 0.52   | 0.00   | 0.02   | 229 | 2.26   | 0.00   | 0.03   | 463 | 4.07    | 0.01    | 0.05   | 690 | 1.39   | 0.00   | 0.02   | 692                                    | 4.4746                      | 3       | 0.2146   |
| K            | Native      | 1.22   | 0.01   | 0.06   | 229 | 0.00   | 0.00   | 0.00   | 463 | 3.37    | 0.00    | 0.04   | 690 | 0.51   | 0.00   | 0.01   | 692                                    | 15.5432                     | 3       | <0.0014* |
| Ca           | Native      | 113.75 | 0.50   | 1.01   | 229 | 189.76 | 0.41   | 0.97   | 463 | 2608.96 | 3.78    | 2.78   | 690 | 257.20 | 0.37   | 0.77   | 692                                    | 1047.4882                   | 3       | <0.0001* |
| Fe           | Native      | 7.05   | 0.03   | 0.17   | 229 | 3.21   | 0.01   | 0.06   | 463 | 4043.23 | 5.86    | 8.89   | 690 | 6.96   | 0.09   | 0.69   | 692                                    | 1296.9599                   | 3       | <0.0001* |
| All elements | Native      | 128.12 | 0.56   | 1.02   | 229 | 202.62 | 0.44   | 0.97   | 463 | 6944.22 | 10.06   | 11.21  | 690 | 291.77 | 0.42   | 0.79   | 692                                    | 1059.7455                   | 3       | <0.0001* |
| Na           | Treated     | 0.00   | 0.00   | 0.00   | 230 | 0.00   | 0.00   | 0.00   | 459 | 0.90    | 0.00    | 0.03   | 691 | 0.00   | 0.00   | 0.00   | 688                                    | 3.9932                      | 3       | 0.2622   |
| Mg           | Treated     | 1.24   | 0.01   | 0.07   | 230 | 0.00   | 0.00   | 0.00   | 459 | 0.00    | 0.00    | 0.00   | 691 | 0.00   | 0.00   | 0.00   | 688                                    | 16.0077                     | 3       | 0.0011*  |
| Si           | Treated     | 0.00   | 0.00   | 0.00   | 230 | 0.00   | 0.00   | 0.00   | 459 | 0.00    | 0.00    | 0.00   | 691 | 0.10   | 0.00   | 0.00   | 688                                    | 2.0000                      | 3       | 0.5724   |
| P            | Treated     | 0.00   | 0.00   | 0.00   | 230 | 0.83   | 0.00   | 0.04   | 459 | 0.78    | 0.00    | 0.03   | 691 | 0.00   | 0.00   | 0.00   | 688                                    | 1.7543                      | 3       | 0.6249   |
| S            | Treated     | 0.16   | 0.00   | 0.01   | 230 | 0.67   | 0.00   | 0.02   | 459 | 0.46    | 0.00    | 0.01   | 691 | 0.00   | 0.00   | 0.00   | 688                                    | 4.2058                      | 3       | 0.2401   |
| Cl           | Treated     | 0.06   | 0.00   | 0.00   | 230 | 1.06   | 0.00   | 0.02   | 459 | 0.48    | 0.00    | 0.01   | 691 | 0.18   | 0.00   | 0.00   | 688                                    | 4.4635                      | 3       | 0.2156   |
| K            | Treated     | 0.30   | 0.00   | 0.01   | 230 | 0.00   | 0.00   | 0.00   | 459 | 0.67    | 0.00    | 0.01   | 691 | 0.38   | 0.00   | 0.01   | 688                                    | 4.6665                      | 3       | 0.1979   |
| Ca           | Treated     | 8.51   | 0.04   | 0.16   | 230 | 3.13   | 0.01   | 0.05   | 459 | 77.31   | 0.11    | 0.37   | 691 | 20.43  | 0.03   | 0.11   | 688                                    | 40.0048                     | 3       | <0.0001* |
| Fe           | Treated     | 4.14   | 0.02   | 0.11   | 230 | 2.99   | 0.01   | 0.06   | 459 | 4467.46 | 6.47    | 9.49   | 691 | 7.12   | 0.01   | 0.10   | 688                                    | 1295.7281                   | 3       | <0.0001* |
| All elements | Treated     | 14.41  | 0.06   | 0.22   | 230 | 8.67   | 0.02   | 0.09   | 459 | 4548.06 | 6.58    | 9.50   | 691 | 28.21  | 0.04   | 0.14   | 688                                    | 1073.3262                   | 3       | <0.0001* |
|              |             |        |        |        |     |        |        |        |     |         |         |        |     |        |        |        | Results from ANOVA                     |                             |         |          |
|              |             |        |        |        |     |        |        |        |     |         |         |        |     |        |        |        | F ratio                                | df                          | p-value |          |
| H            | Native      |        | 0.93   | 0.62   | 229 |        | 0.96   | 0.63   | 463 |         | 2.08    | 1.08   | 690 |        | 1.18   | 0.64   | 692                                    | 251.9113                    | 3       | <0.0001* |
| E            | Native      |        | 7.79   | 5.25   | 229 |        | 7.87   | 5.26   | 463 |         | 16.17   | 8.32   | 690 |        | 9.44   | 5.18   | 692                                    | 218.3512                    | 3       | <0.0001* |
| H            | Treated     |        | 0.69   | 0.47   | 230 |        | 0.70   | 0.44   | 459 |         | 1.62    | 1.02   | 691 |        | 0.84   | 0.42   | 688                                    | 237.2871                    | 3       | <0.0001* |
| E            | Treated     |        | 5.91   | 4.05   | 230 |        | 6.00   | 3.76   | 459 |         | 11.30   | 8.14   | 691 |        | 6.11   | 2.70   | 688                                    | 144.0745                    | 3       | <0.0001* |
|              |             |        |        |        |     |        |        |        |     |         |         |        |     |        |        |        | Results from ANOVA (Bf) or t test (Bs) |                             |         |          |
|              |             |        |        |        |     |        |        |        |     |         |         |        |     |        |        |        | F ratio or t ratio                     | df                          | p-value |          |
| Bf           | Native dry  |        | 105.50 | 77.91  | 64  |        | 92.00  | 65.65  | 126 |         | 385.61  | 258.38 | 128 |        | 55.30  | 24.18  | 127                                    | 134.9219                    | 3       | <0.0001* |
| Bf           | Native wet  |        | 245.42 | 137.91 | 22  |        | 237.84 | 147.18 | 44  |         | 723.43  | 388.08 | 111 |        | 86.88  | 17.46  | 44                                     | 68.6591                     | 3       | <0.0001* |
| Bs           | Native dry  |        |        |        |     |        |        |        |     |         | 247.26  | 115.58 | 105 |        | 267.52 | 112.99 | 127                                    | 1.345512                    | 230     | <0.0001* |
| Bs           | Native wet  |        |        |        |     |        |        |        |     |         | 1059.60 | 487.74 | 111 |        | 331.66 | 72.27  | 44                                     | -9.83833                    | 153     | <0.0001* |
| Bf           | Treated dry |        | 72.22  | 53.80  | 62  |        | 64.75  | 50.77  | 124 |         | 208.47  | 158.03 | 124 |        | 33.06  | 15.46  | 123                                    | 87.9258                     | 3       | <0.0001* |
| Bf           | Treated wet |        | 326.40 | 193.25 | 15  |        | 276.83 | 191.40 | 32  |         | 897.57  | 478.05 | 111 |        | 70.03  | 18.94  | 42                                     | 63.4137                     | 3       | <0.0001* |
| Bs           | Treated dry |        |        |        |     |        |        |        |     |         | 423.79  | 274.30 | 101 |        | 570.78 | 259.12 | 123                                    | 4.114165                    | 222     | <0.0001* |
| Bs           | Treated wet |        |        |        |     |        |        |        |     |         | 1551.42 | 766.01 | 111 |        | 963.86 | 339.81 | 42                                     | -4.78827                    | 151     | <0.0001* |

**Supplementary Table 5.** For proportions of Na, Mg, Si, P, S, Cl, K, Ca, Fe, all elements, Young's modulus (E), hardness (H), breaking force (Bf), and breaking stress (Bs): pairwise comparison between treated and native tooth types (Ct, central tooth; Lt I, lateral tooth I; Lt II, lateral tooth II; Mt, marginal tooth) was performed by Wilcoxon method (orange p-values = highly significant, red = significant).

| Parameter          | Structure 1       | Structure 1       | 1-Way Test, ChiSquare approximation |    |         | Wilcoxon method |   |         |         |
|--------------------|-------------------|-------------------|-------------------------------------|----|---------|-----------------|---|---------|---------|
|                    |                   |                   | ChiSquare                           | df | p-value | p-value         |   |         |         |
| Na                 | Treated Lt II     | Native Lt II      | 197.7465                            | 7  | <.0001* | <.0001*         |   |         |         |
| Na                 | Treated Lt I      | Native Lt I       |                                     |    |         | 1.0000          |   |         |         |
| Na                 | Treated Mt        | Native Mt         |                                     |    |         | 0.0254          |   |         |         |
| Na                 | Treated Ct        | Native Ct         |                                     |    |         | 1.0000          |   |         |         |
| Mg                 | Treated Lt II     | Native Lt II      | 369.3892                            | 7  | <.0001* | <.0001*         |   |         |         |
| Mg                 | Treated Lt I      | Native Lt I       |                                     |    |         | 1.0000          |   |         |         |
| Mg                 | Treated Mt        | Native Mt         |                                     |    |         | 1.0000          |   |         |         |
| Mg                 | Treated Ct        | Native Ct         |                                     |    |         | 0.1587          |   |         |         |
| Si                 | Treated Lt II     | Native Lt II      | 20.8149                             | 7  | 0.0041* | 0.0046*         |   |         |         |
| Si                 | Treated Lt I      | Native Lt I       |                                     |    |         | 0.1593          |   |         |         |
| Si                 | Treated Mt        | Native Mt         |                                     |    |         | 0.0591          |   |         |         |
| Si                 | Treated Ct        | Native Ct         |                                     |    |         | 1.0000          |   |         |         |
| P                  | Treated Lt II     | Native Lt II      | 464.6647                            | 7  | <.0001* | <.0001*         |   |         |         |
| P                  | Treated Lt        | Native Lt I       |                                     |    |         | 0.3163          |   |         |         |
| P                  | Treated Mt        | Native Mt         |                                     |    |         | 0.1581          |   |         |         |
| P                  | Treated Ct        | Native Ct         |                                     |    |         | 1.0000          |   |         |         |
| S                  | Treated Lt II     | Native Lt II      | 179.2865                            | 7  | <.0001* | <.0001*         |   |         |         |
| S                  | Treated Lt I      | Native Lt I       |                                     |    |         | <.0001*         |   |         |         |
| S                  | Treated Mt        | Native Mt         |                                     |    |         | <.0001*         |   |         |         |
| S                  | Treated Ct        | Native Ct         |                                     |    |         | <.0001*         |   |         |         |
| Cl                 | Treated Lt II     | Native Lt II      | 28.0896                             | 7  | 0.0002* | 0.0034*         |   |         |         |
| Cl                 | Treated Lt I      | Native Lt I       |                                     |    |         | 0.0732          |   |         |         |
| Cl                 | Treated Mt        | Native Mt         |                                     |    |         | 0.0072*         |   |         |         |
| Cl                 | Treated Ct        | Native Ct         |                                     |    |         | 0.3126          |   |         |         |
| K                  | Treated Lt II     | Native Lt II      | 26.8353                             | 7  | 0.0004* | 0.0559          |   |         |         |
| K                  | Treated Lt I      | Native Lt I       |                                     |    |         | 1.0000          |   |         |         |
| K                  | Treated Mt        | Native Mt         |                                     |    |         | 0.9988          |   |         |         |
| K                  | Treated Ct        | Native Ct         |                                     |    |         | 0.6484          |   |         |         |
| Ca                 | Treated Lt II     | Native Lt II      | 2177.0622                           | 7  | <.0001* | <.0001*         |   |         |         |
| Ca                 | Treated Lt I      | Native Lt I       |                                     |    |         | <.0001*         |   |         |         |
| Ca                 | Treated Mt        | Native Mt         |                                     |    |         | <.0001*         |   |         |         |
| Ca                 | Treated Ct        | Native Ct         |                                     |    |         | <.0001*         |   |         |         |
| Fe                 | Treated Lt II     | Native Lt II      | 2593.3205                           | 7  | <.0001* | 0.4500          |   |         |         |
| Fe                 | Treated Lt I      | Native Lt I       |                                     |    |         | 0.9891          |   |         |         |
| Fe                 | Treated Mt        | Native Mt         |                                     |    |         | 0.9943          |   |         |         |
| Fe                 | Treated Ct        | Native Ct         |                                     |    |         | 0.6103          |   |         |         |
| All elements       | Treated Lt II     | Native Lt II      | 2146.2191                           | 7  | <.0001* | <.0001*         |   |         |         |
| All elements       | Treated Lt I      | Native Lt I       |                                     |    |         | <.0001*         |   |         |         |
| All elements       | Treated Mt        | Native Mt         |                                     |    |         | <.0001*         |   |         |         |
| All elements       | Treated Ct        | Native Ct         |                                     |    |         | <.0001*         |   |         |         |
| Results from ANOVA |                   |                   |                                     |    |         | Tukey-Kramer    |   |         |         |
|                    |                   |                   | F ratio                             | df | p-value | p-value         |   |         |         |
| H                  | Treated Lt II     | Native Lt II      | 242.8407                            | 7  | <.0001* | <.0001*         |   |         |         |
| H                  | Treated Lt I      | Native Lt I       |                                     |    |         | <.0001*         |   |         |         |
| H                  | Treated Mt        | Native Mt         |                                     |    |         | <.0001*         |   |         |         |
| H                  | Treated Ct        | Native Ct         |                                     |    |         | 0.0117*         |   |         |         |
| E                  | Treated Lt II     | Native Lt II      | 207.5219                            | 7  | <.0001* | <.0001*         |   |         |         |
| E                  | Treated Lt I      | Native Lt I       |                                     |    |         | <.0001*         |   |         |         |
| E                  | Treated Mt        | Native Mt         |                                     |    |         | <.0001*         |   |         |         |
| E                  | Treated Ct        | Native Ct         |                                     |    |         | 0.0170*         |   |         |         |
| Bf                 | Native dry Lt II  | Native wet Lt II  | 145.1643                            | 15 | <.0001* | <.0001*         |   |         |         |
| Bf                 | Native dry Lt I   | Native wet Lt I   |                                     |    |         | 0.0086*         |   |         |         |
| Bf                 | Native dry Mt     | Native wet Mt     |                                     |    |         | 1.0000          |   |         |         |
| Bf                 | Native dry Ct     | Native wet Ct     |                                     |    |         | 0.3516          |   |         |         |
| Bf                 | Treated dry Lt II | Treated wet Lt II |                                     |    |         | <.0001*         |   |         |         |
| Bf                 | Treated dry Lt I  | Treated wet Lt I  |                                     |    |         | <.0001*         |   |         |         |
| Bf                 | Treated dry Mt    | Treated wet Mt    |                                     |    |         | 0.9999          |   |         |         |
| Bf                 | Treated dry Ct    | Treated wet Ct    |                                     |    |         | 0.0034*         |   |         |         |
| Bf                 | Native dry Lt II  | Treated dry Lt II |                                     |    |         | <.0001*         |   |         |         |
| Bf                 | Native dry Lt I   | Treated dry Lt I  |                                     |    |         | 0.9998          |   |         |         |
| Bf                 | Native dry Mt     | Treated dry Mt    |                                     |    |         | 1.0000          |   |         |         |
| Bf                 | Native dry Ct     | Treated dry Ct    |                                     |    |         | 1.0000          |   |         |         |
| Bf                 | Native wet Lt II  | Treated wet Lt II |                                     |    |         | <.0001*         |   |         |         |
| Bf                 | Native wet Lt I   | Treated wet Lt I  |                                     |    |         | 1.0000          |   |         |         |
| Bf                 | Native wet Mt     | Treated wet Mt    |                                     |    |         | 1.0000          |   |         |         |
| Bf                 | Native wet Ct     | Treated wet Ct    |                                     |    |         | 0.9991          |   |         |         |
| Bs                 | Native dry Lt II  | Native wet Lt II  |                                     |    |         | 149.5308        | 7 | <.0001* | <.0001* |
| Bs                 | Native dry Mt     | Native wet Mt     |                                     |    |         |                 |   |         | 0.9817  |
| Bs                 | Treated dry Lt II | Treated wet Lt II |                                     |    |         |                 |   |         | <.0001* |
| Bs                 | Treated dry Mt    | Treated wet Mt    |                                     |    |         |                 |   |         | <.0001* |
| Bs                 | Native dry Lt II  | Treated dry Lt II | <.0001*                             |    |         |                 |   |         |         |
| Bs                 | Native dry Mt     | Treated dry Mt    | <.0001*                             |    |         |                 |   |         |         |
| Bs                 | Native wet Lt II  | Treated wet Lt II | <.0001*                             |    |         |                 |   |         |         |
| Bs                 | Native wet Mt     | Treated wet Mt    | <.0001*                             |    |         |                 |   |         |         |

**Supplementary Table 6.** For each tooth type sorted to condition (native or treated) and radular zone (Mz, mineralization zone; Rs, radular sac; Wz, working zone). Mean (M), standard deviation (Sd), and quantity of analysed tooth areas (*n*) are provided for the following parameters (P): proportions, given in %, of Na, Mg, Si, P, S, Cl, K, Ca, Fe, and all elements (Ae) Young's modulus (E) and hardness (H), given in GPa. U, unit of measure.



| Condition | Zone | Parameter | U   | Central tooth |      |    | Lateral tooth I |      |     | Lateral tooth II |       |     | Marginal tooth |      |     |
|-----------|------|-----------|-----|---------------|------|----|-----------------|------|-----|------------------|-------|-----|----------------|------|-----|
|           |      |           |     | M             | Sd   | n  | M               | Sd   | n   | M                | Sd    | n   | M              | Sd   | n   |
| Native    | Rs   | H         | GPa | 0.31          | 0.02 | 69 | 0.34            | 0.03 | 143 | 0.85             | 0.54  | 213 | 0.49           | 0.21 | 211 |
| Native    | Rs   | E         | GPa | 2.62          | 0.17 | 69 | 2.76            | 0.28 | 143 | 6.62             | 4.16  | 213 | 3.83           | 1.65 | 211 |
| Native    | Rs   | Fe        | %   | 0.01          | 0.09 | 69 | 0.02            | 0.11 | 143 | 0.78             | 1.82  | 213 | 0.03           | 0.16 | 211 |
| Native    | Rs   | Ca        | %   | 0.10          | 0.28 | 69 | 0.03            | 0.20 | 143 | 1.23             | 1.27  | 213 | 0.18           | 0.48 | 211 |
| Native    | Rs   | Na        | %   | 0.00          | 0.00 | 69 | 0.00            | 0.00 | 143 | 0.06             | 0.32  | 213 | 0.01           | 0.10 | 211 |
| Native    | Rs   | Mg        | %   | 0.00          | 0.00 | 69 | 0.00            | 0.00 | 143 | 0.00             | 0.00  | 213 | 0.00           | 0.00 | 211 |
| Native    | Rs   | Si        | %   | 0.00          | 0.00 | 69 | 0.00            | 0.00 | 143 | 0.00             | 0.00  | 213 | 0.00           | 0.00 | 211 |
| Native    | Rs   | P         | %   | 0.00          | 0.00 | 69 | 0.00            | 0.00 | 143 | 0.01             | 0.07  | 213 | 0.00           | 0.00 | 211 |
| Native    | Rs   | S         | %   | 0.00          | 0.00 | 69 | 0.01            | 0.04 | 143 | 0.01             | 0.03  | 213 | 0.01           | 0.04 | 211 |
| Native    | Rs   | Cl        | %   | 0.00          | 0.00 | 69 | 0.00            | 0.00 | 143 | 0.00             | 0.00  | 213 | 0.00           | 0.00 | 211 |
| Native    | Rs   | K         | %   | 0.00          | 0.01 | 69 | 0.00            | 0.00 | 143 | 0.00             | 0.00  | 213 | 0.00           | 0.00 | 211 |
| Native    | Rs   | Ae        | %   | 0.11          | 0.28 | 69 | 0.06            | 0.23 | 143 | 2.09             | 2.60  | 213 | 0.23           | 0.50 | 211 |
| Native    | Mz   | H         | GPa | 0.80          | 0.38 | 90 | 0.82            | 0.39 | 178 | 2.41             | 0.64  | 263 | 1.37           | 0.49 | 265 |
| Native    | Mz   | E         | GPa | 6.64          | 3.13 | 90 | 6.75            | 3.23 | 178 | 18.64            | 4.83  | 263 | 10.86          | 3.84 | 265 |
| Native    | Mz   | Fe        | %   | 0.03          | 0.16 | 90 | 0.00            | 0.01 | 178 | 5.66             | 7.25  | 263 | 0.00           | 0.02 | 265 |
| Native    | Mz   | Ca        | %   | 0.52          | 1.05 | 90 | 0.39            | 0.88 | 178 | 5.20             | 3.03  | 263 | 0.30           | 0.57 | 265 |
| Native    | Mz   | Na        | %   | 0.00          | 0.00 | 90 | 0.00            | 0.00 | 178 | 0.02             | 0.20  | 263 | 0.00           | 0.00 | 265 |
| Native    | Mz   | Mg        | %   | 0.00          | 0.00 | 90 | 0.00            | 0.00 | 178 | 0.03             | 0.15  | 263 | 0.00           | 0.00 | 265 |
| Native    | Mz   | Si        | %   | 0.00          | 0.00 | 90 | 0.00            | 0.00 | 178 | 0.00             | 0.00  | 263 | 0.00           | 0.01 | 265 |
| Native    | Mz   | P         | %   | 0.00          | 0.00 | 90 | 0.00            | 0.00 | 178 | 0.24             | 0.70  | 263 | 0.01           | 0.17 | 265 |
| Native    | Mz   | S         | %   | 0.06          | 0.15 | 90 | 0.03            | 0.09 | 178 | 0.04             | 0.09  | 263 | 0.05           | 0.14 | 265 |
| Native    | Mz   | Cl        | %   | 0.01          | 0.03 | 90 | 0.01            | 0.05 | 178 | 0.02             | 0.08  | 263 | 0.01           | 0.02 | 265 |
| Native    | Mz   | K         | %   | 0.00          | 0.00 | 90 | 0.00            | 0.00 | 178 | 0.00             | 0.00  | 263 | 0.00           | 0.00 | 265 |
| Native    | Mz   | Ae        | %   | 0.62          | 1.03 | 90 | 0.44            | 0.87 | 178 | 11.21            | 9.79  | 263 | 0.37           | 0.60 | 265 |
| Native    | Wz   | H         | GPa | 1.71          | 0.28 | 70 | 1.75            | 0.29 | 142 | 2.92             | 0.79  | 214 | 1.64           | 0.51 | 210 |
| Native    | Wz   | E         | GPa | 14.37         | 2.46 | 70 | 14.41           | 2.52 | 142 | 22.65            | 6.11  | 214 | 13.24          | 4.21 | 210 |
| Native    | Wz   | Fe        | %   | 0.05          | 0.24 | 70 | 0.03            | 0.03 | 142 | 11.15            | 11.57 | 214 | 0.00           | 0.04 | 210 |
| Native    | Wz   | Ca        | %   | 0.87          | 1.26 | 70 | 0.82            | 1.34 | 142 | 4.58             | 1.61  | 214 | 0.65           | 1.09 | 210 |
| Native    | Wz   | Na        | %   | 0.00          | 0.00 | 70 | 0.00            | 0.00 | 142 | 0.20             | 0.64  | 214 | 0.00           | 0.00 | 210 |
| Native    | Wz   | Mg        | %   | 0.00          | 0.00 | 70 | 0.00            | 0.00 | 142 | 0.18             | 0.38  | 214 | 0.00           | 0.00 | 210 |
| Native    | Wz   | Si        | %   | 0.00          | 0.00 | 70 | 0.00            | 0.01 | 142 | 0.00             | 0.01  | 214 | 0.00           | 0.01 | 210 |
| Native    | Wz   | P         | %   | 0.00          | 0.00 | 70 | 0.00            | 0.00 | 142 | 0.46             | 1.07  | 214 | 0.02           | 0.29 | 210 |
| Native    | Wz   | S         | %   | 0.00          | 0.00 | 70 | 0.00            | 0.00 | 142 | 0.01             | 0.02  | 214 | 0.00           | 0.00 | 210 |
| Native    | Wz   | Cl        | %   | 0.00          | 0.01 | 70 | 0.00            | 0.00 | 142 | 0.00             | 0.00  | 214 | 0.00           | 0.00 | 210 |
| Native    | Wz   | K         | %   | 0.02          | 0.11 | 70 | 0.00            | 0.00 | 142 | 0.02             | 0.07  | 214 | 0.00           | 0.02 | 210 |
| Native    | Wz   | Ae        | %   | 0.93          | 1.29 | 70 | 0.86            | 1.35 | 142 | 16.60            | 13.18 | 214 | 0.67           | 1.12 | 210 |
| Treated   | Rs   | H         | GPa | 0.23          | 0.02 | 71 | 0.29            | 0.04 | 140 | 0.62             | 0.37  | 212 | 0.42           | 0.16 | 209 |
| Treated   | Rs   | E         | GPa | 1.95          | 0.15 | 71 | 2.38            | 0.27 | 140 | 4.86             | 2.94  | 212 | 3.35           | 1.10 | 209 |
| Treated   | Rs   | Fe        | %   | 0.01          | 0.07 | 71 | 0.02            | 0.10 | 140 | 0.85             | 1.97  | 212 | 0.03           | 0.16 | 209 |
| Treated   | Rs   | Ca        | %   | 0.02          | 0.07 | 71 | 0.00            | 0.00 | 140 | 0.05             | 0.18  | 212 | 0.00           | 0.04 | 209 |
| Treated   | Rs   | Na        | %   | 0.00          | 0.00 | 71 | 0.00            | 0.00 | 140 | 0.00             | 0.00  | 212 | 0.00           | 0.00 | 209 |
| Treated   | Rs   | Mg        | %   | 0.01          | 0.12 | 71 | 0.00            | 0.00 | 140 | 0.00             | 0.00  | 212 | 0.00           | 0.00 | 209 |
| Treated   | Rs   | Si        | %   | 0.00          | 0.00 | 71 | 0.00            | 0.00 | 140 | 0.00             | 0.00  | 212 | 0.00           | 0.01 | 209 |
| Treated   | Rs   | P         | %   | 0.00          | 0.00 | 71 | 0.00            | 0.00 | 140 | 0.00             | 0.00  | 212 | 0.00           | 0.00 | 209 |
| Treated   | Rs   | S         | %   | 0.00          | 0.00 | 71 | 0.00            | 0.00 | 140 | 0.00             | 0.02  | 212 | 0.00           | 0.00 | 209 |
| Treated   | Rs   | Cl        | %   | 0.00          | 0.00 | 71 | 0.00            | 0.01 | 140 | 0.00             | 0.00  | 212 | 0.00           | 0.00 | 209 |
| Treated   | Rs   | K         | %   | 0.00          | 0.01 | 71 | 0.00            | 0.00 | 140 | 0.00             | 0.00  | 212 | 0.00           | 0.00 | 209 |
| Treated   | Rs   | Ae        | %   | 0.04          | 0.15 | 71 | 0.02            | 0.10 | 140 | 0.90             | 1.96  | 212 | 0.03           | 0.17 | 209 |
| Treated   | Mz   | H         | GPa | 0.61          | 0.31 | 89 | 0.62            | 0.29 | 176 | 1.87             | 0.61  | 264 | 1.01           | 0.38 | 267 |

|         |    |    |     |       |      |    |       |      |     |       |       |     |      |      |     |
|---------|----|----|-----|-------|------|----|-------|------|-----|-------|-------|-----|------|------|-----|
| Treated | Mz | E  | GPa | 5.29  | 2.70 | 89 | 5.21  | 2.38 | 176 | 12.03 | 6.05  | 264 | 6.94 | 2.27 | 267 |
| Treated | Mz | Fe | %   | 0.01  | 0.12 | 89 | 0.00  | 0.01 | 176 | 6.21  | 7.66  | 264 | 0.00 | 0.02 | 267 |
| Treated | Mz | Ca | %   | 0.03  | 0.20 | 89 | 0.02  | 0.08 | 176 | 0.09  | 0.32  | 264 | 0.04 | 0.11 | 267 |
| Treated | Mz | Na | %   | 0.00  | 0.00 | 89 | 0.00  | 0.00 | 176 | 0.00  | 0.00  | 264 | 0.00 | 0.00 | 267 |
| Treated | Mz | Mg | %   | 0.00  | 0.00 | 89 | 0.00  | 0.00 | 176 | 0.00  | 0.00  | 264 | 0.00 | 0.00 | 267 |
| Treated | Mz | Si | %   | 0.00  | 0.00 | 89 | 0.00  | 0.00 | 176 | 0.00  | 0.00  | 264 | 0.00 | 0.00 | 267 |
| Treated | Mz | P  | %   | 0.00  | 0.00 | 89 | 0.00  | 0.06 | 176 | 0.00  | 0.05  | 264 | 0.00 | 0.00 | 267 |
| Treated | Mz | S  | %   | 0.00  | 0.02 | 89 | 0.00  | 0.03 | 176 | 0.00  | 0.01  | 264 | 0.00 | 0.00 | 267 |
| Treated | Mz | Cl | %   | 0.00  | 0.00 | 89 | 0.01  | 0.04 | 176 | 0.00  | 0.01  | 264 | 0.00 | 0.01 | 267 |
| Treated | Mz | K  | %   | 0.00  | 0.00 | 89 | 0.00  | 0.00 | 176 | 0.00  | 0.00  | 264 | 0.00 | 0.00 | 267 |
| Treated | Mz | Ae | %   | 0.05  | 0.23 | 89 | 0.03  | 0.12 | 176 | 6.30  | 7.63  | 264 | 0.04 | 0.04 | 267 |
| Treated | Wz | H  | GPa | 1.24  | 0.26 | 65 | 1.22  | 0.28 | 145 | 2.31  | 1.12  | 223 | 1.05 | 0.33 | 214 |
| Treated | Wz | E  | GPa | 10.73 | 2.18 | 65 | 10.59 | 1.97 | 145 | 16.88 | 9.36  | 223 | 7.84 | 2.14 | 214 |
| Treated | Wz | Fe | %   | 0.00  | 0.00 | 65 | 0.03  | 0.14 | 145 | 12.42 | 12.19 | 223 | 0.00 | 0.04 | 214 |
| Treated | Wz | Ca | %   | 0.07  | 0.17 | 65 | 0.00  | 0.00 | 145 | 0.20  | 0.52  | 223 | 0.05 | 0.15 | 214 |
| Treated | Wz | Na | %   | 0.00  | 0.00 | 65 | 0.00  | 0.00 | 145 | 0.00  | 0.06  | 223 | 0.00 | 0.00 | 214 |
| Treated | Wz | Mg | %   | 0.00  | 0.02 | 65 | 0.00  | 0.00 | 145 | 0.00  | 0.00  | 223 | 0.00 | 0.00 | 214 |
| Treated | Wz | Si | %   | 0.00  | 0.00 | 65 | 0.00  | 0.00 | 145 | 0.00  | 0.00  | 223 | 0.00 | 0.00 | 214 |
| Treated | Wz | P  | %   | 0.00  | 0.00 | 65 | 0.00  | 0.00 | 145 | 0.00  | 0.00  | 223 | 0.00 | 0.00 | 214 |
| Treated | Wz | S  | %   | 0.00  | 0.00 | 65 | 0.00  | 0.00 | 145 | 0.00  | 0.00  | 223 | 0.00 | 0.00 | 214 |
| Treated | Wz | Cl | %   | 0.00  | 0.01 | 65 | 0.00  | 0.00 | 145 | 0.00  | 0.00  | 223 | 0.00 | 0.00 | 214 |
| Treated | Wz | K  | %   | 0.00  | 0.02 | 65 | 0.00  | 0.00 | 145 | 0.00  | 0.02  | 223 | 0.00 | 0.02 | 214 |
| Treated | Wz | Ae | %   | 0.08  | 0.18 | 65 | 0.09  | 0.25 | 145 | 12.63 | 12.18 | 223 | 0.05 | 0.16 | 214 |

**Supplementary Table 7. For each tooth type sorted to condition (native dry, native wet, treated dry, treated wet) and radular zone (Mz, mineralization zone; Rs, radular sac; Wz, working zone). Mean (M), standard deviation (Sd), and quantity (n) of broken teeth for breaking force (Bf) and calculated breaking stress (Bs) are provided. D, dry; W, wet.**

| Condition | Zone | D<br>or<br>W | Central tooth |        |    | Lateral tooth I |        |    | Lateral tooth II |        |    |         |        |    | Marginal tooth |       |    |         |        |    |
|-----------|------|--------------|---------------|--------|----|-----------------|--------|----|------------------|--------|----|---------|--------|----|----------------|-------|----|---------|--------|----|
|           |      |              | Bf, mN        |        |    | Bf, mN          |        |    | Bf, mN           |        |    | Bs, MPa |        |    | Bf, mN         |       |    | Bs, MPa |        |    |
|           |      |              | M             | Sd     | n  | M               | Sd     | n  | M                | Sd     | n  | M       | Sd     | n  | M              | Sd    | n  | M       | Sd     | n  |
| Native    | Rs   | D            | 40.10         | 17.14  | 24 | 37.23           | 12.30  | 45 | 104.27           | 66.21  | 47 | 81.84   | 46.84  | 24 | 31.30          | 10.28 | 44 | 157.44  | 53.16  | 44 |
| Native    | Mz   | D            | 91.28         | 38.85  | 21 | 84.23           | 28.52  | 43 | 414.82           | 111.87 | 42 | 244.91  | 66.65  | 42 | 60.51          | 16.17 | 43 | 298.45  | 81.05  | 43 |
| Native    | Wz   | D            | 203.82        | 55.23  | 19 | 163.97          | 66.11  | 39 | 693.19           | 91.48  | 39 | 351.59  | 44.47  | 39 | 76.49          | 19.08 | 40 | 356.82  | 91.51  | 40 |
| Native    | Rs   | W            | 81.14         | 12.67  | 6  | 90.60           | 13.97  | 10 | 245.56           | 113.77 | 30 | 503.37  | 232.16 | 30 | 74.30          | 11.03 | 11 | 314.81  | 53.11  | 11 |
| Native    | Mz   | W            | 213.21        | 58.54  | 7  | 186.94          | 58.57  | 14 | 668.25           | 179.62 | 42 | 1046.01 | 299.33 | 42 | 85.87          | 14.63 | 14 | 316.96  | 68.12  | 14 |
| Native    | Wz   | W            | 379.98        | 75.75  | 9  | 360.60          | 134.13 | 19 | 1150.45          | 143.07 | 39 | 1502.10 | 324.68 | 39 | 94.91          | 18.44 | 19 | 352.25  | 82.29  | 19 |
| Treated   | Rs   | D            | 27.27         | 11.65  | 24 | 25.32           | 8.36   | 45 | 63.75            | 40.36  | 47 | 158.80  | 86.45  | 24 | 18.47          | 6.97  | 43 | 337.94  | 126.54 | 43 |
| Treated   | Mz   | D            | 62.81         | 27.00  | 19 | 57.28           | 19.39  | 44 | 232.46           | 95.62  | 38 | 447.08  | 227.67 | 38 | 33.99          | 9.92  | 41 | 592.55  | 179.56 | 41 |
| Treated   | Wz   | D            | 138.42        | 38.63  | 19 | 124.83          | 53.98  | 35 | 359.50           | 141.69 | 37 | 564.18  | 279.08 | 37 | 48.19          | 11.54 | 38 | 804.63  | 214.36 | 38 |
| Treated   | Rs   | W            | 100.81        | 17.39  | 4  | 99.29           | 27.93  | 9  | 312.99           | 139.11 | 30 | 613.95  | 272.97 | 30 | 59.81          | 22.46 | 11 | 531.91  | 243.25 | 11 |
| Treated   | Mz   | W            | 318.89        | 18.33  | 3  | 213.91          | 82.18  | 11 | 820.56           | 227.67 | 41 | 1440.57 | 379.79 | 41 | 71.70          | 16.34 | 12 | 1181.00 | 189.00 | 12 |
| Treated   | Wz   | W            | 442.02        | 173.44 | 8  | 467.66          | 164.50 | 12 | 1430.19          | 152.83 | 39 | 2391.93 | 231.55 | 39 | 74.90          | 14.38 | 19 | 1076.80 | 222.24 | 19 |

**Supplementary Table 8.** For the following parameters: proportions of Na, Mg, Si, P, S, Cl, K, Ca, Fe, all elements, Young's modulus (E), hardness (H), breaking force (Bf), and breaking stress (Bs). Pairwise comparison between treated and native tooth types (Ct, central tooth; Lt I, lateral tooth I; Lt II, lateral tooth II; Mt, marginal tooth) was performed by Wilcoxon method (orange p-values = highly significant, red = significant).

| Parameter | Zone | Structure 1   | Structure 1  | 1-Way Test, ChiSquare approximation |    |         | Wilcoxon method |
|-----------|------|---------------|--------------|-------------------------------------|----|---------|-----------------|
|           |      |               |              | ChiSquare                           | df | p-value | p-value         |
| Na        | Rs   | Treated Lt II | Native Lt II | 419.6903                            | 7  | <.0001* | 0.0004*         |
| Na        | Rs   | Treated Lt I  | Native Lt I  |                                     |    |         | 1.0000          |
| Na        | Rs   | Treated Mt    | Native Mt    |                                     |    |         | 0.0245*         |
| Na        | Rs   | Treated Ct    | Native Ct    |                                     |    |         | 1.0000          |
| Na        | Mz   | Treated Lt II | Native Lt II | 20.2967                             | 7  | 0.0050* | 0.0447*         |
| Na        | Mz   | Treated Lt I  | Native Lt I  |                                     |    |         | 1.0000          |
| Na        | Mz   | Treated Mt    | Native Mt    |                                     |    |         | 1.0000          |
| Na        | Mz   | Treated Ct    | Native Ct    |                                     |    |         | 1.0000          |
| Na        | Wz   | Treated Lt II | Native Lt II | 145.0505                            | 7  | <.0001* | <.0001*         |
| Na        | Wz   | Treated Lt I  | Native Lt I  |                                     |    |         | 1.0000          |
| Na        | Wz   | Treated Mt    | Native Mt    |                                     |    |         | 1.0000          |
| Na        | Wz   | Treated Ct    | Native Ct    |                                     |    |         | 1.0000          |
| Mg        | Rs   | Treated Lt II | Native Lt II | 16.9577                             | 7  | 0.0177* | 1.0000          |
| Mg        | Rs   | Treated Lt I  | Native Lt I  |                                     |    |         | 1.0000          |
| Mg        | Rs   | Treated Mt    | Native Mt    |                                     |    |         | 1.0000          |
| Mg        | Rs   | Treated Ct    | Native Ct    |                                     |    |         | 0.3313          |
| Mg        | Mz   | Treated Lt II | Native Lt II | 92.1423                             | 7  | <.0001* | <.0001*         |
| Mg        | Mz   | Treated Lt I  | Native Lt I  |                                     |    |         | 1.0000          |
| Mg        | Mz   | Treated Mt    | Native Mt    |                                     |    |         | 1.0000          |
| Mg        | Mz   | Treated Ct    | Native Ct    |                                     |    |         | 1.0000          |
| Mg        | Wz   | Treated Lt II | Native Lt II | 288.8741                            | 7  | <.0001* | <.0001*         |
| Mg        | Wz   | Treated Lt I  | Native Lt I  |                                     |    |         | 1.0000          |
| Mg        | Wz   | Treated Mt    | Native Mt    |                                     |    |         | 1.0000          |
| Mg        | Wz   | Treated Ct    | Native Ct    |                                     |    |         | 0.3243          |
| Si        | Rs   | Treated Lt II | Native Lt II | 4.9859                              | 7  | 0.6617  | 1.0000          |
| Si        | Rs   | Treated Lt I  | Native Lt I  |                                     |    |         | 1.0000          |
| Si        | Rs   | Treated Mt    | Native Mt    |                                     |    |         | 0.3207          |
| Si        | Rs   | Treated Ct    | Native Ct    |                                     |    |         | 1.0000          |
| Si        | Mz   | Treated Lt II | Native Lt II | 14.0921                             | 7  | 0.0496* | 0.1569          |
| Si        | Mz   | Treated Lt I  | Native Lt I  |                                     |    |         | 1.0000          |
| Si        | Mz   | Treated Mt    | Native Mt    |                                     |    |         | 0.0447*         |
| Si        | Mz   | Treated Ct    | Native Ct    |                                     |    |         | 1.0000          |
| Si        | Wz   | Treated Lt II | Native Lt II | 17.5084                             | 7  | 0.0144* | 0.0140*         |
| Si        | Wz   | Treated Lt I  | Native Lt I  |                                     |    |         | 0.1595          |
| Si        | Wz   | Treated Mt    | Native Mt    |                                     |    |         | 0.1617          |
| Si        | Wz   | Treated Ct    | Native Ct    |                                     |    |         | 1.0000          |
| P         | Rs   | Treated Lt II | Native Lt II | 9.9797                              | 7  | 0.1897  | 0.1568          |
| P         | Rs   | Treated Lt    | Native Lt I  |                                     |    |         | 1.0000          |
| P         | Rs   | Treated Mt    | Native Mt    |                                     |    |         | 1.0000          |
| P         | Rs   | Treated Ct    | Native Ct    |                                     |    |         | 1.0000          |
| P         | Mz   | Treated Lt II | Native Lt II | 225.0170                            | 7  | <.0001* | <.0001*         |
| P         | Mz   | Treated Lt    | Native Lt I  |                                     |    |         | 0.3200          |
| P         | Mz   | Treated Mt    | Native Mt    |                                     |    |         | 0.3182          |
| P         | Mz   | Treated Ct    | Native Ct    |                                     |    |         | 1.0000          |
| P         | Wz   | Treated Lt II | Native Lt II | 234.2701                            | 7  | <.0001* | <.0001*         |
| P         | Wz   | Treated Lt    | Native Lt I  |                                     |    |         | 1.0000          |
| P         | Wz   | Treated Mt    | Native Mt    |                                     |    |         | 0.3242          |
| P         | Wz   | Treated Ct    | Native Ct    |                                     |    |         | 1.0000          |
| S         | Rs   | Treated Lt II | Native Lt II | 26.8493                             | 7  | 0.0004* | 0.1210          |
| S         | Rs   | Treated Lt I  | Native Lt I  |                                     |    |         | 0.0082*         |
| S         | Rs   | Treated Mt    | Native Mt    |                                     |    |         | 0.0008*         |
| S         | Rs   | Treated Ct    | Native Ct    |                                     |    |         | 1.0000          |
| S         | Mz   | Treated Lt II | Native Lt II | 140.8061                            | 7  | <.0001* | <.0001*         |
| S         | Mz   | Treated Lt I  | Native Lt I  |                                     |    |         | <.0001*         |
| S         | Mz   | Treated Mt    | Native Mt    |                                     |    |         | <.0001*         |
| S         | Mz   | Treated Ct    | Native Ct    |                                     |    |         | <.0001*         |
| S         | Wz   | Treated Lt II | Native Lt II | 95.4550                             | 7  | <.0001* | <.0001*         |
| S         | Wz   | Treated Lt I  | Native Lt I  |                                     |    |         | 1.0000          |
| S         | Wz   | Treated Mt    | Native Mt    |                                     |    |         | 1.0000          |
| S         | Wz   | Treated Ct    | Native Ct    |                                     |    |         | 1.0000          |
| Cl        | Rs   | Treated Lt II | Native Lt II | 8.1071                              | 7  | 0.3232  | 1.0000          |
| Cl        | Rs   | Treated Lt I  | Native Lt I  |                                     |    |         | 0.3156          |
| Cl        | Rs   | Treated Mt    | Native Mt    |                                     |    |         | 1.0000          |
| Cl        | Rs   | Treated Ct    | Native Ct    |                                     |    |         | 1.0000          |
| Cl        | Mz   | Treated Lt II | Native Lt II | 33.6396                             | 7  | <.0001* | 0.0027*         |
| Cl        | Mz   | Treated Lt I  | Native Lt I  |                                     |    |         | 0.0338*         |
| Cl        | Mz   | Treated Mt    | Native Mt    |                                     |    |         | 0.0064*         |
| Cl        | Mz   | Treated Ct    | Native Ct    |                                     |    |         | 0.1608          |
| Cl        | Wz   | Treated Lt II | Native Lt II | 16.2127                             | 7  | 0.0232* | 1.0000          |
| Cl        | Wz   | Treated Lt I  | Native Lt I  |                                     |    |         | 1.0000          |
| Cl        | Wz   | Treated Mt    | Native Mt    |                                     |    |         | 1.0000          |
| Cl        | Wz   | Treated Ct    | Native Ct    |                                     |    |         | 1.0000          |

|              |    |                   |                   |                                     |    |         |                 |
|--------------|----|-------------------|-------------------|-------------------------------------|----|---------|-----------------|
| K            | Rs | Treated Lt II     | Native Lt II      |                                     |    |         | 1.0000          |
| K            | Rs | Treated Lt I      | Native Lt I       | 16.2307                             | 7  | 0.0231* | 1.0000          |
| K            | Rs | Treated Mt        | Native Mt         |                                     |    |         | 1.0000          |
| K            | Rs | Treated Ct        | Native Ct         |                                     |    |         | 0.9919          |
| K            | Mz | Treated Lt II     | Native Lt II      | 0.0000                              | 7  | 1.0000  | 1.0000          |
| K            | Mz | Treated Lt I      | Native Lt I       |                                     |    |         | 1.0000          |
| K            | Mz | Treated Mt        | Native Mt         |                                     |    |         | 1.0000          |
| K            | Mz | Treated Ct        | Native Ct         |                                     |    |         | 1.0000          |
| K            | Wz | Treated Lt II     | Native Lt II      | 27.4261                             | 7  | 0.0003* | 0.0511          |
| K            | Wz | Treated Lt I      | Native Lt I       |                                     |    |         | 1.0000          |
| K            | Wz | Treated Mt        | Native Mt         |                                     |    |         | 0.9887          |
| K            | Wz | Treated Ct        | Native Ct         |                                     |    |         | 0.5609          |
| Ca           | Rs | Treated Lt II     | Native Lt II      | 593.3227                            | 7  | <.0001* | <.0001*         |
| Ca           | Rs | Treated Lt I      | Native Lt I       |                                     |    |         | 0.0470*         |
| Ca           | Rs | Treated Mt        | Native Mt         |                                     |    |         | <.0001*         |
| Ca           | Rs | Treated Ct        | Native Ct         |                                     |    |         | 0.1224          |
| Ca           | Mz | Treated Lt II     | Native Lt II      | 1004.2683                           | 7  | <.0001* | <.0001*         |
| Ca           | Mz | Treated Lt I      | Native Lt I       |                                     |    |         | <.0001*         |
| Ca           | Mz | Treated Mt        | Native Mt         |                                     |    |         | <.0001*         |
| Ca           | Mz | Treated Ct        | Native Ct         |                                     |    |         | <.0001*         |
| Ca           | Wz | Treated Lt II     | Native Lt II      | 754.4791                            | 7  | <.0001* | <.0001*         |
| Ca           | Wz | Treated Lt I      | Native Lt I       |                                     |    |         | <.0001*         |
| Ca           | Wz | Treated Mt        | Native Mt         |                                     |    |         | <.0001*         |
| Ca           | Wz | Treated Ct        | Native Ct         |                                     |    |         | <.0001*         |
| Fe           | Rs | Treated Lt II     | Native Lt II      | 325.5845                            | 7  | <.0001* | 0.8961          |
| Fe           | Rs | Treated Lt I      | Native Lt I       |                                     |    |         | 0.9801          |
| Fe           | Rs | Treated Mt        | Native Mt         |                                     |    |         | 0.9978          |
| Fe           | Rs | Treated Ct        | Native Ct         |                                     |    |         | 0.9712          |
| Fe           | Mz | Treated Lt II     | Native Lt II      | 1236.4760                           | 7  | <.0001* | 0.7292          |
| Fe           | Mz | Treated Lt I      | Native Lt I       |                                     |    |         | 1.0000          |
| Fe           | Mz | Treated Mt        | Native Mt         |                                     |    |         | 0.9985          |
| Fe           | Mz | Treated Ct        | Native Ct         |                                     |    |         | 0.2586          |
| Fe           | Wz | Treated Lt II     | Native Lt II      | 1112.1097                           | 7  | <.0001* | 0.0703          |
| Fe           | Wz | Treated Lt I      | Native Lt I       |                                     |    |         | 1.0000          |
| Fe           | Wz | Treated Mt        | Native Mt         |                                     |    |         | 0.9868          |
| Fe           | Wz | Treated Ct        | Native Ct         |                                     |    |         | 0.7406          |
| All elements | Rs | Treated Lt II     | Native Lt II      | 481.9565                            | 7  | <.0001* | <.0001*         |
| All elements | Rs | Treated Lt I      | Native Lt I       |                                     |    |         | 0.0813          |
| All elements | Rs | Treated Mt        | Native Mt         |                                     |    |         | <.0001*         |
| All elements | Rs | Treated Ct        | Native Ct         |                                     |    |         | 0.2509          |
| All elements | Mz | Treated Lt II     | Native Lt II      | 1012.9077                           | 7  | <.0001* | <.0001*         |
| All elements | Mz | Treated Lt I      | Native Lt I       |                                     |    |         | <.0001*         |
| All elements | Mz | Treated Mt        | Native Mt         |                                     |    |         | <.0001*         |
| All elements | Mz | Treated Ct        | Native Ct         |                                     |    |         | <.0001*         |
| All elements | Wz | Treated Lt II     | Native Lt II      | 859.6170                            | 7  | <.0001* | <.0001*         |
| All elements | Wz | Treated Lt I      | Native Lt I       |                                     |    |         | <.0001*         |
| All elements | Wz | Treated Mt        | Native Mt         |                                     |    |         | <.0001*         |
| All elements | Wz | Treated Ct        | Native Ct         |                                     |    |         | <.0001*         |
|              |    |                   |                   | Results from ANOVA                  |    |         | Tukey-Kramer    |
|              |    |                   |                   | F ratio                             | df | p-value | p-value         |
| H            | Rs | Treated Lt II     | Native Lt II      | 81.7399                             | 7  | <.0001* | <.0001*         |
| H            | Rs | Treated Lt I      | Native Lt I       |                                     |    |         | 0.8501          |
| H            | Rs | Treated Mt        | Native Mt         |                                     |    |         | <.0001*         |
| H            | Rs | Treated Ct        | Native Ct         |                                     |    |         | 0.6828          |
| E            | Rs | Treated Lt II     | Native Lt II      | 77.7588                             | 7  | <.0001* | <.0001*         |
| E            | Rs | Treated Lt I      | Native Lt I       |                                     |    |         | 0.8421          |
| E            | Rs | Treated Mt        | Native Mt         |                                     |    |         | <.0001*         |
| E            | Rs | Treated Ct        | Native Ct         |                                     |    |         | 0.6470          |
| H            | Mz | Treated Lt II     | Native Lt II      | 376.0661                            | 7  | <.0001* | <.0001*         |
| H            | Mz | Treated Lt I      | Native Lt I       |                                     |    |         | 0.0019*         |
| H            | Mz | Treated Mt        | Native Mt         |                                     |    |         | <.0001*         |
| H            | Mz | Treated Ct        | Native Ct         |                                     |    |         | 0.1909          |
| E            | Mz | Treated Lt II     | Native Lt II      | 289.1062                            | 7  | <.0001* | <.0001*         |
| E            | Mz | Treated Lt I      | Native Lt I       |                                     |    |         | 0.0066*         |
| E            | Mz | Treated Mt        | Native Mt         |                                     |    |         | <.0001*         |
| E            | Mz | Treated Ct        | Native Ct         |                                     |    |         | 0.3164          |
| H            | Wz | Treated Lt II     | Native Lt II      | 184.4595                            | 7  | <.0001* | <.0001*         |
| H            | Wz | Treated Lt I      | Native Lt I       |                                     |    |         | <.0001*         |
| H            | Wz | Treated Mt        | Native Mt         |                                     |    |         | <.0001*         |
| H            | Wz | Treated Ct        | Native Ct         |                                     |    |         | 0.0003*         |
| E            | Wz | Treated Lt II     | Native Lt II      | 151.8233                            | 7  | <.0001* | <.0001*         |
| E            | Wz | Treated Lt I      | Native Lt I       |                                     |    |         | <.0001*         |
| E            | Wz | Treated Mt        | Native Mt         |                                     |    |         | <.0001*         |
| E            | Wz | Treated Ct        | Native Ct         |                                     |    |         | 0.0008*         |
|              |    |                   |                   | 1-Way Test, ChiSquare approximation |    |         | Wilcoxon method |
|              |    |                   |                   | ChiSquare                           | df | p-value | p-value         |
| Bf           | Rs | Native dry Lt II  | Native wet Lt II  | 318.5840                            | 15 | <.0001* | <.0001*         |
| Bf           | Rs | Native dry Lt I   | Native wet Lt I   |                                     |    |         | <.0001*         |
| Bf           | Rs | Native dry Mt     | Native wet Mt     |                                     |    |         | <.0001*         |
| Bf           | Rs | Native dry Ct     | Native wet Ct     |                                     |    |         | 0.0010*         |
| Bf           | Rs | Treated dry Lt II | Treated wet Lt II |                                     |    |         | <.0001*         |
| Bf           | Rs | Treated dry Lt I  | Treated wet Lt I  |                                     |    |         | <.0001*         |



|    |    |                   |                   |  |  |  |          |
|----|----|-------------------|-------------------|--|--|--|----------|
| Bf | Rs | Treated dry Mt    | Treated wet Mt    |  |  |  | <.0001*  |
| Bf | Rs | Treated dry Ct    | Treated wet Ct    |  |  |  | 0.0018*  |
| Bf | Rs | Native dry Lt II  | Treated dry Lt II |  |  |  | <.00015* |
| Bf | Rs | Native dry Lt I   | Treated dry Lt I  |  |  |  | <.0001*  |
| Bf | Rs | Native dry Mt     | Treated dry Mt    |  |  |  | <.0001*  |
| Bf | Rs | Native dry Ct     | Treated dry Ct    |  |  |  | 0.0006*  |
| Bf | Rs | Native wet Lt II  | Treated wet Lt II |  |  |  | 0.0451*  |
| Bf | Rs | Native wet Lt I   | Treated wet Lt I  |  |  |  | 0.2231   |
| Bf | Rs | Native wet Mt     | Treated wet Mt    |  |  |  | 0.0657   |
| Bf | Rs | Native wet Ct     | Treated wet Ct    |  |  |  | 0.1658   |
| Bf | Mz | Native dry Lt II  | Native wet Lt II  |  |  |  | <.0001*  |
| Bf | Mz | Native dry Lt I   | Native wet Lt I   |  |  |  | <.0001*  |
| Bf | Mz | Native dry Mt     | Native wet Mt     |  |  |  | <.0001*  |
| Bf | Mz | Native dry Ct     | Native wet Ct     |  |  |  | 0.0003*  |
| Bf | Mz | Treated dry Lt II | Treated wet Lt II |  |  |  | <.0001*  |
| Bf | Mz | Treated dry Lt I  | Treated wet Lt I  |  |  |  | <.0001*  |
| Bf | Mz | Treated dry Mt    | Treated wet Mt    |  |  |  | <.0001*  |
| Bf | Mz | Treated dry Ct    | Treated wet Ct    |  |  |  | 0.0074*  |
| Bf | Mz | Native dry Lt II  | Treated dry Lt II |  |  |  | <.0001*  |
| Bf | Mz | Native dry Lt I   | Treated dry Lt I  |  |  |  | <.0001*  |
| Bf | Mz | Native dry Mt     | Treated dry Mt    |  |  |  | <.0001*  |
| Bf | Mz | Native dry Ct     | Treated dry Ct    |  |  |  | 0.0101*  |
| Bf | Mz | Native wet Lt II  | Treated wet Lt II |  |  |  | 0.0021*  |
| Bf | Mz | Native wet Lt I   | Treated wet Lt I  |  |  |  | 0.4597   |
| Bf | Mz | Native wet Mt     | Treated wet Mt    |  |  |  | 0.0366*  |
| Bf | Mz | Native wet Ct     | Treated wet Ct    |  |  |  | 0.0227*  |
| Bf | Wz | Native dry Lt II  | Native wet Lt II  |  |  |  | <.0001*  |
| Bf | Wz | Native dry Lt I   | Native wet Lt I   |  |  |  | <.0001*  |
| Bf | Wz | Native dry Mt     | Native wet Mt     |  |  |  | 0.0013*  |
| Bf | Wz | Native dry Ct     | Native wet Ct     |  |  |  | <.0001*  |
| Bf | Wz | Treated dry Lt II | Treated wet Lt II |  |  |  | <.0001*  |
| Bf | Wz | Treated dry Lt I  | Treated wet Lt I  |  |  |  | <.0001*  |
| Bf | Wz | Treated dry Mt    | Treated wet Mt    |  |  |  | <.0001*  |
| Bf | Wz | Treated dry Ct    | Treated wet Ct    |  |  |  | <.0001*  |
| Bf | Wz | Native dry Lt II  | Treated dry Lt II |  |  |  | <.0001*  |
| Bf | Wz | Native dry Lt I   | Treated dry Lt I  |  |  |  | 0.0097*  |
| Bf | Wz | Native dry Mt     | Treated dry Mt    |  |  |  | <.0001*  |
| Bf | Wz | Native dry Ct     | Treated dry Ct    |  |  |  | 0.0004*  |
| Bf | Wz | Native wet Lt II  | Treated wet Lt II |  |  |  | <.0001*  |
| Bf | Wz | Native wet Lt I   | Treated wet Lt I  |  |  |  | 0.1092   |
| Bf | Wz | Native wet Mt     | Treated wet Mt    |  |  |  | 0.0015*  |
| Bf | Wz | Native wet Ct     | Treated wet Ct    |  |  |  | 0.5964   |
| Bs | Rs | Native dry Lt II  | Native wet Lt II  |  |  |  | <.0001*  |
| Bs | Rs | Native dry Mt     | Native wet Mt     |  |  |  | <.0001*  |
| Bs | Rs | Treated dry Lt II | Treated wet Lt II |  |  |  | <.0001*  |
| Bs | Rs | Treated dry Mt    | Treated wet Mt    |  |  |  | 0.0127*  |
| Bs | Rs | Native dry Lt II  | Treated dry Lt II |  |  |  | 0.0004*  |
| Bs | Rs | Native dry Mt     | Treated dry Mt    |  |  |  | <.0001*  |
| Bs | Rs | Native wet Lt II  | Treated wet Lt II |  |  |  | 0.0962   |
| Bs | Rs | Native wet Mt     | Treated wet Mt    |  |  |  | 0.0047*  |
| Bs | Mz | Native dry Lt II  | Native wet Lt II  |  |  |  | <.0001*  |
| Bs | Mz | Native dry Mt     | Native wet Mt     |  |  |  | 0.4187   |
| Bs | Mz | Treated dry Lt II | Treated wet Lt II |  |  |  | <.0001*  |
| Bs | Mz | Treated dry Mt    | Treated wet Mt    |  |  |  | <.0001*  |
| Bs | Mz | Native dry Lt II  | Treated dry Lt II |  |  |  | 0.0001*  |
| Bs | Mz | Native dry Mt     | Treated dry Mt    |  |  |  | <.0001*  |
| Bs | Mz | Native wet Lt II  | Treated wet Lt II |  |  |  | <.0001*  |
| Bs | Mz | Native wet Mt     | Treated wet Mt    |  |  |  | <.0001*  |
| Bs | Wz | Native dry Lt II  | Native wet Lt II  |  |  |  | <.0001*  |
| Bs | Wz | Native dry Mt     | Native wet Mt     |  |  |  | 0.7909   |
| Bs | Wz | Treated dry Lt II | Treated wet Lt II |  |  |  | <.0001*  |
| Bs | Wz | Treated dry Mt    | Treated wet Mt    |  |  |  | <.0001*  |
| Bs | Wz | Native dry Lt II  | Treated dry Lt II |  |  |  | 0.0099*  |
| Bs | Wz | Native dry Mt     | Treated dry Mt    |  |  |  | <.0001*  |
| Bs | Wz | Native wet Lt II  | Treated wet Lt II |  |  |  | <.0001*  |
| Bs | Wz | Native wet Mt     | Treated wet Mt    |  |  |  | <.0001*  |

**Supplementary Table 9.** Percentage of different failure types (sorted to the area, where failure occurred) of each tooth type during breaking stress experiments. Sorted to radular zones, native and treated, tested under dry or wet condition. Quantity of experiments resulting in this specific failure type (*n*) and the percentage of this particular type are given.

| Condition | Tooth type | Dry or wet | Zone                | <i>n</i> | Failure type or area of failure |                     |                           |                |                          |            |                   |
|-----------|------------|------------|---------------------|----------|---------------------------------|---------------------|---------------------------|----------------|--------------------------|------------|-------------------|
|           |            |            |                     |          | %                               | No failing, bending | Failure close to membrane | Failure, crush | Failure at junction zone | No failure | Failure at stylus |
| Native    | Marginal   | Wet        | Working zone        | <i>n</i> | 21                              | 11                  | 0                         | 0              | 0                        | 8          | 0                 |
|           |            |            |                     | %        | 52.50                           | 27.50               | 0.00                      | 0.00           | 0.00                     | 20.00      | 0.00              |
| Native    | Marginal   | Wet        | Mineralization zone | <i>n</i> | 28                              | 6                   | 0                         | 0              | 2                        | 8          | 0                 |
|           |            |            |                     | %        | 63.64                           | 13.64               | 0.00                      | 0.00           | 4.55                     | 18.18      | 0.00              |
| Native    | Marginal   | Wet        | Radular sac         | <i>n</i> | 37                              | 7                   | 0                         | 0              | 0                        | 4          | 0                 |
|           |            |            |                     | %        | 77.08                           | 14.58               | 0.00                      | 0.00           | 0.00                     | 8.33       | 0.00              |
| Native    | Marginal   | Dry        | Working zone        | <i>n</i> | 0                               | 39                  | 0                         | 0              | 0                        | 0          | 0                 |
|           |            |            |                     | %        | 0.00                            | 100.00              | 0.00                      | 0.00           | 0.00                     | 0.00       | 0.00              |
| Native    | Marginal   | Dry        | Mineralization zone | <i>n</i> | 0                               | 44                  | 0                         | 0              | 0                        | 0          | 0                 |
|           |            |            |                     | %        | 0.00                            | 100.00              | 0.00                      | 0.00           | 0.00                     | 0.00       | 0.00              |
| Native    | Marginal   | Dry        | Radular sac         | <i>n</i> | 0                               | 42                  | 0                         | 0              | 0                        | 0          | 0                 |
|           |            |            |                     | %        | 0.00                            | 100.00              | 0.00                      | 0.00           | 0.00                     | 0.00       | 0.00              |
| Native    | Lateral II | Wet        | Working zone        | <i>n</i> | 0                               | 0                   | 0                         | 0              | 0                        | 0          | 39                |
|           |            |            |                     | %        | 0.00                            | 0.00                | 0.00                      | 0.00           | 0.00                     | 0.00       | 100.00            |
| Native    | Lateral II | Wet        | Mineralization zone | <i>n</i> | 0                               | 0                   | 0                         | 0              | 0                        | 0          | 42                |
|           |            |            |                     | %        | 0.00                            | 0.00                | 0.00                      | 0.00           | 0.00                     | 0.00       | 100.00            |
| Native    | Lateral II | Wet        | Radular sac         | <i>n</i> | 17                              | 0                   | 0                         | 0              | 0                        | 0          | 30                |
|           |            |            |                     | %        | 36.17                           | 0.00                | 0.00                      | 0.00           | 0.00                     | 0.00       | 63.83             |
| Native    | Lateral II | Dry        | Working zone        | <i>n</i> | 0                               | 0                   | 0                         | 39             | 0                        | 0          | 0                 |
|           |            |            |                     | %        | 0.00                            | 0.00                | 0.00                      | 100.00         | 0.00                     | 0.00       | 0.00              |
| Native    | Lateral II | Dry        | Mineralization zone | <i>n</i> | 0                               | 0                   | 0                         | 42             | 0                        | 0          | 0                 |
|           |            |            |                     | %        | 0.00                            | 0.00                | 0.00                      | 100.00         | 0.00                     | 0.00       | 0.00              |
| Native    | Lateral II | Dry        | Radular sac         | <i>n</i> | 0                               | 0                   | 23                        | 24             | 0                        | 0          | 0                 |
|           |            |            |                     | %        | 0.00                            | 0.00                | 48.94                     | 51.06          | 0.00                     | 0.00       | 0.00              |
| Native    | Lateral I  | Wet        | Working zone        | <i>n</i> | 21                              | 11                  | 0                         | 0              | 0                        | 8          | 0                 |
|           |            |            |                     | %        | 52.50                           | 27.50               | 0.00                      | 0.00           | 0.00                     | 20.00      | 0.00              |
| Native    | Lateral I  | Wet        | Mineralization zone | <i>n</i> | 28                              | 6                   | 0                         | 0              | 2                        | 8          | 0                 |
|           |            |            |                     | %        | 63.64                           | 13.64               | 0.00                      | 0.00           | 4.55                     | 18.18      | 0.00              |
| Native    | Lateral I  | Wet        | Radular sac         | <i>n</i> | 37                              | 7                   | 0                         | 0              | 0                        | 4          | 0                 |
|           |            |            |                     | %        | 77.08                           | 14.58               | 0.00                      | 0.00           | 0.00                     | 8.33       | 0.00              |
| Native    | Lateral I  | Dry        | Working zone        | <i>n</i> | 0                               | 0                   | 39                        | 0              | 0                        | 0          | 0                 |
|           |            |            |                     | %        | 0.00                            | 0.00                | 100.00                    | 0.00           | 0.00                     | 0.00       | 0.00              |
| Native    | Lateral I  | Dry        | Mineralization zone | <i>n</i> | 0                               | 0                   | 44                        | 0              | 0                        | 0          | 0                 |
|           |            |            |                     | %        | 0.00                            | 0.00                | 100.00                    | 0.00           | 0.00                     | 0.00       | 0.00              |
| Native    | Lateral I  | Dry        | Radular sac         | <i>n</i> | 0                               | 0                   | 45                        | 0              | 0                        | 0          | 0                 |
|           |            |            |                     | %        | 0.00                            | 0.00                | 100.00                    | 0.00           | 0.00                     | 0.00       | 0.00              |
| Native    | Central    | Wet        | Working zone        | <i>n</i> | 11                              | 5                   | 0                         | 0              | 0                        | 4          | 0                 |
|           |            |            |                     | %        | 55.00                           | 25.00               | 0.00                      | 0.00           | 0.00                     | 20.00      | 0.00              |
| Native    | Central    | Wet        | Mineralization zone | <i>n</i> | 14                              | 3                   | 0                         | 0              | 1                        | 4          | 0                 |
|           |            |            |                     | %        | 63.64                           | 13.64               | 0.00                      | 0.00           | 4.55                     | 18.18      | 0.00              |
| Native    | Central    | Wet        | Radular sac         | <i>n</i> | 18                              | 4                   | 0                         | 0              | 2                        | 0          | 0                 |
|           |            |            |                     | %        | 75.00                           | 16.67               | 0.00                      | 0.00           | 8.33                     | 0.00       | 0.00              |
| Native    | Central    | Dry        | Working zone        | <i>n</i> | 0                               | 0                   | 19                        | 0              | 0                        | 0          | 0                 |
|           |            |            |                     | %        | 0.00                            | 0.00                | 100.00                    | 0.00           | 0.00                     | 0.00       | 0.00              |
| Native    | Central    | Dry        | Mineralization zone | <i>n</i> | 0                               | 0                   | 21                        | 0              | 0                        | 0          | 0                 |
|           |            |            |                     | %        | 0.00                            | 0.00                | 100.00                    | 0.00           | 0.00                     | 0.00       | 0.00              |
| Native    | Central    | Dry        | Radular sac         | <i>n</i> | 0                               | 0                   | 24                        | 0              | 0                        | 0          | 0                 |
|           |            |            |                     | %        | 0.00                            | 0.00                | 100.00                    | 0.00           | 0.00                     | 0.00       | 0.00              |
| Treated   | Marginal   | Wet        | Working zone        | <i>n</i> | 20                              | 11                  | 0                         | 0              | 0                        | 8          | 0                 |
|           |            |            |                     | %        | 51.28                           | 28.00               | 0.00                      | 0.00           | 0.00                     | 20.72      | 0.00              |
| Treated   | Marginal   | Wet        | Mineralization zone | <i>n</i> | 26                              | 6                   | 0                         | 0              | 2                        | 6          | 0                 |
|           |            |            |                     | %        | 65.00                           | 15.00               | 0.00                      | 0.00           | 5.00                     | 15.00      | 0.00              |
| Treated   | Marginal   | Wet        | Radular sac         | <i>n</i> | 39                              | 7                   | 0                         | 0              | 0                        | 4          | 0                 |
|           |            |            |                     | %        | 78.00                           | 14.00               | 0.00                      | 0.00           | 0.00                     | 8.00       | 0.00              |
| Treated   | Marginal   | Dry        | Working zone        | <i>n</i> | 0                               | 39                  | 0                         | 0              | 0                        | 0          | 0                 |
|           |            |            |                     | %        | 0.00                            | 100.00              | 0.00                      | 0.00           | 0.00                     | 0.00       | 0.00              |
| Treated   | Marginal   | Dry        | Mineralization zone | <i>n</i> | 0                               | 41                  | 0                         | 0              | 0                        | 0          | 0                 |
|           |            |            |                     | %        | 0.00                            | 100.00              | 0.00                      | 0.00           | 0.00                     | 0.00       | 0.00              |
| Treated   | Marginal   | Dry        | Radular sac         | <i>n</i> | 0                               | 43                  | 0                         | 0              | 0                        | 0          | 0                 |
|           |            |            |                     | %        | 0.00                            | 100.00              | 0.00                      | 0.00           | 0.00                     | 0.00       | 0.00              |
| Treated   | Lateral II | Wet        | Working zone        | <i>n</i> | 0                               | 0                   | 0                         | 0              | 0                        | 0          | 40                |
|           |            |            |                     | %        | 0.00                            | 0.00                | 0.00                      | 0.00           | 0.00                     | 0.00       | 100.00            |

|         |            |     |                     |               |             |            |              |              |           |            |              |
|---------|------------|-----|---------------------|---------------|-------------|------------|--------------|--------------|-----------|------------|--------------|
| Treated | Lateral II | Wet | Mineralization zone | <i>n</i><br>% | 0<br>0.00   | 0<br>0.00  | 0<br>0.00    | 0<br>0.00    | 0<br>0.00 | 0<br>0.00  | 41<br>100.00 |
| Treated | Lateral II | Wet | Radular sac         | <i>n</i><br>% | 17<br>36.17 | 0<br>0.00  | 0<br>0.00    | 0<br>0.00    | 0<br>0.00 | 0<br>0.00  | 30<br>63.83  |
| Treated | Lateral II | Dry | Working zone        | <i>n</i><br>% | 0<br>0.00   | 0<br>0.00  | 0<br>0.00    | 39<br>100.00 | 0<br>0.00 | 0<br>0.00  | 0<br>0.00    |
| Treated | Lateral II | Dry | Mineralization zone | <i>n</i><br>% | 0<br>0.00   | 0<br>0.00  | 0<br>0.00    | 38<br>100.00 | 0<br>0.00 | 0<br>0.00  | 0<br>0.00    |
| Treated | Lateral II | Dry | Radular sac         | <i>n</i><br>% | 0<br>0.00   | 0<br>0.00  | 24<br>48.94  | 25<br>51.06  | 0<br>0.00 | 0<br>0.00  | 0<br>0.00    |
| Treated | Lateral I  | Wet | Working zone        | <i>n</i><br>% | 27<br>69.23 | 9<br>23.08 | 0<br>0.00    | 0<br>0.00    | 0<br>0.00 | 3<br>7.69  | 0<br>0.00    |
| Treated | Lateral I  | Wet | Mineralization zone | <i>n</i><br>% | 30<br>71.43 | 4<br>9.52  | 0<br>0.00    | 0<br>0.00    | 1<br>2.38 | 7<br>16.67 | 0<br>0.00    |
| Treated | Lateral I  | Wet | Radular sac         | <i>n</i><br>% | 37<br>78.72 | 7<br>14.89 | 0<br>0.00    | 0<br>0.00    | 0<br>0.00 | 3<br>6.38  | 0<br>0.00    |
| Treated | Lateral I  | Dry | Working zone        | <i>n</i><br>% | 0<br>0.00   | 0<br>0.00  | 35<br>100.00 | 0<br>0.00    | 0<br>0.00 | 0<br>0.00  | 0<br>0.00    |
| Treated | Lateral I  | Dry | Mineralization zone | <i>n</i><br>% | 0<br>0.00   | 0<br>0.00  | 44<br>100.00 | 0<br>0.00    | 0<br>0.00 | 0<br>0.00  | 0<br>0.00    |
| Treated | Lateral I  | Dry | Radular sac         | <i>n</i><br>% | 0<br>0.00   | 0<br>0.00  | 42<br>100.00 | 0<br>0.00    | 0<br>0.00 | 0<br>0.00  | 0<br>0.00    |
| Treated | Central    | Wet | Working zone        | <i>n</i><br>% | 10<br>52.63 | 6<br>31.58 | 0<br>0.00    | 0<br>0.00    | 0<br>0.00 | 3<br>15.79 | 0<br>0.00    |
| Treated | Central    | Wet | Mineralization zone | <i>n</i><br>% | 16<br>80.00 | 1<br>5.00  | 0<br>0.00    | 0<br>0.00    | 1<br>5.00 | 2<br>10.00 | 0<br>0.00    |
| Treated | Central    | Wet | Radular sac         | <i>n</i><br>% | 20<br>83.33 | 3<br>12.50 | 0<br>0.00    | 0<br>0.00    | 0<br>0.00 | 1<br>4.17  | 0<br>0.00    |
| Treated | Central    | Dry | Working zone        | <i>n</i><br>% | 0<br>0.00   | 0<br>0.00  | 19<br>100.00 | 0<br>0.00    | 0<br>0.00 | 0<br>0.00  | 0<br>0.00    |
| Treated | Central    | Dry | Mineralization zone | <i>n</i><br>% | 0<br>0.00   | 0<br>0.00  | 17<br>100.00 | 0<br>0.00    | 0<br>0.00 | 0<br>0.00  | 0<br>0.00    |
| Treated | Central    | Dry | Radular sac         | <i>n</i><br>% | 0<br>0.00   | 0<br>0.00  | 24<br>100.00 | 0<br>0.00    | 0<br>0.00 | 0<br>0.00  | 0<br>0.00    |

**Supplementary Table 10. For each tooth type and tooth part sorted to condition (native or treated) and radular zone (Mz, mineralization zone; Rs, radular sac; Wz, working zone). Mean (M), standard deviation (Sd), and quantity of analysed tooth areas (n) for the following parameters (P) are shown: proportions, given in %, of Te ('trace elements' = sum of Na, Mg, Si, P, S, Cl, K), Ca, Fe; Young's modulus (E), and hardness (H), given in GPa. ANOVA or t test were carried out to detect differences between tooth areas of each tooth type in each radular zone (orange p-values = highly significant, red = significant). U, unit of measure.**

| Condition | Zone | Parameter | U   | Central tooth |     |   |        |     |   |         |    |         |    | Lateral tooth I |     |   |        |     |         |        |         |   |       | Lateral tooth II |       |       |        |        |     |       |         |     |         | Marginal tooth |       |     |        |       |        |        |     |     |         |     |         |     |       |     |        |       |        |        |
|-----------|------|-----------|-----|---------------|-----|---|--------|-----|---|---------|----|---------|----|-----------------|-----|---|--------|-----|---------|--------|---------|---|-------|------------------|-------|-------|--------|--------|-----|-------|---------|-----|---------|----------------|-------|-----|--------|-------|--------|--------|-----|-----|---------|-----|---------|-----|-------|-----|--------|-------|--------|--------|
|           |      |           |     | Cusp          |     |   | Stylus |     |   | T test  |    |         |    | Cusp            |     |   | Stylus |     |         | T test |         |   |       | Cusp             |       |       | Stylus |        |     | ANOVA |         |     |         | Cusp           |       |     | Stylus |       |        | ANOVA  |     |     |         |     |         |     |       |     |        |       |        |        |
|           |      |           |     | M             | Sd  | n | M      | Sd  | n | t ratio | df | p-value | M  | Sd              | n   | M | Sd     | n   | t ratio | df     | p-value | M | Sd    | n                | M     | Sd    | n      | M      | Sd  | n     | F Ratio | df  | p-value | M              | Sd    | n   | M      | Sd    | n      | M      | Sd  | n   | F Ratio | df  | p-value |     |       |     |        |       |        |        |
| Native    | Rs   | H         | GPa | 0.3           | 0.0 | 3 | 0.3    | 0.0 | 3 | 0.573   | 67 | 0.573   | 67 | 0.71            | 0.3 | 7 | 0.0    | 0.4 | 1       | 0.3    | 0.0     | 7 | 0.3   | 0.0              | 7     | 1.869 | 141    | 0.03   | 1.2 | 0.6   | 7       | 0.4 | 0.2     | 6              | 0.8   | 0.3 | 7      | 48.71 | 2      | <0.01* | 0.5 | 0.2 | 7       | 0.4 | 0.1     | 7   | 0.4   | 0.1 | 7      | 8.298 | 2      | 0.00   |
| Native    | Rs   | E         | GPa | 2.6           | 0.1 | 3 | 2.6    | 0.1 | 3 | 0.574   | 66 | 0.574   | 66 | 0.71            | 2.8 | 3 | 0.3    | 2.6 | 1       | 2.6    | 0.1     | 7 | 2.6   | 0.1              | 7     | 3.737 | 107.4  | 0.00   | 9.4 | 4.8   | 7       | 3.7 | 1.6     | 6              | 6.7   | 3.1 | 7      | 47.75 | 2      | <0.01* | 4.3 | 2.0 | 7       | 3.6 | 1.3     | 7   | 3.4   | 1.2 | 7      | 5.834 | 2      | 0.00   |
| Native    | Rs   | Fe        | %   | 0.0           | 0.0 | 3 | 0.0    | 0.1 | 3 | 0.258   | 59 | 0.258   | 59 | 0.60            | 0.0 | 7 | 0.0    | 0.1 | 7       | 0.0    | 0.1     | 7 | 0.0   | 0.1              | 7     | 0.016 | 127.3  | 0.49   | 2.1 | 2.7   | 7       | 0.1 | 0.2     | 6              | 0.0   | 0.1 | 7      | 38.14 | 2      | <0.01* | 0.0 | 0.1 | 7       | 0.0 | 0.2     | 7   | 0.0   | 0.0 | 7      | 1.668 | 2      | 0.19   |
| Native    | Rs   | Ca        | %   | 0.0           | 0.2 | 3 | 0.1    | 0.3 | 3 | 0.451   | 65 | 0.451   | 65 | 0.67            | 0.0 | 7 | 0.2    | 0.0 | 7       | 0.0    | 0.0     | 7 | 0.0   | 0.0              | 7     | 1.946 | 70     | 0.02   | 1.2 | 1.2   | 7       | 0.6 | 1.1     | 6              | 1.7   | 1.1 | 7      | 16.33 | 2      | <0.01* | 0.2 | 0.5 | 7       | 0.2 | 0.4     | 7   | 0.1   | 0.2 | 7      | 1.062 | 2      | 0.34   |
| Native    | Rs   | Te        | %   | 0             | 0   | 3 | 0.0    | 0.0 | 3 | 1       | 34 | 1       | 34 | 0.83            | 0.0 | 7 | 0.0    | 0.2 | 7       | 0.0    | 0.2     | 7 | 0.0   | 0.2              | 7     | 1.140 | 95.42  | 0.12   | 0.0 | 0.1   | 7       | 0.1 | 0.5     | 6              | 0.0   | 0.0 | 7      | 6.752 | 2      | 0.00   | 0.0 | 0.0 | 7       | 0.0 | 0.0     | 7   | 0.0   | 0.1 | 7      | 4.650 | 2      | 0.01   |
| Native    | Mz   | H         | GPa | 0.8           | 0.4 | 4 | 0.7    | 0.3 | 4 | 2.162   | 88 | 2.162   | 88 | 0.01            | 0.9 | 8 | 0.4    | 0.7 | 8       | 0.4    | 0.3     | 9 | 0.3   | 0.3              | 9     | 2.952 | 162.6  | 0.00   | 3.0 | 0.4   | 8       | 2.1 | 0.6     | 8              | 0.2   | 0.2 | 8      | 109.1 | 2      | <0.01* | 1.8 | 0.3 | 9       | 1.4 | 0.2     | 8   | 0.8   | 0.4 | 8      | 290.3 | 2      | <0.01* |
| Native    | Mz   | E         | GPa | 7.3           | 3.4 | 4 | 5.9    | 2.6 | 4 | 2.162   | 81 | 2.162   | 81 | 0.01            | 7.5 | 8 | 3.5    | 5.9 | 8       | 2.6    | 3.0     | 9 | 2.6   | 3.0              | 9     | 3.382 | 159.6  | 0.00   | 23. | 3.5   | 8       | 16. | 4.6     | 8              | 16.   | 1.9 | 8      | 111.7 | 2      | <0.01* | 13. | 2.5 | 9       | 12. | 2.4     | 8   | 6.4   | 3.0 | 8      | 255.3 | 2      | <0.01* |
| Native    | Mz   | Fe        | %   | 0.0           | 0.1 | 4 | 5.9    | 2.6 | 4 | 0.275   | 85 | 0.275   | 85 | 0.60            | 0.0 | 8 | 0.0    | 0.0 | 8       | 0.0    | 0.0     | 9 | 0.0   | 0.0              | 9     | 1.419 | 87     | 0.07   | 14. | 5.4   | 8       | 1.9 | 1.7     | 8              | 0.2   | 0.2 | 8      | 505.2 | 2      | <0.01* | 0.0 | 0.0 | 9       | 0.0 | 0.0     | 8   | 0.0   | 0.0 | 8      | 2.039 | 2      | 0.13   |
| Native    | Mz   | Ca        | %   | 0.6           | 0.9 | 4 | 0.0    | 0.1 | 4 | 0.908   | 87 | 0.908   | 87 | 0.18            | 0.1 | 8 | 0.3    | 0.6 | 8       | 1.1    | 1.0     | 9 | 4.334 | 109.7            | 0.03  | 8.2   | 2.6    | 8      | 4.7 | 1.5   | 8       | 2.5 | 1.0     | 8              | 211.9 | 2   | <0.01* | 0.2   | 0.5    | 9      | 0.4 | 0.6 | 8       | 0.1 | 0.3     | 8   | 9.099 | 2   | 0.00   |       |        |        |
| Native    | Mz   | Te        | %   | 0.0           | 0.1 | 4 | 0.0    | 0.1 | 4 | 0.425   | 83 | 0.425   | 83 | 0.66            | 0.0 | 8 | 0.1    | 0.8 | 8       | 0.4    | 0.1     | 9 | 0.1   | 0.9              | 0.514 | 175.1 | 0.30   | 0.4    | 0.7 | 8     | 0.7     | 0.3 | 8       | 0.7            | 0.2   | 8   | 1.141  | 2     | 0.32   | 0.0    | 0.1 | 9   | 0.0     | 0.0 | 8       | 0.3 | 0.3   | 8   | 2.863  | 2     | 0.05   |        |
| Native    | Wz   | H         | GPa | 1.9           | 0.1 | 3 | 0.4    | 1.1 | 3 | 15.23   | 68 | 15.23   | 68 | <0.01*          | 1.9 | 7 | 0.1    | 1.5 | 7       | 0.1    | 0.1     | 7 | 0.1   | 0.4              | 7     | 18.80 | 137.1  | <0.01* | 3.9 | 0.3   | 7       | 2.5 | 0.1     | 7              | 2.2   | 0.1 | 7      | 1159. | 2      | <0.01* | 2.1 | 0.1 | 7       | 1.8 | 0.1     | 7   | 0.9   | 0.0 | 7      | 1544. | 2      | <0.01* |
| Native    | Wz   | E         | GPa | 16.53         | 1.3 | 3 | 1.4    | 0.1 | 3 | 15.81   | 57 | 15.81   | 57 | <0.01*          | 16. | 7 | 1.3    | 12. | 7       | 0.9    | 0.9     | 7 | 0.9   | 0.9              | 22.41 | 130.3 | <0.01* | 30.    | 1.9 | 7     | 19.     | 1.2 | 7       | 17.            | 1.0   | 7   | 1692.  | 2     | <0.01* | 16.    | 1.0 | 7   | 15.     | 0.8 | 7       | 7.5 | 0.6   | 7   | 255.3  | 2     | <0.01* |        |
| Native    | Wz   | Fe        | %   | 0.0           | 0.0 | 3 | 12.    | 0.8 | 3 | 16.10   | 34 | 16.10   | 34 | 0.94            | 0.0 | 7 | 0.0    | 0.0 | 7       | 0.0    | 0.0     | 7 | 0.0   | 0.0              | 7     | 26.   | 2.9    | 7      | 6.3 | 1.0   | 7       | 2.2 | 0.2     | 7              | 4153. | 2   | <0.01* | 0.0   | 0.0    | 7      | 0.0 | 0.0 | 7       | 0.0 | 0.0     | 7   | 2.080 | 2   | 0.12   |       |        |        |
| Native    | Wz   | Ca        | %   | 0.8           | 1.1 | 3 | 0.0    | 0.3 | 3 | 0.182   | 66 | 0.182   | 66 | 0.42            | 0.5 | 7 | 1.3    | 1.1 | 7       | 1.3    | 0.0     | 7 | 1.3   | 0.0              | 7     | 2.775 | 139.9  | 0.99   | 5.9 | 1.4   | 7       | 4.2 | 1.2     | 7              | 3.5   | 1.0 | 7      | 70.48 | 2      | <0.01* | 0.3 | 0.4 | 7       | 1.2 | 1.4     | 7   | 0.3   | 0.8 | 7      | 17.79 | 2      | <0.01* |
| Native    | Wz   | Te        | %   | 0.0           | 0.0 | 3 | 0.0    | 0.0 | 3 | 1.261   | 34 | 1.261   | 34 | 0.89            | 0.0 | 7 | 0.0    | 0.0 | 7       | 0.0    | 0.0     | 7 | 0.0   | 0.0              | 7     | 1.398 | 71     | 0.08   | 1.2 | 2.3   | 7       | 0.4 | 0.7     | 7              | 0.5   | 1.1 | 7      | 11.18 | 2      | <0.01* | 0.0 | 0.0 | 7       | 0.0 | 0.0     | 7   | 0.0   | 0.4 | 7      | 1.337 | 2      | 0.26   |
| Treated   | Rs   | H         | GPa | 0.2           | 0.0 | 3 | 0.8    | 1.3 | 3 | 6.200   | 68 | 6.200   | 68 | <0.01*          | 0.3 | 6 | 0.0    | 0.2 | 6       | 0.0    | 0.0     | 7 | 0.0   | 0.0              | 7     | 7.142 | 99.10  | <0.01* | 0.9 | 0.3   | 7       | 0.3 | 0.1     | 7              | 0.6   | 0.2 | 7      | 73.90 | 2      | <0.01* | 0.4 | 0.2 | 6       | 0.4 | 0.1     | 7   | 0.4   | 0.1 | 7      | 0.789 | 2      | 0.45   |
| Treated   | Rs   | E         | GPa | 2.0           | 0.1 | 3 | 0.2    | 0.0 | 3 | 5.584   | 68 | 5.584   | 68 | <0.01*          | 2.4 | 6 | 0.3    | 2.3 | 6       | 0.1    | 0.1     | 7 | 0.1   | 0.1              | 7     | 1.465 | 98.02  | 0.07   | 7.1 | 3.4   | 7       | 2.4 | 0.8     | 7              | 5.0   | 1.6 | 7      | 76.34 | 2      | <0.01* | 3.5 | 1.2 | 6       | 3.3 | 0.9     | 7   | 3.1   | 1.0 | 7      | 2.533 | 2      | 0.08   |
| Treated   | Rs   | Fe        | %   | 0.0           | 0.0 | 3 | 1.8    | 0.1 | 3 | 0.019   | 68 | 0.019   | 68 | 0.49            | 0.0 | 6 | 0.0    | 0.0 | 6       | 0.0    | 0.1     | 7 | 0.0   | 0.1              | 7     | 0.033 | 126.1  | 0.48   | 2.3 | 2.9   | 7       | 0.1 | 0.2     | 7              | 0.0   | 0.1 | 7      | 40.94 | 2      | <0.01* | 0.0 | 0.2 | 6       | 0.0 | 0.2     | 7   | 0.0   | 0.0 | 7      | 1.605 | 2      | 0.20   |
| Treated   | Rs   | Ca        | %   | 0.0           | 0.0 | 3 | 0.0    | 0.0 | 3 | 0.029   | 68 | 0.029   | 68 | 0.48            | 0.0 | 6 | 0.0    | 0.0 | 6       | 0.0    | 0.0     | 7 | 0.0   | 0.0              | 7     | 0.0   | 0.0    | 7      | 0.0 | 0.0   | 7       | 0.0 | 0.0     | 7              | 2.621 | 2   | 0.07   | 0.0   | 0.0    | 6      | 0.0 | 0.0 | 6       | 0.0 | 0.0     | 6   | 2.094 | 2   | 0.12   |       |        |        |
| Treated   | Rs   | Te        | %   | 0.0           | 0.0 | 3 | 0.0    | 0.1 | 3 | 1.094   | 35 | 1.094   | 35 | 0.85            | 0.0 | 6 | 0.0    | 0.0 | 6       | 0.0    | 0.0     | 7 | 0.0   | 0.0              | 7     | -1    | 68     | 0.16   | 0.0 | 0.0   | 7       | 0.0 | 0.0     | 7              | 0.0   | 0.0 | 7      | 0.143 | 1      | 0.86   | 0.0 | 0.0 | 6       | 0.0 | 0.0     | 6   | 0.0   | 0.0 | 6      | 0.36  | 2      | 0.96   |
| Treated   | Mz   | H         | GPa | 0.7           | 0.3 | 4 | 0.0    | 0.0 | 4 | 3.159   | 77 | 3.159   | 77 | 0.00            | 0.7 | 4 | 0.3    | 0.5 | 4       | 0.2    | 0.8     | 7 | 0.2   | 0.8              | 7     | 3.846 | 140.1  | <0.01* | 2.3 | 0.4   | 8       | 1.2 | 0.3     | 8              | 2.0   | 0.2 | 9      | 226.3 | 2      | <0.01* | 1.2 | 0.1 | 9       | 1.2 | 0.2     | 8   | 0.5   | 0.1 | 8      | 333.1 | 2      | <0.01* |
| Treated   | Mz   | E         | GPa | 6.1           | 2.9 | 4 | 0.5    | 0.2 | 4 | 3.023   | 79 | 3.023   | 79 | 0.00            | 5.6 | 8 | 2.8    | 4.8 | 8       | 1.8    | 0.8     | 7 | 2.284 | 150.1            | 0.01  | 19.   | 3.8    | 8      | 9.2 | 2.4   | 8       | 7.2 | 1.0     | 9              | 534.0 | 2   | <0.01* | 9.2   | 1.1    | 9      | 7.3 | 0.9 | 8       | 4.2 | 0.7     | 8   | 590.2 | 2   | <0.01* |       |        |        |
| Treated   | Mz   | Fe        | %   | 0.0           | 0.0 | 4 | 4.4    | 2.1 | 4 | 1.164   | 43 | 1.164   | 43 | 0.87            | 0.0 | 8 | 0.0    | 0.0 | 8       | 0.0    | 0.0     | 7 | 0.0   | 0.0              | 7     | 1.408 | 88     | 0.08   | 12. | 5.7   | 8       | 2.9 | 3.3     | 8              | 0.2   | 0.2 | 9      | 386.7 | 2      | <0.01* | 0.0 | 0.0 | 9       | 0.0 | 0.0     | 8   | 0.0   | 0.0 | 8      | 2.003 | 2      | 0.13   |
| Treated   | Mz   | Ca        | %   | 0.0           | 0.0 | 4 | 0.0    | 0.1 | 4 | 1.054   | 44 | 1.054   | 44 | 0.85            | 0.0 | 8 | 0.0    | 0.0 | 8       | 0.0    | 0.0     | 8 | 0.0   | 0.0              | 8     | 1.040 | 168.6  | 0.14   | 0.0 | 0.3   | 8       | 0.1 | 0.4     | 8              | 0.0   | 0.2 | 9      | 1.876 | 2      | 0.15   | 0.0 | 0.1 | 9       | 0.0 | 0.1     | 8   | 0.0   | 0.0 | 8      | 0.442 | 2      | 0.64   |
| Treated   | Mz   | Te        | %   | 0.0           | 0.0 | 4 | 0.0    | 0.0 | 4 | -1      | 44 | -1      | 44 | 0.16            | 0.0 | 8 | 0.0    | 0.1 | 8       | 0.0    | 0.1     | 7 | 0.0   | 0.1              | 7     | 0.947 | 107.8  | 0.90   | 0.0 | 0.0   | 8       | 0.0 | 0.0     | 8              | 0.0   | 0.0 | 9      | 1.259 | 2      | 0.28   | 0.0 | 0.0 | 9       | 0.0 | 0.0     | 8   | 0.502 | 2   | 0.60   |       |        |        |
| Treated   | Wz   | H         | GPa | 1.4           | 0.1 | 3 | 0.0    | 0.2 | 3 | 23.16   | 57 | 23.16   | 57 | <0.01*          | 1.4 | 7 | 0.1    | 0.9 | 7       | 0.9    | 0.7     | 7 | 0.9   | 0.7              | 28.73 | 127.3 | <0.01* | 3.8    | 0.3 | 7     | 1.4     | 0.1 | 7       | 1.6            | 0.2   | 7   | 2027.  | 2     | <0.01* | 1.2    | 0.1 | 7   | 1.2     | 0.1 | 7       | 0.6 | 0.0   | 6   | 589.4  | 2     | <0.01* |        |
| Treated   | Wz   | E         | GPa | 12.76         | 0.9 | 3 | 0.9    | 0.0 | 3 | 21.63   | 59 | 21.63   | 59 | <0.01*          | 12. | 7 | 1.1    | 8.9 | 7       | 2.2    | 2.5     | 7 | 2.5   | 2.5              | 19.57 | 133.7 | <0.01* | 29.    | 2.4 | 7     | 10.     | 0.7 | 7       | 9.9            | 0.9   | 7   | 3501.  | 2     | <0.01* | 9.6    | 0.5 | 7   | 8.8     | 1.1 | 7       | 5.1 | 0.5   | 6   | 629.7  | 2     | <0.01* |        |
| Treated   | Wz   | Fe        | %   | 0.0           | 0.0 | 3 | 8.7    | 0.6 | 3 | 1.717   | 34 | 1.717   |    |                 |     |   |        |     |         |        |         |   |       |                  |       |       |        |        |     |       |         |     |         |                |       |     |        |       |        |        |     |     |         |     |         |     |       |     |        |       |        |        |

|          |     |    |   |     |     |   |     |     |   |       |       |      |     |     |   |     |     |   |   |   |     |     |   |     |     |   |     |     |   |       |    |      |     |     |   |     |     |   |     |     |   |       |     |      |
|----------|-----|----|---|-----|-----|---|-----|-----|---|-------|-------|------|-----|-----|---|-----|-----|---|---|---|-----|-----|---|-----|-----|---|-----|-----|---|-------|----|------|-----|-----|---|-----|-----|---|-----|-----|---|-------|-----|------|
| Treat ed | W z | Ca | % | 0.0 | 0.1 | 3 | 0.0 | 0.2 | 3 | 0.047 | 65.84 | 0.51 | 0.0 | 0.0 | 7 | 0.0 | 7   | - | - | - | 0.0 | 0.3 | 7 | 0.4 | 0.6 | 7 | 0.0 | 0.3 | 7 | 14.33 | 2  | <0.0 | 0.0 | 0.1 | 7 | 0.0 | 0.2 | 7 | 0.0 | 0.1 | 6 | 3.096 | 2   | 0.04 |
|          |     |    |   | 7   | 9   | 5 | 6   | 0   | 5 | 975   | 88    | 91   | 0   | 0   | 0 | 0   | 5   | - | - | - | 9   | 6   | 4 | 5   | 9   | 0 | 6   | 1   | 1 | 09    | 2  | 01*  | 8   | 3   | 0 | 17  | 0   | 1 | 2   | 2   | 9 | 2     | 73* |      |
| Treat ed | W z | Te | % | 0.0 | 0.0 | 3 | 0.0 | 0.0 | 3 | 1.628 | 34    | 0.94 | 0.0 | 0.0 | 7 | 0.0 | 0.0 | 7 | - | - | 0.0 | 0.0 | 7 | 0.0 | 0.0 | 7 | 0.0 | 0.0 | 1 | 1.427 | 2  | 0.24 | 0.0 | 0.0 | 7 | 0.0 | 0.0 | 7 | 0.0 | 0.0 | 6 | 1.830 | 2   | 0.16 |
|          |     |    |   | 0   | 0   | 5 | 1   | 5   | 5 | 022   |       | 36   | 0   | 0   | 0 | 0   | 5   | - | - | - | 0   | 2   | 4 | 0   | 2   | 0 | 2   | 1   | 1 | 1     | 23 | 0    | 0   | 0   | 0 | 0   | 1   | 1 | 3   | 9   | 1 | 3     |     |      |

**Supplementary Table 11.** For each tooth type and tooth part sorted to condition (native or treated) and radular tooth row (Tr). Mean (M) and standard deviation (Sd) for the following parameters (P) are shown: proportions, given in %, of Te ('trace elements' = sum of Na, Mg, Si, P, S, Cl, K), Ca, Fe, and all elements (Ae), Young's modulus (E) and hardness (H), given in GPa. Mz, mineralization zone; Rs, radular sac; Rz, radular zone; U, unit of measure; Wz, working zone.

| Condition | Rz | Tr | P  | U   | Central tooth |      |      |      | Lateral tooth I |      |      |      | Lateral tooth II |      |        |      |       |      | Marginal tooth |      |        |      |      |      |
|-----------|----|----|----|-----|---------------|------|------|------|-----------------|------|------|------|------------------|------|--------|------|-------|------|----------------|------|--------|------|------|------|
|           |    |    |    |     | Stylus        |      | Cusp |      | Stylus          |      | Cusp |      | Basis            |      | Stylus |      | Cusp  |      | Basis          |      | Stylus |      | Cusp |      |
|           |    |    |    |     | M             | Sd   | M    | Sd   | M               | Sd   | M    | Sd   | M                | Sd   | M      | Sd   | M     | Sd   | M              | Sd   | M      | Sd   | M    | Sd   |
| Native    | Rs | 1  | Ae | %   | 0.00          | 0.00 | 0.00 | 0.00 | 0.00            | 0.00 | 0.00 | 0.00 | 0.00             | 1.47 | 0.21   | 0.35 | 0.00  | 0.00 | 0.06           | 0.16 | 0.00   | 0.00 | 0.38 | 0.59 |
| Native    | Rs | 1  | Ca | %   | 0.00          | 0.00 | 0.00 | 0.00 | 0.00            | 0.00 | 0.00 | 0.00 | 0.00             | 0.00 | 0.00   | 0.00 | 0.00  | 0.00 | 0.00           | 0.00 | 0.00   | 0.00 | 0.00 | 0.00 |
| Native    | Rs | 1  | E  | GPa | 2.50          | 0.13 | 2.50 | 0.13 | 2.66            | 0.20 | 2.77 | 0.28 | 2.43             | 0.12 | 2.10   | 0.12 | 2.31  | 0.13 | 2.36           | 0.29 | 2.55   | 0.48 | 2.62 | 0.50 |
| Native    | Rs | 1  | Fe | %   | 0.00          | 0.00 | 0.00 | 0.00 | 0.00            | 0.00 | 0.00 | 0.00 | 0.00             | 0.00 | 0.00   | 0.00 | 0.00  | 0.00 | 0.00           | 0.00 | 0.00   | 0.38 | 0.59 |      |
| Native    | Rs | 1  | H  | GPa | 0.30          | 0.02 | 0.30 | 0.02 | 0.33            | 0.03 | 0.33 | 0.03 | 0.30             | 0.02 | 0.27   | 0.02 | 0.30  | 0.02 | 0.31           | 0.04 | 0.31   | 0.06 | 0.34 | 0.07 |
| Native    | Rs | 1  | Te | %   | 0.00          | 0.00 | 0.00 | 0.00 | 0.00            | 0.00 | 0.00 | 0.00 | 0.00             | 0.00 | 0.21   | 0.35 | 0.00  | 0.00 | 0.06           | 0.16 | 0.00   | 0.00 | 0.00 | 0.00 |
| Native    | Rs | 2  | Ae | %   | 0.12          | 0.21 | 0.00 | 0.00 | 0.00            | 0.00 | 0.00 | 0.00 | 0.00             | 0.00 | 0.01   | 0.01 | 0.02  | 0.06 | 0.11           | 0.26 | 0.00   | 0.00 | 0.00 | 0.00 |
| Native    | Rs | 2  | Ca | %   | 0.12          | 0.21 | 0.00 | 0.00 | 0.00            | 0.00 | 0.00 | 0.00 | 0.00             | 0.00 | 0.00   | 0.00 | 0.00  | 0.00 | 0.00           | 0.00 | 0.00   | 0.00 | 0.00 | 0.00 |
| Native    | Rs | 2  | E  | GPa | 2.59          | 0.17 | 2.61 | 0.06 | 2.69            | 0.23 | 2.89 | 0.43 | 2.54             | 0.13 | 2.23   | 0.13 | 3.37  | 0.19 | 2.52           | 0.17 | 2.72   | 0.19 | 2.50 | 0.37 |
| Native    | Rs | 2  | Fe | %   | 0.00          | 0.00 | 0.00 | 0.00 | 0.00            | 0.00 | 0.00 | 0.00 | 0.00             | 0.00 | 0.01   | 0.01 | 0.00  | 0.00 | 0.00           | 0.00 | 0.00   | 0.00 | 0.00 | 0.00 |
| Native    | Rs | 2  | H  | GPa | 0.31          | 0.02 | 0.31 | 0.01 | 0.33            | 0.03 | 0.35 | 0.05 | 0.31             | 0.02 | 0.29   | 0.02 | 0.44  | 0.03 | 0.33           | 0.03 | 0.33   | 0.02 | 0.32 | 0.05 |
| Native    | Rs | 2  | Te | %   | 0.00          | 0.00 | 0.00 | 0.00 | 0.00            | 0.00 | 0.00 | 0.00 | 0.00             | 0.00 | 0.00   | 0.00 | 0.02  | 0.06 | 0.11           | 0.26 | 0.00   | 0.00 | 0.00 | 0.00 |
| Native    | Rs | 3  | Ae | %   | 0.00          | 0.00 | 0.03 | 0.06 | 0.00            | 0.00 | 0.00 | 0.00 | 0.00             | 0.00 | 0.19   | 0.29 | 0.77  | 0.98 | 0.17           | 0.37 | 0.28   | 0.44 | 0.00 | 0.00 |
| Native    | Rs | 3  | Ca | %   | 0.00          | 0.00 | 0.03 | 0.06 | 0.00            | 0.00 | 0.00 | 0.00 | 0.00             | 0.00 | 0.00   | 0.00 | 0.67  | 1.03 | 0.00           | 0.00 | 0.00   | 0.00 | 0.00 | 0.00 |
| Native    | Rs | 3  | E  | GPa | 2.65          | 0.22 | 2.59 | 0.17 | 2.62            | 0.15 | 2.73 | 0.22 | 3.58             | 0.19 | 2.25   | 0.13 | 4.43  | 0.25 | 2.59           | 0.28 | 2.85   | 0.24 | 2.81 | 0.82 |
| Native    | Rs | 3  | Fe | %   | 0.00          | 0.00 | 0.00 | 0.00 | 0.00            | 0.00 | 0.00 | 0.00 | 0.00             | 0.00 | 0.00   | 0.00 | 0.00  | 0.00 | 0.00           | 0.28 | 0.44   | 0.00 | 0.00 | 0.00 |
| Native    | Rs | 3  | H  | GPa | 0.32          | 0.03 | 0.31 | 0.02 | 0.32            | 0.02 | 0.33 | 0.03 | 0.44             | 0.03 | 0.29   | 0.02 | 0.58  | 0.04 | 0.34           | 0.05 | 0.34   | 0.03 | 0.37 | 0.11 |
| Native    | Rs | 3  | Te | %   | 0.00          | 0.00 | 0.00 | 0.00 | 0.00            | 0.00 | 0.00 | 0.00 | 0.00             | 0.00 | 0.19   | 0.29 | 0.10  | 0.25 | 0.17           | 0.37 | 0.00   | 0.00 | 0.00 | 0.00 |
| Native    | Rs | 4  | Ae | %   | 0.00          | 0.00 | 0.00 | 0.00 | 0.00            | 0.00 | 0.50 | 0.78 | 2.29             | 0.00 | 0.30   | 0.04 | 0.31  | 0.20 | 0.00           | 0.00 | 0.21   | 0.33 | 0.00 | 0.00 |
| Native    | Rs | 4  | Ca | %   | 0.00          | 0.00 | 0.00 | 0.00 | 0.00            | 0.00 | 0.50 | 0.78 | 2.29             | 1.50 | 0.30   | 0.04 | 0.23  | 0.02 | 0.00           | 0.00 | 0.21   | 0.33 | 0.00 | 0.00 |
| Native    | Rs | 4  | E  | GPa | 2.66          | 0.22 | 2.67 | 0.25 | 2.66            | 0.18 | 2.86 | 0.38 | 4.32             | 0.22 | 2.32   | 0.13 | 5.16  | 0.29 | 3.15           | 0.51 | 2.96   | 0.68 | 2.72 | 0.83 |
| Native    | Rs | 4  | Fe | %   | 0.00          | 0.00 | 0.00 | 0.00 | 0.00            | 0.00 | 0.00 | 0.00 | 0.00             | 0.00 | 0.00   | 0.00 | 0.00  | 0.00 | 0.00           | 0.00 | 0.00   | 0.00 | 0.00 | 0.00 |
| Native    | Rs | 4  | H  | GPa | 0.32          | 0.03 | 0.32 | 0.03 | 0.33            | 0.03 | 0.34 | 0.05 | 0.53             | 0.04 | 0.30   | 0.02 | 0.67  | 0.05 | 0.41           | 0.07 | 0.35   | 0.08 | 0.35 | 0.11 |
| Native    | Rs | 4  | Te | %   | 0.00          | 0.00 | 0.00 | 0.00 | 0.00            | 0.00 | 0.00 | 0.00 | 0.00             | 0.00 | 0.00   | 0.00 | 0.08  | 0.20 | 0.00           | 0.00 | 0.00   | 0.00 | 0.00 | 0.00 |
| Native    | Rs | 5  | Ae | %   | 0.17          | 0.30 | 0.00 | 0.00 | 0.00            | 0.00 | 0.13 | 0.20 | 2.25             | 1.50 | 0.24   | 0.19 | 0.38  | 0.10 | 0.21           | 0.32 | 0.28   | 0.44 | 0.04 | 0.06 |
| Native    | Rs | 5  | Ca | %   | 0.17          | 0.30 | 0.00 | 0.00 | 0.00            | 0.00 | 0.00 | 0.00 | 2.25             | 0.10 | 0.16   | 0.03 | 0.38  | 0.10 | 0.00           | 0.00 | 0.00   | 0.00 | 0.04 | 0.06 |
| Native    | Rs | 5  | E  | GPa | 2.52          | 0.13 | 2.65 | 0.25 | 2.69            | 0.21 | 2.81 | 0.30 | 4.67             | 0.23 | 2.32   | 0.13 | 6.56  | 0.37 | 3.12           | 0.61 | 2.81   | 0.82 | 2.81 | 0.78 |
| Native    | Rs | 5  | Fe | %   | 0.00          | 0.00 | 0.00 | 0.00 | 0.00            | 0.00 | 0.13 | 0.20 | 0.00             | 0.00 | 0.00   | 0.00 | 0.00  | 0.00 | 0.00           | 0.28 | 0.44   | 0.00 | 0.00 | 0.00 |
| Native    | Rs | 5  | H  | GPa | 0.30          | 0.02 | 0.32 | 0.03 | 0.33            | 0.03 | 0.34 | 0.04 | 0.58             | 0.04 | 0.30   | 0.02 | 0.85  | 0.06 | 0.41           | 0.08 | 0.34   | 0.10 | 0.36 | 0.10 |
| Native    | Rs | 5  | Te | %   | 0.00          | 0.00 | 0.00 | 0.00 | 0.00            | 0.00 | 0.00 | 0.00 | 0.00             | 0.00 | 0.08   | 0.20 | 0.00  | 0.00 | 0.21           | 0.32 | 0.00   | 0.00 | 0.00 | 0.00 |
| Native    | Rs | 6  | Ae | %   | 0.00          | 0.00 | 0.05 | 0.07 | 0.00            | 0.00 | 0.26 | 0.41 | 2.72             | 0.10 | 0.93   | 0.78 | 1.91  | 0.81 | 0.12           | 0.27 | 0.33   | 0.50 | 0.21 | 0.33 |
| Native    | Rs | 6  | Ca | %   | 0.00          | 0.00 | 0.05 | 0.07 | 0.00            | 0.00 | 0.26 | 0.41 | 2.72             | 0.67 | 0.55   | 0.41 | 1.53  | 0.25 | 0.12           | 0.27 | 0.33   | 0.50 | 0.21 | 0.33 |
| Native    | Rs | 6  | E  | GPa | 2.59          | 0.13 | 2.48 | 0.06 | 2.62            | 0.14 | 2.95 | 0.48 | 5.78             | 0.29 | 3.07   | 0.19 | 9.44  | 0.53 | 3.76           | 1.02 | 2.77   | 0.80 | 3.37 | 1.20 |
| Native    | Rs | 6  | Fe | %   | 0.00          | 0.00 | 0.00 | 0.00 | 0.00            | 0.00 | 0.00 | 0.00 | 0.00             | 0.00 | 0.00   | 0.00 | 0.38  | 0.59 | 0.00           | 0.00 | 0.00   | 0.00 | 0.00 | 0.00 |
| Native    | Rs | 6  | H  | GPa | 0.31          | 0.02 | 0.30 | 0.01 | 0.32            | 0.02 | 0.35 | 0.06 | 0.71             | 0.05 | 0.39   | 0.02 | 1.23  | 0.08 | 0.48           | 0.14 | 0.33   | 0.10 | 0.44 | 0.16 |
| Native    | Rs | 6  | Te | %   | 0.00          | 0.00 | 0.00 | 0.00 | 0.00            | 0.00 | 0.00 | 0.00 | 0.00             | 0.00 | 0.38   | 0.85 | 0.00  | 0.00 | 0.00           | 0.00 | 0.00   | 0.00 | 0.00 | 0.00 |
| Native    | Rs | 7  | Ae | %   | 0.00          | 0.00 | 0.21 | 0.37 | 0.00            | 0.00 | 0.00 | 0.00 | 3.19             | 0.67 | 1.32   | 1.19 | 1.75  | 0.34 | 0.15           | 0.12 | 0.00   | 0.00 | 0.09 | 0.14 |
| Native    | Rs | 7  | Ca | %   | 0.00          | 0.00 | 0.21 | 0.37 | 0.00            | 0.00 | 0.00 | 0.00 | 3.06             | 0.64 | 0.43   | 0.23 | 1.24  | 0.72 | 0.15           | 0.12 | 0.00   | 0.00 | 0.09 | 0.14 |
| Native    | Rs | 7  | E  | GPa | 2.61          | 0.18 | 2.65 | 0.18 | 2.67            | 0.17 | 2.76 | 0.23 | 6.97             | 0.35 | 3.39   | 0.19 | 10.94 | 0.62 | 3.33           | 1.30 | 3.40   | 1.16 | 3.75 | 1.13 |
| Native    | Rs | 7  | Fe | %   | 0.00          | 0.00 | 0.00 | 0.00 | 0.00            | 0.00 | 0.00 | 0.00 | 0.14             | 0.13 | 0.15   | 0.05 | 0.52  | 0.38 | 0.00           | 0.00 | 0.00   | 0.00 | 0.00 | 0.00 |
| Native    | Rs | 7  | H  | GPa | 0.31          | 0.02 | 0.32 | 0.02 | 0.33            | 0.03 | 0.33 | 0.03 | 0.86             | 0.06 | 0.44   | 0.03 | 1.42  | 0.10 | 0.43           | 0.17 | 0.41   | 0.14 | 0.49 | 0.15 |



|        |    |    |    |     |      |      |      |      |      |      |      |      |       |      |       |      |       |      |      |      |       |      |       |      |
|--------|----|----|----|-----|------|------|------|------|------|------|------|------|-------|------|-------|------|-------|------|------|------|-------|------|-------|------|
| Native | Rs | 7  | Te | %   | 0.00 | 0.00 | 0.00 | 0.00 | 0.00 | 0.00 | 0.00 | 0.00 | 0.00  | 0.00 | 0.74  | 1.15 | 0.00  | 0.00 | 0.00 | 0.00 | 0.00  | 0.00 | 0.00  | 0.00 |
| Native | Rs | 8  | Ae | %   | 0.00 | 0.00 | 0.36 | 0.35 | 0.00 | 0.00 | 0.00 | 0.00 | 2.33  | 0.76 | 1.10  | 0.92 | 4.24  | 0.96 | 0.58 | 0.89 | 0.00  | 0.00 | 0.54  | 0.83 |
| Native | Rs | 8  | Ca | %   | 0.00 | 0.00 | 0.23 | 0.40 | 0.00 | 0.00 | 0.00 | 0.00 | 2.12  | 0.29 | 0.43  | 0.16 | 1.97  | 0.67 | 0.58 | 0.89 | 0.00  | 0.00 | 0.54  | 0.83 |
| Native | Rs | 8  | E  | GPa | 2.72 | 0.25 | 2.65 | 0.22 | 2.69 | 0.19 | 2.91 | 0.41 | 8.02  | 0.40 | 4.20  | 0.24 | 11.81 | 0.67 | 3.72 | 1.79 | 3.64  | 0.96 | 4.78  | 1.33 |
| Native | Rs | 8  | Fe | %   | 0.00 | 0.00 | 0.13 | 0.23 | 0.00 | 0.00 | 0.00 | 0.00 | 0.21  | 0.33 | 0.26  | 0.08 | 2.27  | 0.41 | 0.00 | 0.00 | 0.00  | 0.00 | 0.00  | 0.00 |
| Native | Rs | 8  | H  | GPa | 0.33 | 0.03 | 0.32 | 0.03 | 0.33 | 0.03 | 0.35 | 0.05 | 0.99  | 0.07 | 0.55  | 0.04 | 1.53  | 0.11 | 0.48 | 0.23 | 0.44  | 0.12 | 0.62  | 0.17 |
| Native | Rs | 8  | Te | %   | 0.00 | 0.00 | 0.00 | 0.00 | 0.00 | 0.00 | 0.00 | 0.00 | 0.00  | 0.00 | 0.42  | 1.02 | 0.00  | 0.00 | 0.00 | 0.00 | 0.00  | 0.00 | 0.00  | 0.00 |
| Native | Rs | 9  | Ae | %   | 0.20 | 0.35 | 0.00 | 0.00 | 0.00 | 0.00 | 0.00 | 0.00 | 2.13  | 0.43 | 0.51  | 0.07 | 6.36  | 0.73 | 0.00 | 0.00 | 0.21  | 0.33 | 0.89  | 0.91 |
| Native | Rs | 9  | Ca | %   | 0.00 | 0.00 | 0.00 | 0.00 | 0.00 | 0.00 | 0.00 | 0.00 | 2.01  | 0.19 | 0.35  | 0.10 | 1.61  | 0.46 | 0.00 | 0.00 | 0.21  | 0.33 | 0.89  | 0.91 |
| Native | Rs | 9  | E  | GPa | 2.73 | 0.25 | 2.66 | 0.22 | 2.74 | 0.25 | 2.84 | 0.31 | 9.14  | 0.46 | 4.45  | 0.25 | 13.64 | 0.77 | 3.99 | 1.55 | 3.72  | 0.90 | 5.41  | 0.97 |
| Native | Rs | 9  | Fe | %   | 0.20 | 0.35 | 0.00 | 0.00 | 0.00 | 0.00 | 0.00 | 0.00 | 0.12  | 0.10 | 0.16  | 0.04 | 4.75  | 0.45 | 0.00 | 0.00 | 0.00  | 0.00 | 0.00  | 0.00 |
| Native | Rs | 9  | H  | GPa | 0.33 | 0.03 | 0.32 | 0.03 | 0.34 | 0.03 | 0.34 | 0.04 | 1.13  | 0.08 | 0.58  | 0.04 | 1.77  | 0.12 | 0.52 | 0.20 | 0.45  | 0.11 | 0.70  | 0.13 |
| Native | Rs | 9  | Te | %   | 0.00 | 0.00 | 0.00 | 0.00 | 0.00 | 0.00 | 0.00 | 0.00 | 0.00  | 0.00 | 0.00  | 0.00 | 0.00  | 0.00 | 0.00 | 0.00 | 0.00  | 0.00 | 0.00  | 0.00 |
| Native | Rs | 10 | Ae | %   | 0.27 | 0.47 | 0.00 | 0.00 | 0.00 | 0.00 | 0.00 | 0.00 | 2.46  | 0.11 | 0.76  | 0.39 | 6.46  | 2.25 | 0.56 | 0.87 | 0.65  | 1.01 | 0.50  | 0.68 |
| Native | Rs | 10 | Ca | %   | 0.27 | 0.47 | 0.00 | 0.00 | 0.00 | 0.00 | 0.00 | 0.00 | 2.36  | 0.41 | 0.58  | 0.39 | 1.42  | 1.02 | 0.56 | 0.87 | 0.65  | 1.01 | 0.50  | 0.68 |
| Native | Rs | 10 | E  | GPa | 2.60 | 0.14 | 2.53 | 0.14 | 2.65 | 0.14 | 2.85 | 0.32 | 10.26 | 0.51 | 5.51  | 0.31 | 14.34 | 0.88 | 4.11 | 1.47 | 4.78  | 0.91 | 6.46  | 0.81 |
| Native | Rs | 10 | Fe | %   | 0.00 | 0.00 | 0.00 | 0.00 | 0.00 | 0.00 | 0.00 | 0.00 | 0.09  | 0.15 | 0.18  | 0.06 | 5.03  | 1.25 | 0.00 | 0.00 | 0.00  | 0.00 | 0.00  | 0.00 |
| Native | Rs | 10 | H  | GPa | 0.31 | 0.02 | 0.30 | 0.02 | 0.33 | 0.02 | 0.34 | 0.04 | 1.27  | 0.09 | 0.72  | 0.05 | 1.83  | 0.13 | 0.53 | 0.19 | 0.57  | 0.11 | 0.85  | 0.09 |
| Native | Rs | 10 | Te | %   | 0.00 | 0.00 | 0.00 | 0.00 | 0.00 | 0.00 | 0.00 | 0.00 | 0.00  | 0.00 | 0.00  | 0.00 | 0.00  | 0.00 | 0.00 | 0.00 | 0.00  | 0.00 | 0.00  | 0.00 |
| Native | Rs | 11 | Ae | %   | 0.60 | 0.84 | 0.40 | 0.69 | 0.29 | 0.42 | 0.10 | 0.15 | 2.35  | 0.33 | 1.80  | 1.30 | 8.13  | 1.83 | 0.08 | 0.12 | 0.43  | 0.61 | 0.03  | 0.06 |
| Native | Rs | 11 | Ca | %   | 0.60 | 0.84 | 0.40 | 0.69 | 0.00 | 0.00 | 0.00 | 0.00 | 1.98  | 0.19 | 1.16  | 1.31 | 2.25  | 1.12 | 0.00 | 0.00 | 0.39  | 0.60 | 0.00  | 0.00 |
| Native | Rs | 11 | E  | GPa | 2.72 | 0.04 | 2.61 | 0.13 | 2.71 | 0.19 | 2.79 | 0.29 | 10.95 | 0.55 | 6.34  | 0.36 | 15.76 | 0.89 | 4.37 | 1.36 | 5.41  | 0.47 | 7.16  | 0.82 |
| Native | Rs | 11 | Fe | %   | 0.00 | 0.00 | 0.00 | 0.00 | 0.25 | 0.39 | 0.00 | 0.00 | 0.32  | 0.25 | 0.58  | 0.08 | 5.83  | 1.25 | 0.00 | 0.00 | 0.00  | 0.00 | 0.00  | 0.00 |
| Native | Rs | 11 | H  | GPa | 0.33 | 0.00 | 0.31 | 0.02 | 0.33 | 0.03 | 0.34 | 0.04 | 1.35  | 0.09 | 0.82  | 0.06 | 2.05  | 0.14 | 0.57 | 0.18 | 0.65  | 0.06 | 0.93  | 0.11 |
| Native | Rs | 11 | Te | %   | 0.00 | 0.00 | 0.00 | 0.00 | 0.04 | 0.07 | 0.10 | 0.15 | 0.05  | 0.08 | 0.06  | 0.10 | 0.04  | 0.07 | 0.08 | 0.12 | 0.04  | 0.06 | 0.03  | 0.06 |
| Native | Rs | 12 | Ae | %   | 0.36 | 0.53 | 0.00 | 0.00 | 0.01 | 0.04 | 0.19 | 0.24 | 2.44  | 0.13 | 4.47  | 1.65 | 11.07 | 2.12 | 0.01 | 0.03 | 0.65  | 0.88 | 0.70  | 0.92 |
| Native | Rs | 12 | Ca | %   | 0.32 | 0.56 | 0.00 | 0.00 | 0.00 | 0.00 | 0.00 | 0.00 | 2.34  | 0.39 | 3.77  | 1.29 | 3.92  | 1.11 | 0.00 | 0.00 | 0.65  | 0.88 | 0.60  | 0.93 |
| Native | Rs | 12 | E  | GPa | 2.72 | 0.19 | 2.64 | 0.18 | 2.72 | 0.20 | 2.94 | 0.43 | 11.38 | 0.57 | 6.58  | 0.37 | 16.10 | 0.91 | 4.74 | 1.12 | 6.54  | 0.50 | 8.21  | 0.83 |
| Native | Rs | 12 | Fe | %   | 0.00 | 0.00 | 0.00 | 0.00 | 0.00 | 0.00 | 0.13 | 0.20 | 0.10  | 0.16 | 0.54  | 0.17 | 7.04  | 1.58 | 0.00 | 0.00 | 0.00  | 0.00 | 0.00  | 0.00 |
| Native | Rs | 12 | H  | GPa | 0.33 | 0.02 | 0.32 | 0.02 | 0.34 | 0.03 | 0.35 | 0.05 | 1.41  | 0.10 | 0.86  | 0.06 | 2.09  | 0.14 | 0.62 | 0.15 | 0.78  | 0.06 | 1.07  | 0.12 |
| Native | Rs | 12 | Te | %   | 0.03 | 0.06 | 0.00 | 0.00 | 0.01 | 0.04 | 0.06 | 0.10 | 0.00  | 0.00 | 0.16  | 0.31 | 0.12  | 0.23 | 0.01 | 0.03 | 0.01  | 0.02 | 0.10  | 0.12 |
| Native | Mz | 13 | Ae | %   | 0.66 | 1.15 | 0.16 | 0.28 | 0.00 | 0.00 | 0.01 | 0.02 | 2.34  | 0.37 | 4.03  | 1.50 | 15.27 | 2.90 | 0.02 | 0.02 | 0.83  | 1.28 | 1.34  | 0.91 |
| Native | Mz | 13 | Ca | %   | 0.60 | 1.03 | 0.16 | 0.28 | 0.00 | 0.00 | 0.00 | 0.00 | 2.25  | 0.12 | 3.82  | 1.40 | 6.29  | 2.43 | 0.00 | 0.00 | 0.80  | 1.24 | 1.28  | 0.99 |
| Native | Mz | 13 | E  | GPa | 2.68 | 0.22 | 2.69 | 0.23 | 2.62 | 0.13 | 2.80 | 0.24 | 11.60 | 0.58 | 7.65  | 0.43 | 17.88 | 1.01 | 5.04 | 0.96 | 7.53  | 0.52 | 9.41  | 0.85 |
| Native | Mz | 13 | Fe | %   | 0.07 | 0.12 | 0.00 | 0.00 | 0.00 | 0.00 | 0.00 | 0.00 | 0.03  | 0.05 | 0.14  | 0.04 | 8.72  | 1.44 | 0.00 | 0.00 | 0.00  | 0.00 | 0.00  | 0.00 |
| Native | Mz | 13 | H  | GPa | 0.32 | 0.03 | 0.32 | 0.03 | 0.32 | 0.02 | 0.34 | 0.03 | 1.43  | 0.10 | 0.99  | 0.07 | 2.32  | 0.16 | 0.65 | 0.13 | 0.90  | 0.06 | 1.22  | 0.12 |
| Native | Mz | 13 | Te | %   | 0.00 | 0.00 | 0.00 | 0.00 | 0.00 | 0.00 | 0.01 | 0.02 | 0.06  | 0.10 | 0.07  | 0.17 | 0.26  | 0.60 | 0.02 | 0.02 | 0.03  | 0.06 | 0.06  | 0.14 |
| Native | Mz | 14 | Ae | %   | 0.30 | 0.52 | 1.57 | 1.39 | 0.08 | 0.08 | 0.13 | 0.11 | 3.71  | 0.22 | 4.36  | 0.75 | 15.24 | 3.15 | 0.10 | 0.08 | 0.06  | 0.05 | 0.04  | 0.06 |
| Native | Mz | 14 | Ca | %   | 0.00 | 0.00 | 1.57 | 1.39 | 0.00 | 0.00 | 0.00 | 0.00 | 3.31  | 1.01 | 3.59  | 0.90 | 6.20  | 2.93 | 0.00 | 0.00 | 0.00  | 0.00 | 0.00  | 0.00 |
| Native | Mz | 14 | E  | GPa | 2.59 | 0.13 | 2.75 | 0.22 | 2.66 | 0.14 | 2.71 | 0.19 | 13.62 | 0.68 | 9.19  | 0.58 | 19.24 | 1.09 | 5.02 | 0.99 | 8.64  | 0.50 | 10.39 | 0.86 |
| Native | Mz | 14 | Fe | %   | 0.30 | 0.52 | 0.00 | 0.00 | 0.00 | 0.00 | 0.00 | 0.00 | 0.04  | 0.07 | 0.58  | 0.14 | 8.99  | 0.87 | 0.00 | 0.00 | 0.00  | 0.00 | 0.00  | 0.00 |
| Native | Mz | 14 | H  | GPa | 0.31 | 0.02 | 0.33 | 0.03 | 0.33 | 0.02 | 0.33 | 0.02 | 1.68  | 0.12 | 1.17  | 0.07 | 2.50  | 0.17 | 0.65 | 0.13 | 1.04  | 0.06 | 1.35  | 0.12 |
| Native | Mz | 14 | Te | %   | 0.00 | 0.00 | 0.00 | 0.00 | 0.08 | 0.08 | 0.13 | 0.11 | 0.35  | 0.30 | 0.19  | 0.21 | 0.04  | 0.07 | 0.10 | 0.08 | 0.06  | 0.05 | 0.04  | 0.06 |
| Native | Mz | 15 | Ae | %   | 0.15 | 0.14 | 0.00 | 0.00 | 1.34 | 0.85 | 0.26 | 0.32 | 3.04  | 1.28 | 4.32  | 1.50 | 16.97 | 1.62 | 0.00 | 0.00 | 0.25  | 0.39 | 1.14  | 0.81 |
| Native | Mz | 15 | Ca | %   | 0.00 | 0.00 | 0.00 | 0.00 | 1.23 | 1.02 | 0.23 | 0.35 | 2.93  | 0.26 | 3.72  | 1.34 | 7.36  | 0.91 | 0.00 | 0.00 | 0.25  | 0.39 | 1.10  | 0.86 |
| Native | Mz | 15 | E  | GPa | 2.60 | 0.13 | 2.67 | 0.14 | 2.65 | 0.13 | 2.73 | 0.19 | 15.40 | 0.77 | 9.70  | 0.58 | 19.77 | 1.12 | 5.15 | 0.36 | 10.04 | 0.57 | 11.37 | 0.66 |
| Native | Mz | 15 | Fe | %   | 0.00 | 0.00 | 0.00 | 0.00 | 0.00 | 0.00 | 0.00 | 0.00 | 0.07  | 0.11 | 0.54  | 0.09 | 9.61  | 0.88 | 0.00 | 0.00 | 0.00  | 0.00 | 0.00  | 0.00 |
| Native | Mz | 15 | H  | GPa | 0.31 | 0.02 | 0.32 | 0.02 | 0.33 | 0.02 | 0.33 | 0.02 | 1.90  | 0.13 | 1.28  | 0.09 | 2.57  | 0.18 | 0.68 | 0.05 | 1.20  | 0.07 | 1.48  | 0.10 |
| Native | Mz | 15 | Te | %   | 0.15 | 0.14 | 0.00 | 0.00 | 0.12 | 0.18 | 0.04 | 0.06 | 0.03  | 0.05 | 0.06  | 0.08 | 0.00  | 0.00 | 0.00 | 0.00 | 0.00  | 0.00 | 0.03  | 0.05 |
| Native | Mz | 16 | Ae | %   | 0.18 | 0.19 | 0.61 | 0.70 | 0.36 | 0.65 | 0.26 | 0.23 | 3.40  | 0.36 | 5.15  | 1.57 | 19.33 | 3.72 | 0.79 | 0.98 | 1.17  | 0.93 | 0.30  | 0.35 |
| Native | Mz | 16 | Ca | %   | 0.00 | 0.00 | 0.00 | 0.00 | 0.28 | 0.68 | 0.00 | 0.00 | 2.83  | 0.76 | 3.86  | 1.17 | 6.15  | 2.12 | 0.66 | 1.03 | 1.06  | 0.88 | 0.21  | 0.33 |
| Native | Mz | 16 | E  | GPa | 3.53 | 0.18 | 3.52 | 0.18 | 3.49 | 0.17 | 3.59 | 0.28 | 15.49 | 0.78 | 11.18 | 0.63 | 19.87 | 1.12 | 5.49 | 0.31 | 10.53 | 0.60 | 12.01 | 0.76 |
| Native | Mz | 16 | Fe | %   | 0.00 | 0.00 | 0.40 | 0.69 | 0.00 | 0.00 | 0.00 | 0.00 | 0.44  | 0.30 | 0.84  | 0.23 | 12.59 | 2.75 | 0.00 | 0.00 | 0.00  | 0.00 | 0.00  | 0.00 |
| Native | Mz | 16 | H  | GPa | 0.42 | 0.02 | 0.42 | 0.02 | 0.43 | 0.03 | 0.43 | 0.03 | 1.91  | 0.13 | 1.45  | 0.10 | 2.58  | 0.18 | 0.71 | 0.05 | 1.26  | 0.07 | 1.56  | 0.12 |

|        |    |    |    |     |      |      |       |      |      |      |       |      |       |      |       |      |       |      |      |      |       |      |       |      |
|--------|----|----|----|-----|------|------|-------|------|------|------|-------|------|-------|------|-------|------|-------|------|------|------|-------|------|-------|------|
| Native | Mz | 16 | Te | %   | 0.18 | 0.19 | 0.21  | 0.08 | 0.08 | 0.10 | 0.26  | 0.23 | 0.13  | 0.11 | 0.45  | 0.62 | 0.59  | 0.93 | 0.13 | 0.17 | 0.11  | 0.13 | 0.09  | 0.10 |
| Native | Mz | 17 | Ae | %   | 0.46 | 0.38 | 1.14  | 0.57 | 0.31 | 0.76 | 0.07  | 0.14 | 3.13  | 0.83 | 5.26  | 1.59 | 19.77 | 1.50 | 0.05 | 0.08 | 0.27  | 0.32 | 0.26  | 0.23 |
| Native | Mz | 17 | Ca | %   | 0.00 | 0.00 | 0.95  | 0.86 | 0.31 | 0.76 | 0.00  | 0.00 | 2.78  | 0.13 | 4.61  | 1.44 | 7.86  | 2.16 | 0.00 | 0.00 | 0.15  | 0.23 | 0.00  | 0.00 |
| Native | Mz | 17 | E  | GPa | 3.42 | 0.17 | 4.66  | 0.24 | 3.49 | 0.18 | 4.74  | 0.33 | 16.11 | 0.89 | 13.56 | 0.60 | 20.94 | 1.19 | 6.08 | 0.80 | 10.99 | 0.62 | 12.34 | 0.70 |
| Native | Mz | 17 | Fe | %   | 0.00 | 0.00 | 0.00  | 0.00 | 0.00 | 0.00 | 0.03  | 0.05 | 0.35  | 0.31 | 0.56  | 0.48 | 11.52 | 0.92 | 0.00 | 0.00 | 0.00  | 0.00 | 0.00  | 0.00 |
| Native | Mz | 17 | H  | GPa | 0.41 | 0.02 | 0.56  | 0.03 | 0.43 | 0.03 | 0.57  | 0.04 | 2.00  | 0.15 | 1.77  | 0.20 | 2.72  | 0.19 | 0.79 | 0.11 | 1.32  | 0.07 | 1.60  | 0.11 |
| Native | Mz | 17 | Te | %   | 0.46 | 0.38 | 0.18  | 0.31 | 0.00 | 0.00 | 0.04  | 0.10 | 0.00  | 0.00 | 0.10  | 0.24 | 0.39  | 0.89 | 0.05 | 0.08 | 0.12  | 0.12 | 0.26  | 0.23 |
| Native | Mz | 18 | Ae | %   | 0.11 | 0.18 | 1.10  | 0.78 | 0.62 | 1.19 | 0.08  | 0.11 | 3.54  | 0.18 | 4.06  | 1.54 | 20.46 | 3.25 | 0.26 | 0.32 | 0.82  | 0.43 | 0.12  | 0.13 |
| Native | Mz | 18 | Ca | %   | 0.00 | 0.00 | 1.10  | 0.78 | 0.51 | 1.24 | 0.00  | 0.00 | 2.85  | 0.28 | 3.44  | 1.29 | 6.42  | 2.32 | 0.00 | 0.00 | 0.80  | 0.42 | 0.00  | 0.00 |
| Native | Mz | 18 | E  | GPa | 4.69 | 0.24 | 5.61  | 0.28 | 4.61 | 0.23 | 5.89  | 0.41 | 16.18 | 0.81 | 15.44 | 0.93 | 21.48 | 1.22 | 6.31 | 0.81 | 11.44 | 0.65 | 12.86 | 0.73 |
| Native | Mz | 18 | Fe | %   | 0.00 | 0.00 | 0.00  | 0.00 | 0.00 | 0.00 | 0.00  | 0.00 | 0.03  | 0.05 | 0.52  | 0.17 | 13.88 | 1.33 | 0.00 | 0.00 | 0.00  | 0.00 | 0.00  | 0.00 |
| Native | Mz | 18 | H  | GPa | 0.56 | 0.03 | 0.67  | 0.03 | 0.57 | 0.04 | 0.71  | 0.05 | 2.00  | 0.14 | 2.04  | 0.15 | 2.79  | 0.19 | 0.82 | 0.11 | 1.37  | 0.08 | 1.67  | 0.12 |
| Native | Mz | 18 | Te | %   | 0.11 | 0.18 | 0.00  | 0.00 | 0.11 | 0.13 | 0.08  | 0.11 | 0.66  | 1.18 | 0.10  | 0.14 | 0.17  | 0.27 | 0.26 | 0.32 | 0.02  | 0.04 | 0.12  | 0.13 |
| Native | Mz | 19 | Ae | %   | 0.00 | 0.00 | 0.25  | 0.17 | 0.73 | 1.14 | 0.05  | 0.09 | 3.44  | 1.09 | 7.60  | 2.08 | 18.99 | 1.90 | 0.04 | 0.08 | 0.33  | 0.80 | 0.05  | 0.11 |
| Native | Mz | 19 | Ca | %   | 0.00 | 0.00 | 0.25  | 0.17 | 0.68 | 1.06 | 0.00  | 0.00 | 3.17  | 1.17 | 6.25  | 1.30 | 7.35  | 0.96 | 0.00 | 0.00 | 0.33  | 0.80 | 0.00  | 0.00 |
| Native | Mz | 19 | E  | GPa | 5.28 | 0.27 | 6.71  | 0.34 | 5.39 | 0.27 | 7.04  | 0.49 | 17.33 | 0.81 | 16.66 | 0.94 | 22.13 | 1.36 | 6.15 | 0.37 | 11.90 | 0.67 | 13.38 | 0.76 |
| Native | Mz | 19 | Fe | %   | 0.00 | 0.00 | 0.00  | 0.00 | 0.00 | 0.00 | 0.00  | 0.00 | 0.23  | 0.35 | 0.77  | 0.73 | 11.55 | 1.22 | 0.00 | 0.00 | 0.00  | 0.00 | 0.00  | 0.00 |
| Native | Mz | 19 | H  | GPa | 0.63 | 0.03 | 0.80  | 0.04 | 0.67 | 0.05 | 0.85  | 0.06 | 2.14  | 0.15 | 2.16  | 0.15 | 2.83  | 0.20 | 0.81 | 0.06 | 1.43  | 0.08 | 1.74  | 0.12 |
| Native | Mz | 19 | Te | %   | 0.00 | 0.00 | 0.00  | 0.00 | 0.05 | 0.12 | 0.05  | 0.09 | 0.04  | 0.07 | 0.58  | 1.32 | 0.09  | 0.19 | 0.04 | 0.08 | 0.00  | 0.00 | 0.05  | 0.11 |
| Native | Mz | 20 | Ae | %   | 0.42 | 0.38 | 0.47  | 0.41 | 0.82 | 1.33 | 0.00  | 0.00 | 2.38  | 1.18 | 5.97  | 1.61 | 21.03 | 2.45 | 0.51 | 0.55 | 0.00  | 0.00 | 0.39  | 0.31 |
| Native | Mz | 20 | Ca | %   | 0.42 | 0.38 | 0.47  | 0.41 | 0.82 | 1.33 | 0.00  | 0.00 | 2.26  | 0.28 | 4.72  | 1.08 | 10.07 | 1.60 | 0.51 | 0.55 | 0.00  | 0.00 | 0.39  | 0.31 |
| Native | Mz | 20 | E  | GPa | 5.85 | 0.30 | 7.91  | 0.40 | 5.73 | 0.29 | 7.98  | 0.55 | 16.95 | 1.07 | 17.27 | 0.98 | 22.56 | 1.28 | 6.43 | 0.36 | 12.36 | 0.70 | 13.90 | 0.79 |
| Native | Mz | 20 | Fe | %   | 0.00 | 0.00 | 0.00  | 0.00 | 0.00 | 0.00 | 0.00  | 0.00 | 0.04  | 0.06 | 1.04  | 0.32 | 10.68 | 1.57 | 0.00 | 0.00 | 0.00  | 0.00 | 0.00  | 0.00 |
| Native | Mz | 20 | H  | GPa | 0.70 | 0.04 | 0.95  | 0.05 | 0.71 | 0.05 | 0.96  | 0.07 | 2.17  | 0.12 | 2.24  | 0.16 | 2.93  | 0.20 | 0.84 | 0.06 | 1.48  | 0.08 | 1.81  | 0.12 |
| Native | Mz | 20 | Te | %   | 0.00 | 0.00 | 0.00  | 0.00 | 0.00 | 0.00 | 0.00  | 0.00 | 0.08  | 0.17 | 0.21  | 0.51 | 0.28  | 0.68 | 0.00 | 0.00 | 0.00  | 0.00 | 0.00  | 0.00 |
| Native | Mz | 21 | Ae | %   | 0.14 | 0.24 | 0.26  | 0.45 | 1.11 | 1.28 | 0.00  | 0.00 | 3.09  | 0.27 | 7.63  | 1.28 | 25.22 | 2.27 | 0.02 | 0.04 | 0.33  | 0.51 | 0.00  | 0.00 |
| Native | Mz | 21 | Ca | %   | 0.14 | 0.24 | 0.26  | 0.45 | 1.11 | 1.28 | 0.00  | 0.00 | 2.11  | 0.36 | 6.30  | 1.35 | 10.39 | 1.95 | 0.00 | 0.00 | 0.33  | 0.51 | 0.00  | 0.00 |
| Native | Mz | 21 | E  | GPa | 6.28 | 0.32 | 7.80  | 0.40 | 6.40 | 0.32 | 8.19  | 0.57 | 17.03 | 0.96 | 18.74 | 1.06 | 24.05 | 1.36 | 6.66 | 0.38 | 12.82 | 0.73 | 14.42 | 0.82 |
| Native | Mz | 21 | Fe | %   | 0.00 | 0.00 | 0.00  | 0.00 | 0.00 | 0.00 | 0.00  | 0.00 | 0.19  | 0.15 | 1.21  | 0.17 | 13.72 | 1.03 | 0.00 | 0.00 | 0.00  | 0.00 | 0.00  | 0.00 |
| Native | Mz | 21 | H  | GPa | 0.75 | 0.04 | 0.94  | 0.05 | 0.79 | 0.05 | 0.98  | 0.07 | 2.21  | 0.15 | 2.43  | 0.17 | 3.12  | 0.22 | 0.87 | 0.06 | 1.54  | 0.09 | 1.87  | 0.13 |
| Native | Mz | 21 | Te | %   | 0.00 | 0.00 | 0.00  | 0.00 | 0.00 | 0.00 | 0.00  | 0.00 | 0.79  | 1.67 | 0.12  | 0.29 | 1.11  | 1.36 | 0.02 | 0.04 | 0.00  | 0.00 | 0.00  | 0.00 |
| Native | Mz | 22 | Ae | %   | 1.38 | 1.30 | 0.53  | 0.06 | 0.64 | 1.13 | 0.64  | 0.99 | 3.12  | 1.87 | 8.50  | 2.39 | 25.32 | 2.94 | 0.16 | 0.19 | 0.18  | 0.18 | 0.16  | 0.26 |
| Native | Mz | 22 | Ca | %   | 1.38 | 1.30 | 0.53  | 0.06 | 0.64 | 1.13 | 0.64  | 0.99 | 2.00  | 1.15 | 6.37  | 1.41 | 11.21 | 2.92 | 0.00 | 0.00 | 0.00  | 0.00 | 0.00  | 0.00 |
| Native | Mz | 22 | E  | GPa | 7.02 | 0.36 | 9.29  | 0.47 | 6.85 | 0.34 | 9.35  | 0.65 | 17.48 | 0.99 | 19.78 | 1.22 | 24.37 | 1.38 | 6.90 | 0.39 | 13.06 | 0.61 | 14.94 | 0.85 |
| Native | Mz | 22 | Fe | %   | 0.00 | 0.00 | 0.00  | 0.00 | 0.00 | 0.00 | 0.00  | 0.00 | 0.21  | 0.07 | 2.10  | 1.09 | 13.79 | 1.04 | 0.00 | 0.00 | 0.08  | 0.10 | 0.00  | 0.00 |
| Native | Mz | 22 | H  | GPa | 0.84 | 0.04 | 1.12  | 0.06 | 0.85 | 0.06 | 1.12  | 0.08 | 2.27  | 0.16 | 2.61  | 0.14 | 3.17  | 0.22 | 0.90 | 0.06 | 1.57  | 0.07 | 1.94  | 0.13 |
| Native | Mz | 22 | Te | %   | 0.00 | 0.00 | 0.00  | 0.00 | 0.00 | 0.00 | 0.00  | 0.00 | 0.91  | 0.97 | 0.03  | 0.07 | 0.31  | 0.61 | 0.16 | 0.19 | 0.10  | 0.16 | 0.16  | 0.26 |
| Native | Mz | 23 | Ae | %   | 0.56 | 0.44 | 0.71  | 0.53 | 0.62 | 0.40 | 0.16  | 0.18 | 2.54  | 1.29 | 9.24  | 1.89 | 24.73 | 3.24 | 1.06 | 0.58 | 0.65  | 0.12 | 0.66  | 0.28 |
| Native | Mz | 23 | Ca | %   | 0.40 | 0.41 | 0.46  | 0.45 | 0.42 | 0.47 | 0.00  | 0.00 | 2.25  | 1.08 | 5.39  | 0.21 | 8.17  | 3.66 | 0.71 | 0.23 | 0.65  | 0.12 | 0.55  | 0.15 |
| Native | Mz | 23 | E  | GPa | 7.81 | 0.40 | 10.00 | 0.51 | 7.97 | 0.40 | 10.68 | 0.52 | 17.56 | 0.99 | 19.91 | 1.13 | 25.04 | 1.42 | 7.13 | 0.40 | 13.73 | 0.78 | 15.46 | 0.88 |
| Native | Mz | 23 | Fe | %   | 0.00 | 0.00 | 0.00  | 0.00 | 0.00 | 0.00 | 0.00  | 0.00 | 0.21  | 0.16 | 2.99  | 0.54 | 16.00 | 1.55 | 0.00 | 0.00 | 0.00  | 0.00 | 0.00  | 0.00 |
| Native | Mz | 23 | H  | GPa | 0.94 | 0.05 | 1.20  | 0.06 | 0.98 | 0.07 | 1.26  | 0.09 | 2.28  | 0.16 | 2.59  | 0.18 | 3.25  | 0.22 | 0.93 | 0.06 | 1.65  | 0.09 | 2.01  | 0.14 |
| Native | Mz | 23 | Te | %   | 0.16 | 0.14 | 0.25  | 0.09 | 0.20 | 0.22 | 0.16  | 0.18 | 0.09  | 0.10 | 0.86  | 2.11 | 0.56  | 0.98 | 0.34 | 0.46 | 0.00  | 0.00 | 0.11  | 0.17 |
| Native | Mz | 24 | Ae | %   | 0.84 | 0.22 | 0.51  | 0.08 | 0.71 | 1.29 | 0.03  | 0.06 | 3.06  | 1.14 | 7.31  | 0.95 | 26.86 | 1.21 | 0.00 | 0.00 | 0.91  | 0.34 | 0.08  | 0.16 |
| Native | Mz | 24 | Ca | %   | 0.71 | 0.16 | 0.51  | 0.08 | 0.71 | 1.29 | 0.00  | 0.00 | 2.16  | 1.44 | 3.54  | 1.31 | 8.69  | 0.90 | 0.00 | 0.00 | 0.91  | 0.34 | 0.00  | 0.00 |
| Native | Mz | 24 | E  | GPa | 8.96 | 0.45 | 10.92 | 0.55 | 8.71 | 0.44 | 11.47 | 0.79 | 17.60 | 1.00 | 19.99 | 1.13 | 26.31 | 1.49 | 7.84 | 0.44 | 15.26 | 0.86 | 16.31 | 0.92 |
| Native | Mz | 24 | Fe | %   | 0.13 | 0.23 | 0.00  | 0.00 | 0.00 | 0.00 | 0.00  | 0.00 | 0.45  | 0.08 | 3.21  | 0.48 | 18.05 | 1.47 | 0.00 | 0.00 | 0.00  | 0.00 | 0.00  | 0.00 |
| Native | Mz | 24 | H  | GPa | 1.07 | 0.05 | 1.31  | 0.07 | 1.08 | 0.07 | 1.38  | 0.10 | 2.29  | 0.16 | 2.60  | 0.18 | 3.42  | 0.24 | 1.02 | 0.07 | 1.83  | 0.10 | 2.12  | 0.15 |
| Native | Mz | 24 | Te | %   | 0.00 | 0.00 | 0.00  | 0.00 | 0.00 | 0.00 | 0.03  | 0.06 | 0.45  | 0.42 | 0.55  | 0.88 | 0.12  | 0.25 | 0.00 | 0.00 | 0.00  | 0.00 | 0.08  | 0.16 |
| Native | Mz | 25 | Ae | %   | 0.04 | 0.07 | 0.47  | 0.29 | 0.14 | 0.34 | 0.00  | 0.00 | 4.54  | 1.66 | 8.70  | 1.47 | 30.58 | 2.20 | 0.00 | 0.00 | 1.16  | 1.34 | 0.00  | 0.00 |
| Native | Mz | 25 | Ca | %   | 0.00 | 0.00 | 0.20  | 0.34 | 0.14 | 0.34 | 0.00  | 0.00 | 2.99  | 2.34 | 4.34  | 1.29 | 10.01 | 1.76 | 0.00 | 0.00 | 1.16  | 1.34 | 0.00  | 0.00 |
| Native | Mz | 25 | E  | GPa | 8.91 | 0.45 | 11.65 | 0.59 | 9.09 | 0.46 | 11.65 | 0.81 | 17.79 | 1.01 | 20.85 | 1.18 | 27.28 | 1.54 | 7.84 | 0.44 | 14.65 | 0.83 | 17.12 | 0.97 |
| Native | Mz | 25 | Fe | %   | 0.00 | 0.00 | 0.00  | 0.00 | 0.00 | 0.00 | 0.00  | 0.00 | 0.60  | 0.07 | 4.26  | 0.62 | 19.47 | 1.80 | 0.00 | 0.00 | 0.00  | 0.00 | 0.00  | 0.00 |
| Native | Mz | 25 | H  | GPa | 1.07 | 0.05 | 1.40  | 0.07 | 1.12 | 0.08 | 1.40  | 0.10 | 2.31  | 0.16 | 2.71  | 0.19 | 3.54  | 0.25 | 1.02 | 0.07 | 1.76  | 0.10 | 2.22  | 0.15 |

|        |    |    |    |     |       |      |       |      |       |      |       |      |       |      |       |      |       |      |      |      |       |      |       |      |
|--------|----|----|----|-----|-------|------|-------|------|-------|------|-------|------|-------|------|-------|------|-------|------|------|------|-------|------|-------|------|
| Native | Mz | 25 | Te | %   | 0.04  | 0.07 | 0.27  | 0.15 | 0.00  | 0.00 | 0.00  | 0.00 | 0.95  | 0.83 | 0.10  | 0.25 | 1.10  | 1.41 | 0.00 | 0.00 | 0.00  | 0.00 | 0.00  | 0.00 |
| Native | Mz | 26 | Ae | %   | 2.66  | 3.50 | 2.33  | 2.95 | 2.01  | 2.09 | 1.01  | 0.28 | 2.72  | 2.57 | 10.79 | 1.46 | 35.79 | 1.17 | 0.00 | 0.00 | 0.65  | 0.14 | 0.58  | 0.11 |
| Native | Mz | 26 | Ca | %   | 2.62  | 3.53 | 2.33  | 2.95 | 2.01  | 2.09 | 1.01  | 0.28 | 2.20  | 1.31 | 6.09  | 1.30 | 10.39 | 1.59 | 0.00 | 0.00 | 0.65  | 0.14 | 0.58  | 0.11 |
| Native | Mz | 26 | E  | GPa | 10.00 | 0.51 | 11.67 | 0.59 | 10.20 | 0.51 | 11.88 | 0.64 | 17.77 | 1.01 | 21.71 | 1.23 | 28.46 | 1.61 | 6.78 | 0.38 | 15.26 | 0.86 | 17.37 | 0.98 |
| Native | Mz | 26 | Fe | %   | 0.04  | 0.08 | 0.00  | 0.00 | 0.00  | 0.00 | 0.00  | 0.00 | 0.06  | 0.05 | 4.49  | 0.73 | 24.61 | 2.21 | 0.00 | 0.00 | 0.00  | 0.00 | 0.00  | 0.00 |
| Native | Mz | 26 | H  | GPa | 1.20  | 0.06 | 1.40  | 0.07 | 1.26  | 0.09 | 1.43  | 0.08 | 2.31  | 0.16 | 2.82  | 0.19 | 3.70  | 0.26 | 0.88 | 0.06 | 1.83  | 0.10 | 2.26  | 0.16 |
| Native | Mz | 26 | Te | %   | 0.00  | 0.00 | 0.00  | 0.00 | 0.00  | 0.00 | 0.00  | 0.00 | 0.46  | 0.89 | 0.21  | 0.51 | 0.78  | 0.72 | 0.00 | 0.00 | 0.00  | 0.00 | 0.00  | 0.00 |
| Native | Mz | 27 | Ae | %   | 0.00  | 0.00 | 0.46  | 0.40 | 0.97  | 1.23 | 0.00  | 0.00 | 2.82  | 1.79 | 9.62  | 1.56 | 33.81 | 4.14 | 0.64 | 1.11 | 0.11  | 0.14 | 0.00  | 0.00 |
| Native | Mz | 27 | Ca | %   | 0.00  | 0.00 | 0.46  | 0.40 | 0.97  | 1.23 | 0.00  | 0.00 | 2.05  | 1.28 | 4.36  | 1.28 | 7.53  | 2.29 | 0.16 | 0.25 | 0.11  | 0.14 | 0.00  | 0.00 |
| Native | Mz | 27 | E  | GPa | 9.45  | 0.48 | 12.19 | 0.62 | 9.64  | 0.48 | 12.80 | 0.88 | 17.81 | 1.01 | 19.86 | 1.12 | 28.73 | 1.63 | 7.39 | 0.42 | 15.02 | 0.70 | 17.37 | 0.98 |
| Native | Mz | 27 | Fe | %   | 0.00  | 0.00 | 0.00  | 0.00 | 0.00  | 0.00 | 0.00  | 0.00 | 0.37  | 0.12 | 5.23  | 0.42 | 25.85 | 2.69 | 0.00 | 0.00 | 0.00  | 0.00 | 0.00  | 0.00 |
| Native | Mz | 27 | H  | GPa | 1.13  | 0.06 | 1.46  | 0.07 | 1.19  | 0.08 | 1.54  | 0.11 | 2.31  | 0.16 | 2.58  | 0.18 | 3.73  | 0.26 | 0.96 | 0.07 | 1.80  | 0.08 | 2.26  | 0.16 |
| Native | Mz | 27 | Te | %   | 0.00  | 0.00 | 0.00  | 0.00 | 0.00  | 0.00 | 0.00  | 0.00 | 0.40  | 0.48 | 0.04  | 0.06 | 0.43  | 0.82 | 0.47 | 1.16 | 0.00  | 0.00 | 0.00  | 0.00 |
| Native | Wz | 28 | Ae | %   | 0.20  | 0.29 | 0.15  | 0.26 | 0.82  | 1.30 | 0.22  | 0.35 | 5.60  | 1.27 | 12.29 | 1.45 | 33.08 | 3.87 | 0.00 | 0.00 | 0.65  | 0.54 | 0.41  | 0.32 |
| Native | Wz | 28 | Ca | %   | 0.20  | 0.29 | 0.15  | 0.26 | 0.82  | 1.30 | 0.21  | 0.33 | 2.96  | 0.07 | 4.64  | 1.61 | 7.64  | 1.26 | 0.00 | 0.00 | 0.65  | 0.54 | 0.41  | 0.32 |
| Native | Wz | 28 | E  | GPa | 10.54 | 0.75 | 13.28 | 0.67 | 10.20 | 0.51 | 13.95 | 0.96 | 17.81 | 1.01 | 19.75 | 1.22 | 31.93 | 1.81 | 6.78 | 0.38 | 15.26 | 0.86 | 16.31 | 0.92 |
| Native | Wz | 28 | Fe | %   | 0.00  | 0.00 | 0.00  | 0.00 | 0.00  | 0.00 | 0.00  | 0.00 | 0.36  | 0.16 | 6.29  | 0.56 | 25.07 | 3.46 | 0.00 | 0.00 | 0.00  | 0.00 | 0.00  | 0.00 |
| Native | Wz | 28 | H  | GPa | 1.26  | 0.09 | 1.59  | 0.08 | 1.26  | 0.09 | 1.67  | 0.12 | 2.31  | 0.16 | 2.52  | 0.18 | 4.15  | 0.29 | 0.88 | 0.06 | 1.83  | 0.10 | 2.12  | 0.15 |
| Native | Wz | 28 | Te | %   | 0.00  | 0.00 | 0.00  | 0.00 | 0.00  | 0.00 | 0.01  | 0.03 | 2.29  | 1.77 | 1.35  | 0.61 | 0.37  | 0.58 | 0.00 | 0.00 | 0.00  | 0.00 | 0.00  | 0.00 |
| Native | Wz | 29 | Ae | %   | 0.00  | 0.00 | 0.00  | 0.00 | 0.33  | 0.81 | 0.00  | 0.00 | 4.18  | 1.74 | 11.65 | 1.64 | 36.30 | 4.24 | 0.00 | 0.00 | 0.78  | 0.14 | 0.55  | 0.11 |
| Native | Wz | 29 | Ca | %   | 0.00  | 0.00 | 0.00  | 0.00 | 0.33  | 0.81 | 0.00  | 0.00 | 3.15  | 0.28 | 4.55  | 1.32 | 6.50  | 0.98 | 0.00 | 0.00 | 0.78  | 0.14 | 0.55  | 0.11 |
| Native | Wz | 29 | E  | GPa | 11.10 | 0.56 | 15.21 | 0.77 | 11.32 | 0.57 | 15.09 | 1.04 | 17.43 | 0.99 | 19.76 | 1.12 | 31.79 | 1.80 | 7.14 | 0.40 | 15.26 | 0.86 | 17.12 | 0.97 |
| Native | Wz | 29 | Fe | %   | 0.00  | 0.00 | 0.00  | 0.00 | 0.00  | 0.00 | 0.00  | 0.00 | 0.49  | 0.13 | 6.50  | 0.46 | 28.54 | 4.47 | 0.00 | 0.00 | 0.00  | 0.00 | 0.00  | 0.00 |
| Native | Wz | 29 | H  | GPa | 1.33  | 0.07 | 1.83  | 0.09 | 1.40  | 0.10 | 1.81  | 0.13 | 2.26  | 0.16 | 2.57  | 0.18 | 4.13  | 0.29 | 0.93 | 0.06 | 1.83  | 0.10 | 2.22  | 0.15 |
| Native | Wz | 29 | Te | %   | 0.00  | 0.00 | 0.00  | 0.00 | 0.00  | 0.00 | 0.00  | 0.00 | 0.55  | 0.97 | 0.60  | 0.48 | 1.25  | 1.50 | 0.00 | 0.00 | 0.00  | 0.00 | 0.00  | 0.00 |
| Native | Wz | 30 | Ae | %   | 0.87  | 0.20 | 0.95  | 0.06 | 0.82  | 1.30 | 0.00  | 0.00 | 5.68  | 1.15 | 12.43 | 0.58 | 36.37 | 2.16 | 0.81 | 0.07 | 0.34  | 0.83 | 1.26  | 0.54 |
| Native | Wz | 30 | Ca | %   | 0.87  | 0.20 | 0.95  | 0.06 | 0.82  | 1.30 | 0.00  | 0.00 | 4.00  | 1.47 | 5.60  | 0.35 | 7.17  | 1.13 | 0.81 | 0.07 | 0.34  | 0.83 | 1.26  | 0.54 |
| Native | Wz | 30 | E  | GPa | 12.30 | 0.62 | 16.40 | 0.83 | 11.83 | 0.59 | 16.24 | 1.12 | 16.98 | 0.96 | 20.42 | 1.16 | 30.73 | 1.74 | 7.55 | 0.43 | 16.33 | 0.92 | 17.37 | 0.98 |
| Native | Wz | 30 | Fe | %   | 0.00  | 0.00 | 0.00  | 0.00 | 0.00  | 0.00 | 0.00  | 0.00 | 0.41  | 0.23 | 6.51  | 0.50 | 28.71 | 2.01 | 0.00 | 0.00 | 0.00  | 0.00 | 0.00  | 0.00 |
| Native | Wz | 30 | H  | GPa | 1.48  | 0.07 | 1.97  | 0.10 | 1.46  | 0.10 | 1.95  | 0.13 | 2.21  | 0.15 | 2.65  | 0.18 | 3.99  | 0.28 | 0.98 | 0.07 | 1.96  | 0.11 | 2.26  | 0.16 |
| Native | Wz | 30 | Te | %   | 0.00  | 0.00 | 0.00  | 0.00 | 0.00  | 0.00 | 0.00  | 0.00 | 1.27  | 1.24 | 0.32  | 0.60 | 0.48  | 0.54 | 0.00 | 0.00 | 0.00  | 0.00 | 0.00  | 0.00 |
| Native | Wz | 31 | Ae | %   | 0.37  | 0.65 | 0.00  | 0.00 | 1.02  | 1.57 | 0.00  | 0.00 | 4.80  | 2.05 | 11.70 | 1.53 | 31.27 | 2.10 | 0.71 | 1.70 | 2.24  | 1.26 | 0.00  | 0.00 |
| Native | Wz | 31 | Ca | %   | 0.00  | 0.00 | 0.00  | 0.00 | 1.02  | 1.57 | 0.00  | 0.00 | 2.98  | 0.16 | 4.70  | 1.25 | 6.13  | 1.82 | 0.00 | 0.00 | 2.24  | 1.26 | 0.00  | 0.00 |
| Native | Wz | 31 | E  | GPa | 11.80 | 0.60 | 16.43 | 0.83 | 11.33 | 0.57 | 16.25 | 1.12 | 16.51 | 0.93 | 18.43 | 1.04 | 31.16 | 1.76 | 8.13 | 0.46 | 15.46 | 0.87 | 17.37 | 0.98 |
| Native | Wz | 31 | Fe | %   | 0.37  | 0.65 | 0.00  | 0.00 | 0.00  | 0.00 | 0.00  | 0.00 | 0.60  | 0.07 | 6.42  | 0.54 | 24.72 | 2.76 | 0.00 | 0.00 | 0.00  | 0.00 | 0.00  | 0.00 |
| Native | Wz | 31 | H  | GPa | 1.42  | 0.07 | 1.97  | 0.10 | 1.40  | 0.10 | 1.95  | 0.13 | 2.14  | 0.15 | 2.39  | 0.17 | 4.05  | 0.28 | 1.06 | 0.07 | 1.85  | 0.10 | 2.26  | 0.16 |
| Native | Wz | 31 | Te | %   | 0.00  | 0.00 | 0.00  | 0.00 | 0.00  | 0.00 | 0.00  | 0.00 | 1.21  | 1.86 | 0.58  | 0.64 | 0.42  | 0.93 | 0.71 | 1.70 | 0.00  | 0.00 | 0.00  | 0.00 |
| Native | Wz | 32 | Ae | %   | 0.33  | 0.58 | 0.88  | 0.15 | 1.09  | 1.20 | 0.00  | 0.00 | 3.65  | 1.81 | 11.99 | 1.43 | 33.06 | 3.84 | 0.31 | 0.49 | 1.40  | 0.46 | 0.98  | 0.17 |
| Native | Wz | 32 | Ca | %   | 0.33  | 0.58 | 0.88  | 0.15 | 1.09  | 1.20 | 0.00  | 0.00 | 2.96  | 0.19 | 4.61  | 1.42 | 5.19  | 1.41 | 0.31 | 0.49 | 1.40  | 0.46 | 0.98  | 0.17 |
| Native | Wz | 32 | E  | GPa | 12.20 | 0.62 | 16.57 | 0.84 | 12.44 | 0.62 | 17.40 | 1.20 | 17.63 | 1.00 | 19.79 | 1.12 | 31.79 | 1.80 | 7.39 | 0.42 | 15.26 | 0.86 | 17.47 | 0.99 |
| Native | Wz | 32 | Fe | %   | 0.00  | 0.00 | 0.00  | 0.00 | 0.00  | 0.00 | 0.00  | 0.00 | 0.54  | 0.17 | 6.36  | 0.92 | 26.66 | 3.07 | 0.00 | 0.00 | 0.00  | 0.00 | 0.00  | 0.00 |
| Native | Wz | 32 | H  | GPa | 1.46  | 0.07 | 1.99  | 0.10 | 1.54  | 0.11 | 2.09  | 0.14 | 2.29  | 0.16 | 2.57  | 0.18 | 4.13  | 0.29 | 0.96 | 0.07 | 1.83  | 0.10 | 2.27  | 0.16 |
| Native | Wz | 32 | Te | %   | 0.00  | 0.00 | 0.00  | 0.00 | 0.00  | 0.00 | 0.00  | 0.00 | 0.16  | 0.19 | 1.02  | 1.35 | 1.20  | 1.87 | 0.00 | 0.00 | 0.00  | 0.00 | 0.00  | 0.00 |
| Native | Wz | 33 | Ae | %   | 0.00  | 0.00 | 1.66  | 2.88 | 0.65  | 1.01 | 0.00  | 0.00 | 4.05  | 0.20 | 11.39 | 1.29 | 32.15 | 3.27 | 0.00 | 0.00 | 1.19  | 0.92 | 0.60  | 0.51 |
| Native | Wz | 33 | Ca | %   | 0.00  | 0.00 | 1.66  | 2.88 | 0.65  | 1.01 | 0.00  | 0.00 | 3.02  | 0.13 | 4.61  | 1.34 | 5.84  | 0.84 | 0.00 | 0.00 | 1.19  | 0.92 | 0.60  | 0.51 |
| Native | Wz | 33 | E  | GPa | 12.74 | 0.65 | 17.21 | 0.87 | 13.00 | 0.65 | 17.34 | 0.96 | 16.78 | 1.14 | 19.33 | 1.30 | 29.33 | 2.05 | 6.78 | 0.38 | 15.26 | 0.86 | 16.99 | 0.96 |
| Native | Wz | 33 | Fe | %   | 0.00  | 0.00 | 0.00  | 0.00 | 0.00  | 0.00 | 0.00  | 0.00 | 0.71  | 0.28 | 6.74  | 0.89 | 26.03 | 3.27 | 0.00 | 0.00 | 0.00  | 0.00 | 0.00  | 0.00 |
| Native | Wz | 33 | H  | GPa | 1.53  | 0.08 | 2.07  | 0.10 | 1.61  | 0.11 | 2.08  | 0.12 | 2.13  | 0.15 | 2.46  | 0.17 | 3.72  | 0.26 | 0.88 | 0.06 | 1.83  | 0.10 | 2.21  | 0.15 |
| Native | Wz | 33 | Te | %   | 0.00  | 0.00 | 0.00  | 0.00 | 0.00  | 0.00 | 0.00  | 0.00 | 0.32  | 0.49 | 0.03  | 0.08 | 0.28  | 0.37 | 0.00 | 0.00 | 0.00  | 0.00 | 0.00  | 0.00 |
| Native | Wz | 34 | Ae | %   | 1.14  | 0.81 | 1.02  | 0.60 | 1.20  | 1.36 | 0.00  | 0.00 | 3.73  | 0.66 | 10.03 | 1.76 | 34.21 | 1.88 | 0.00 | 0.00 | 0.60  | 0.45 | 0.00  | 0.00 |
| Native | Wz | 34 | Ca | %   | 0.97  | 0.52 | 1.02  | 0.60 | 1.20  | 1.36 | 0.00  | 0.00 | 3.04  | 0.14 | 2.91  | 0.16 | 4.86  | 1.75 | 0.00 | 0.00 | 0.60  | 0.45 | 0.00  | 0.00 |
| Native | Wz | 34 | E  | GPa | 12.20 | 0.62 | 17.13 | 0.87 | 12.45 | 0.62 | 17.22 | 0.95 | 17.70 | 1.00 | 19.81 | 1.12 | 31.71 | 1.79 | 7.14 | 0.40 | 15.33 | 0.94 | 17.20 | 0.97 |
| Native | Wz | 34 | Fe | %   | 0.15  | 0.26 | 0.00  | 0.00 | 0.00  | 0.00 | 0.00  | 0.00 | 0.24  | 0.14 | 6.39  | 0.93 | 26.97 | 1.88 | 0.00 | 0.00 | 0.00  | 0.00 | 0.00  | 0.00 |
| Native | Wz | 34 | H  | GPa | 1.46  | 0.07 | 2.06  | 0.10 | 1.54  | 0.11 | 2.07  | 0.11 | 2.30  | 0.16 | 2.57  | 0.18 | 4.12  | 0.28 | 0.93 | 0.06 | 1.84  | 0.11 | 2.06  | 0.12 |

|         |    |    |    |     |       |      |       |      |       |      |       |      |       |      |       |      |       |      |      |      |       |      |       |      |
|---------|----|----|----|-----|-------|------|-------|------|-------|------|-------|------|-------|------|-------|------|-------|------|------|------|-------|------|-------|------|
| Native  | Wz | 34 | Te | %   | 0.02  | 0.03 | 0.00  | 0.00 | 0.00  | 0.00 | 0.00  | 0.00 | 0.46  | 1.12 | 0.74  | 1.30 | 2.38  | 1.09 | 0.00 | 0.00 | 0.00  | 0.00 | 0.00  | 0.00 |
| Native  | Wz | 35 | Ae | %   | 2.68  | 3.66 | 0.52  | 0.90 | 1.75  | 1.20 | 2.97  | 1.55 | 4.04  | 1.03 | 10.67 | 0.69 | 33.26 | 2.83 | 1.19 | 1.84 | 0.84  | 2.06 | 0.55  | 0.43 |
| Native  | Wz | 35 | Ca | %   | 2.68  | 3.66 | 0.52  | 0.90 | 1.75  | 1.20 | 2.97  | 1.55 | 3.83  | 1.20 | 3.03  | 0.30 | 4.79  | 0.29 | 1.19 | 1.84 | 0.84  | 2.06 | 0.55  | 0.43 |
| Native  | Wz | 35 | E  | GPa | 12.20 | 0.62 | 17.78 | 0.59 | 12.47 | 0.58 | 17.29 | 0.83 | 17.21 | 0.97 | 19.46 | 1.31 | 29.58 | 2.06 | 7.55 | 0.43 | 15.26 | 0.86 | 17.12 | 0.97 |
| Native  | Wz | 35 | Fe | %   | 0.00  | 0.00 | 0.00  | 0.00 | 0.00  | 0.00 | 0.00  | 0.00 | 0.09  | 0.07 | 7.51  | 0.73 | 26.65 | 3.07 | 0.00 | 0.00 | 0.00  | 0.00 | 0.00  | 0.00 |
| Native  | Wz | 35 | H  | GPa | 1.46  | 0.07 | 2.05  | 0.10 | 1.55  | 0.11 | 2.05  | 0.11 | 2.24  | 0.15 | 2.47  | 0.17 | 3.75  | 0.26 | 0.98 | 0.07 | 1.83  | 0.10 | 2.05  | 0.12 |
| Native  | Wz | 35 | Te | %   | 0.00  | 0.00 | 0.00  | 0.00 | 0.00  | 0.00 | 0.00  | 0.00 | 0.12  | 0.29 | 0.14  | 0.22 | 1.82  | 1.68 | 0.00 | 0.00 | 0.00  | 0.00 | 0.00  | 0.00 |
| Native  | Wz | 36 | Ae | %   | 2.56  | 1.15 | 1.38  | 1.20 | 1.31  | 1.22 | 1.47  | 2.28 | 4.54  | 1.08 | 8.62  | 2.83 | 34.27 | 2.79 | 0.00 | 0.00 | 1.41  | 1.61 | 0.00  | 0.00 |
| Native  | Wz | 36 | Ca | %   | 2.01  | 0.32 | 1.38  | 1.20 | 1.31  | 1.22 | 1.45  | 2.25 | 3.81  | 1.44 | 3.70  | 1.21 | 5.44  | 1.28 | 0.00 | 0.00 | 1.41  | 1.61 | 0.00  | 0.00 |
| Native  | Wz | 36 | E  | GPa | 12.11 | 0.61 | 17.32 | 0.47 | 12.35 | 0.62 | 17.01 | 0.56 | 16.88 | 0.96 | 19.54 | 1.11 | 32.06 | 1.81 | 8.31 | 0.34 | 15.26 | 0.86 | 16.06 | 0.91 |
| Native  | Wz | 36 | Fe | %   | 0.55  | 0.95 | 0.00  | 0.00 | 0.00  | 0.00 | 0.00  | 0.00 | 0.10  | 0.08 | 4.62  | 1.63 | 27.29 | 2.29 | 0.00 | 0.00 | 0.00  | 0.00 | 0.00  | 0.00 |
| Native  | Wz | 36 | H  | GPa | 1.45  | 0.07 | 1.86  | 0.09 | 1.53  | 0.11 | 2.00  | 0.11 | 2.19  | 0.15 | 2.54  | 0.18 | 4.16  | 0.29 | 1.06 | 0.07 | 1.83  | 0.10 | 1.93  | 0.11 |
| Native  | Wz | 36 | Te | %   | 0.00  | 0.00 | 0.00  | 0.00 | 0.00  | 0.00 | 0.02  | 0.04 | 0.63  | 1.02 | 0.31  | 0.47 | 1.54  | 1.91 | 0.00 | 0.00 | 0.00  | 0.00 | 0.00  | 0.00 |
| Native  | Wz | 37 | Ae | %   | 1.02  | 0.87 | 1.49  | 1.36 | 1.69  | 1.99 | 0.00  | 0.00 | 3.94  | 2.15 | 10.59 | 0.92 | 34.66 | 4.38 | 0.04 | 0.10 | 2.44  | 2.79 | 0.00  | 0.00 |
| Native  | Wz | 37 | Ca | %   | 0.64  | 1.12 | 1.49  | 1.36 | 1.69  | 1.99 | 0.00  | 0.00 | 3.76  | 1.32 | 4.14  | 1.45 | 5.69  | 0.87 | 0.00 | 0.00 | 2.44  | 2.79 | 0.00  | 0.00 |
| Native  | Wz | 37 | E  | GPa | 13.41 | 0.68 | 16.72 | 0.85 | 12.73 | 0.64 | 17.09 | 0.56 | 16.78 | 0.95 | 20.42 | 1.16 | 30.13 | 1.56 | 7.60 | 0.33 | 15.26 | 0.86 | 16.31 | 0.92 |
| Native  | Wz | 37 | Fe | %   | 0.00  | 0.00 | 0.00  | 0.00 | 0.00  | 0.00 | 0.00  | 0.00 | 0.13  | 0.02 | 6.38  | 0.84 | 26.55 | 1.60 | 0.00 | 0.00 | 0.00  | 0.00 | 0.00  | 0.00 |
| Native  | Wz | 37 | H  | GPa | 1.61  | 0.08 | 2.01  | 0.10 | 1.57  | 0.11 | 2.01  | 0.11 | 2.18  | 0.15 | 2.65  | 0.18 | 3.75  | 0.29 | 0.87 | 0.06 | 1.83  | 0.10 | 1.96  | 0.11 |
| Native  | Wz | 37 | Te | %   | 0.37  | 0.48 | 0.00  | 0.00 | 0.00  | 0.00 | 0.00  | 0.00 | 0.06  | 0.10 | 0.07  | 0.17 | 2.42  | 3.11 | 0.04 | 0.10 | 0.00  | 0.00 | 0.00  | 0.00 |
| Native  | Wz | 38 | Ae | %   | 0.93  | 0.10 | 0.61  | 0.87 | 1.05  | 1.16 | 0.00  | 0.00 | 4.51  | 1.39 | 9.98  | 1.64 | 35.59 | 6.32 | 0.00 | 0.00 | 1.18  | 1.82 | 0.00  | 0.00 |
| Native  | Wz | 38 | Ca | %   | 0.93  | 0.10 | 0.61  | 0.87 | 1.05  | 1.16 | 0.00  | 0.00 | 4.42  | 1.31 | 4.07  | 1.16 | 6.08  | 1.29 | 0.00 | 0.00 | 1.18  | 1.82 | 0.00  | 0.00 |
| Native  | Wz | 38 | E  | GPa | 12.56 | 0.64 | 17.45 | 1.25 | 12.81 | 0.64 | 17.47 | 0.97 | 16.78 | 0.95 | 20.72 | 1.17 | 29.72 | 2.07 | 7.55 | 0.43 | 15.26 | 0.86 | 16.89 | 0.96 |
| Native  | Wz | 38 | Fe | %   | 0.00  | 0.00 | 0.00  | 0.00 | 0.00  | 0.00 | 0.00  | 0.00 | 0.09  | 0.07 | 5.84  | 0.57 | 25.80 | 1.86 | 0.00 | 0.00 | 0.00  | 0.00 | 0.00  | 0.00 |
| Native  | Wz | 38 | H  | GPa | 1.51  | 0.08 | 2.09  | 0.15 | 1.58  | 0.11 | 2.10  | 0.12 | 2.18  | 0.15 | 2.69  | 0.19 | 3.77  | 0.26 | 0.98 | 0.07 | 1.83  | 0.10 | 2.03  | 0.11 |
| Native  | Wz | 38 | Te | %   | 0.00  | 0.00 | 0.00  | 0.00 | 0.00  | 0.00 | 0.00  | 0.00 | 0.00  | 0.00 | 0.06  | 0.15 | 3.71  | 4.91 | 0.00 | 0.00 | 0.00  | 0.00 | 0.00  | 0.00 |
| Native  | Wz | 39 | Ae | %   | 1.22  | 2.10 | 1.97  | 1.72 | 2.06  | 1.47 | 1.58  | 2.11 | 4.51  | 1.28 | 11.55 | 1.97 | 39.52 | 2.90 | 1.95 | 1.17 | 1.95  | 1.55 | 0.00  | 0.00 |
| Native  | Wz | 39 | Ca | %   | 1.22  | 2.10 | 1.97  | 1.72 | 2.06  | 1.47 | 1.58  | 2.11 | 4.38  | 1.30 | 4.82  | 0.90 | 6.04  | 1.08 | 1.89 | 1.16 | 1.77  | 1.77 | 0.00  | 0.00 |
| Native  | Wz | 39 | E  | GPa | 12.67 | 0.64 | 17.18 | 0.87 | 13.11 | 0.51 | 16.79 | 0.63 | 18.12 | 1.03 | 21.31 | 1.21 | 30.69 | 2.12 | 8.27 | 0.47 | 15.33 | 0.94 | 16.31 | 0.92 |
| Native  | Wz | 39 | Fe | %   | 0.00  | 0.00 | 0.00  | 0.00 | 0.00  | 0.00 | 0.00  | 0.00 | 0.12  | 0.10 | 6.60  | 1.17 | 30.23 | 2.21 | 0.00 | 0.00 | 0.18  | 0.25 | 0.00  | 0.00 |
| Native  | Wz | 39 | H  | GPa | 1.52  | 0.08 | 2.06  | 0.10 | 1.63  | 0.09 | 2.05  | 0.11 | 2.35  | 0.16 | 2.77  | 0.19 | 3.89  | 0.27 | 1.07 | 0.07 | 1.84  | 0.11 | 1.96  | 0.11 |
| Native  | Wz | 39 | Te | %   | 0.00  | 0.00 | 0.00  | 0.00 | 0.00  | 0.00 | 0.00  | 0.00 | 0.00  | 0.00 | 0.13  | 0.20 | 3.25  | 3.80 | 0.06 | 0.15 | 0.00  | 0.00 | 0.00  | 0.00 |
| Treated | Rs | 1  | Ae | %   | 0.00  | 0.00 | 0.00  | 0.00 | 0.00  | 0.00 | 0.00  | 0.00 | 0.00  | 0.00 | 0.00  | 0.00 | 0.00  | 0.00 | 0.00 | 0.00 | 0.00  | 0.41 | 0.63  |      |
| Treated | Rs | 1  | Ca | %   | 0.00  | 0.00 | 0.00  | 0.00 | 0.00  | 0.00 | 0.00  | 0.00 | 0.00  | 0.00 | 0.00  | 0.00 | 0.00  | 0.00 | 0.00 | 0.00 | 0.00  | 0.00 | 0.00  | 0.00 |
| Treated | Rs | 1  | E  | GPa | 1.75  | 0.09 | 1.92  | 0.10 | 2.26  | 0.17 | 2.61  | 0.32 | 2.57  | 0.13 | 2.05  | 0.38 | 2.31  | 0.13 | 2.26 | 0.28 | 2.48  | 0.46 | 2.54  | 0.34 |
| Treated | Rs | 1  | Fe | %   | 0.00  | 0.00 | 0.00  | 0.00 | 0.00  | 0.00 | 0.00  | 0.00 | 0.00  | 0.00 | 0.00  | 0.00 | 0.00  | 0.00 | 0.00 | 0.00 | 0.00  | 0.41 | 0.63  |      |
| Treated | Rs | 1  | H  | GPa | 0.21  | 0.01 | 0.23  | 0.01 | 0.28  | 0.02 | 0.33  | 0.05 | 0.27  | 0.02 | 0.27  | 0.04 | 0.32  | 0.02 | 0.30 | 0.04 | 0.32  | 0.06 | 0.24  | 0.05 |
| Treated | Rs | 1  | Te | %   | 0.00  | 0.00 | 0.00  | 0.00 | 0.00  | 0.00 | 0.00  | 0.00 | 0.00  | 0.00 | 0.00  | 0.00 | 0.00  | 0.00 | 0.00 | 0.00 | 0.00  | 0.00 | 0.00  | 0.00 |
| Treated | Rs | 2  | Ae | %   | 0.00  | 0.00 | 0.00  | 0.00 | 0.00  | 0.00 | 0.07  | 0.16 | 0.00  | 0.00 | 0.01  | 0.02 | 0.00  | 0.00 | 0.00 | 0.00 | 0.00  | 0.00 | 0.00  | 0.00 |
| Treated | Rs | 2  | Ca | %   | 0.00  | 0.00 | 0.00  | 0.00 | 0.00  | 0.00 | 0.00  | 0.00 | 0.00  | 0.00 | 0.00  | 0.00 | 0.00  | 0.00 | 0.00 | 0.00 | 0.00  | 0.00 | 0.00  | 0.00 |
| Treated | Rs | 2  | E  | GPa | 1.82  | 0.12 | 1.96  | 0.10 | 2.30  | 0.20 | 2.49  | 0.37 | 2.71  | 0.14 | 1.98  | 0.11 | 2.69  | 0.50 | 2.43 | 0.16 | 2.67  | 0.18 | 2.47  | 0.25 |
| Treated | Rs | 2  | Fe | %   | 0.00  | 0.00 | 0.00  | 0.00 | 0.00  | 0.00 | 0.07  | 0.16 | 0.00  | 0.00 | 0.01  | 0.02 | 0.00  | 0.00 | 0.00 | 0.00 | 0.00  | 0.00 | 0.00  | 0.00 |
| Treated | Rs | 2  | H  | GPa | 0.21  | 0.01 | 0.23  | 0.01 | 0.27  | 0.02 | 0.31  | 0.03 | 0.29  | 0.02 | 0.26  | 0.02 | 0.47  | 0.03 | 0.32 | 0.03 | 0.34  | 0.02 | 0.23  | 0.03 |
| Treated | Rs | 2  | Te | %   | 0.00  | 0.00 | 0.00  | 0.00 | 0.00  | 0.00 | 0.00  | 0.00 | 0.00  | 0.00 | 0.00  | 0.00 | 0.00  | 0.00 | 0.00 | 0.00 | 0.00  | 0.00 | 0.00  | 0.00 |
| Treated | Rs | 3  | Ae | %   | 0.00  | 0.00 | 0.00  | 0.00 | 0.00  | 0.00 | 0.00  | 0.00 | 0.00  | 0.00 | 0.00  | 0.00 | 0.00  | 0.00 | 0.00 | 0.28 | 0.44  | 0.00 | 0.00  | 0.00 |
| Treated | Rs | 3  | Ca | %   | 0.00  | 0.00 | 0.00  | 0.00 | 0.00  | 0.00 | 0.00  | 0.00 | 0.00  | 0.00 | 0.00  | 0.00 | 0.00  | 0.00 | 0.00 | 0.00 | 0.00  | 0.00 | 0.00  | 0.00 |
| Treated | Rs | 3  | E  | GPa | 1.87  | 0.16 | 2.00  | 0.13 | 2.27  | 0.13 | 2.36  | 0.19 | 3.80  | 0.19 | 2.02  | 0.11 | 4.00  | 0.89 | 2.60 | 0.34 | 2.83  | 0.23 | 2.70  | 0.57 |
| Treated | Rs | 3  | Fe | %   | 0.00  | 0.00 | 0.00  | 0.00 | 0.00  | 0.00 | 0.00  | 0.00 | 0.00  | 0.00 | 0.00  | 0.00 | 0.00  | 0.00 | 0.00 | 0.28 | 0.44  | 0.00 | 0.00  | 0.00 |
| Treated | Rs | 3  | H  | GPa | 0.22  | 0.02 | 0.24  | 0.02 | 0.25  | 0.02 | 0.32  | 0.05 | 0.40  | 0.03 | 0.26  | 0.02 | 0.53  | 0.08 | 0.34 | 0.05 | 0.36  | 0.03 | 0.26  | 0.08 |
| Treated | Rs | 3  | Te | %   | 0.00  | 0.00 | 0.00  | 0.00 | 0.00  | 0.00 | 0.00  | 0.00 | 0.00  | 0.00 | 0.00  | 0.00 | 0.00  | 0.00 | 0.00 | 0.00 | 0.00  | 0.00 | 0.00  | 0.00 |
| Treated | Rs | 4  | Ae | %   | 0.48  | 0.52 | 0.20  | 0.28 | 0.00  | 0.00 | 0.00  | 0.00 | 0.00  | 0.00 | 0.00  | 0.00 | 0.03  | 0.05 | 0.00 | 0.00 | 0.00  | 0.00 | 0.00  | 0.00 |
| Treated | Rs | 4  | Ca | %   | 0.00  | 0.00 | 0.00  | 0.00 | 0.00  | 0.00 | 0.00  | 0.00 | 0.00  | 0.00 | 0.00  | 0.00 | 0.03  | 0.05 | 0.00 | 0.00 | 0.00  | 0.00 | 0.00  | 0.00 |
| Treated | Rs | 4  | E  | GPa | 1.88  | 0.15 | 2.16  | 0.13 | 2.30  | 0.15 | 2.45  | 0.35 | 3.72  | 0.19 | 2.09  | 0.12 | 3.68  | 0.20 | 3.07 | 0.49 | 2.96  | 0.68 | 2.65  | 0.58 |
| Treated | Rs | 4  | Fe | %   | 0.13  | 0.23 | 0.20  | 0.28 | 0.00  | 0.00 | 0.00  | 0.00 | 0.00  | 0.00 | 0.00  | 0.00 | 0.00  | 0.00 | 0.00 | 0.00 | 0.00  | 0.00 | 0.00  | 0.00 |
| Treated | Rs | 4  | H  | GPa | 0.22  | 0.02 | 0.26  | 0.02 | 0.26  | 0.02 | 0.32  | 0.03 | 0.39  | 0.03 | 0.27  | 0.02 | 0.51  | 0.04 | 0.40 | 0.07 | 0.38  | 0.09 | 0.25  | 0.08 |

|         |    |    |    |     |      |      |      |      |      |      |      |      |      |      |      |      |       |      |      |      |      |      |      |      |      |
|---------|----|----|----|-----|------|------|------|------|------|------|------|------|------|------|------|------|-------|------|------|------|------|------|------|------|------|
| Treated | Rs | 4  | Te | %   | 0.35 | 0.60 | 0.00 | 0.00 | 0.00 | 0.00 | 0.00 | 0.00 | 0.00 | 0.00 | 0.00 | 0.00 | 0.00  | 0.00 | 0.00 | 0.00 | 0.00 | 0.00 | 0.00 |      |      |
| Treated | Rs | 5  | Ae | %   | 0.00 | 0.00 | 0.00 | 0.00 | 0.00 | 0.00 | 0.05 | 0.12 | 0.00 | 0.00 | 0.01 | 0.03 | 0.10  | 0.08 | 0.00 | 0.00 | 0.30 | 0.43 | 0.00 | 0.00 |      |
| Treated | Rs | 5  | Ca | %   | 0.00 | 0.00 | 0.00 | 0.00 | 0.00 | 0.00 | 0.00 | 0.00 | 0.00 | 0.00 | 0.00 | 0.00 | 0.08  | 0.09 | 0.00 | 0.00 | 0.00 | 0.00 | 0.00 | 0.00 |      |
| Treated | Rs | 5  | E  | GPa | 1.79 | 0.09 | 2.06 | 0.19 | 2.34 | 0.18 | 2.45 | 0.26 | 4.04 | 0.20 | 1.36 | 0.08 | 4.71  | 0.26 | 3.05 | 0.60 | 2.84 | 0.83 | 2.72 | 0.54 |      |
| Treated | Rs | 5  | Fe | %   | 0.00 | 0.00 | 0.00 | 0.00 | 0.00 | 0.00 | 0.05 | 0.12 | 0.00 | 0.00 | 0.00 | 0.00 | 0.00  | 0.00 | 0.00 | 0.28 | 0.44 | 0.00 | 0.00 |      |      |
| Treated | Rs | 5  | H  | GPa | 0.21 | 0.01 | 0.25 | 0.02 | 0.26 | 0.02 | 0.34 | 0.06 | 0.43 | 0.03 | 0.18 | 0.01 | 0.65  | 0.05 | 0.40 | 0.08 | 0.37 | 0.11 | 0.26 | 0.07 |      |
| Treated | Rs | 5  | Te | %   | 0.00 | 0.00 | 0.00 | 0.00 | 0.00 | 0.00 | 0.00 | 0.00 | 0.00 | 0.00 | 0.01 | 0.03 | 0.02  | 0.05 | 0.00 | 0.00 | 0.02 | 0.04 | 0.00 | 0.00 |      |
| Treated | Rs | 6  | Ae | %   | 0.00 | 0.00 | 0.01 | 0.02 | 0.00 | 0.00 | 0.00 | 0.00 | 0.00 | 0.00 | 0.00 | 0.07 | 0.16  | 0.71 | 0.77 | 0.03 | 0.07 | 0.04 | 0.11 | 0.00 | 0.00 |
| Treated | Rs | 6  | Ca | %   | 0.00 | 0.00 | 0.01 | 0.02 | 0.00 | 0.00 | 0.00 | 0.00 | 0.00 | 0.00 | 0.07 | 0.16 | 0.31  | 0.34 | 0.03 | 0.07 | 0.04 | 0.11 | 0.00 | 0.00 |      |
| Treated | Rs | 6  | E  | GPa | 1.84 | 0.09 | 1.99 | 0.10 | 2.28 | 0.12 | 2.59 | 0.42 | 5.03 | 0.25 | 1.82 | 0.10 | 6.82  | 0.38 | 3.52 | 0.99 | 2.84 | 0.82 | 3.13 | 0.84 |      |
| Treated | Rs | 6  | Fe | %   | 0.00 | 0.00 | 0.00 | 0.00 | 0.00 | 0.00 | 0.00 | 0.00 | 0.00 | 0.00 | 0.00 | 0.00 | 0.40  | 0.63 | 0.00 | 0.00 | 0.00 | 0.00 | 0.00 | 0.00 |      |
| Treated | Rs | 6  | H  | GPa | 0.22 | 0.01 | 0.24 | 0.01 | 0.26 | 0.02 | 0.32 | 0.03 | 0.53 | 0.04 | 0.24 | 0.02 | 0.94  | 0.07 | 0.46 | 0.13 | 0.36 | 0.11 | 0.31 | 0.11 |      |
| Treated | Rs | 6  | Te | %   | 0.00 | 0.00 | 0.00 | 0.00 | 0.00 | 0.00 | 0.00 | 0.00 | 0.00 | 0.00 | 0.00 | 0.00 | 0.00  | 0.00 | 0.00 | 0.00 | 0.00 | 0.00 | 0.00 | 0.00 |      |
| Treated | Rs | 7  | Ae | %   | 0.00 | 0.00 | 0.09 | 0.15 | 0.00 | 0.00 | 0.00 | 0.00 | 0.13 | 0.12 | 0.25 | 0.12 | 0.69  | 0.36 | 0.00 | 0.00 | 0.00 | 0.00 | 0.00 | 0.00 |      |
| Treated | Rs | 7  | Ca | %   | 0.00 | 0.00 | 0.09 | 0.15 | 0.00 | 0.00 | 0.00 | 0.00 | 0.00 | 0.00 | 0.09 | 0.11 | 0.14  | 0.34 | 0.00 | 0.00 | 0.00 | 0.00 | 0.00 | 0.00 |      |
| Treated | Rs | 7  | E  | GPa | 1.86 | 0.12 | 2.07 | 0.14 | 2.34 | 0.15 | 2.43 | 0.21 | 6.10 | 0.31 | 2.02 | 0.11 | 7.94  | 0.44 | 3.29 | 1.28 | 3.51 | 1.20 | 3.42 | 0.79 |      |
| Treated | Rs | 7  | Fe | %   | 0.00 | 0.00 | 0.00 | 0.00 | 0.00 | 0.00 | 0.00 | 0.00 | 0.13 | 0.12 | 0.16 | 0.05 | 0.55  | 0.41 | 0.00 | 0.00 | 0.00 | 0.00 | 0.00 | 0.00 |      |
| Treated | Rs | 7  | H  | GPa | 0.22 | 0.01 | 0.25 | 0.02 | 0.26 | 0.02 | 0.32 | 0.04 | 0.64 | 0.05 | 0.26 | 0.02 | 0.97  | 0.07 | 0.43 | 0.17 | 0.45 | 0.15 | 0.35 | 0.11 |      |
| Treated | Rs | 7  | Te | %   | 0.00 | 0.00 | 0.00 | 0.00 | 0.00 | 0.00 | 0.00 | 0.00 | 0.00 | 0.00 | 0.00 | 0.00 | 0.00  | 0.00 | 0.00 | 0.00 | 0.00 | 0.00 | 0.00 | 0.00 |      |
| Treated | Rs | 8  | Ae | %   | 0.00 | 0.00 | 0.09 | 0.16 | 0.13 | 0.33 | 0.00 | 0.00 | 0.36 | 0.42 | 0.32 | 0.16 | 2.41  | 0.48 | 0.00 | 0.00 | 0.00 | 0.00 | 0.00 | 0.00 |      |
| Treated | Rs | 8  | Ca | %   | 0.00 | 0.00 | 0.09 | 0.16 | 0.00 | 0.00 | 0.00 | 0.00 | 0.16 | 0.40 | 0.05 | 0.08 | 0.00  | 0.00 | 0.00 | 0.00 | 0.00 | 0.00 | 0.00 | 0.00 |      |
| Treated | Rs | 8  | E  | GPa | 1.94 | 0.18 | 2.08 | 0.17 | 2.37 | 0.17 | 2.47 | 0.27 | 7.05 | 0.36 | 2.52 | 0.14 | 8.62  | 0.48 | 3.69 | 1.77 | 3.52 | 0.80 | 3.52 | 1.06 |      |
| Treated | Rs | 8  | Fe | %   | 0.00 | 0.00 | 0.00 | 0.00 | 0.13 | 0.33 | 0.00 | 0.00 | 0.20 | 0.31 | 0.27 | 0.09 | 2.41  | 0.48 | 0.00 | 0.00 | 0.00 | 0.00 | 0.00 | 0.00 |      |
| Treated | Rs | 8  | H  | GPa | 0.23 | 0.02 | 0.25 | 0.02 | 0.27 | 0.02 | 0.32 | 0.03 | 0.75 | 0.05 | 0.33 | 0.02 | 1.06  | 0.07 | 0.48 | 0.23 | 0.45 | 0.10 | 0.45 | 0.12 |      |
| Treated | Rs | 8  | Te | %   | 0.00 | 0.00 | 0.00 | 0.00 | 0.00 | 0.00 | 0.00 | 0.00 | 0.00 | 0.00 | 0.00 | 0.00 | 0.00  | 0.00 | 0.00 | 0.00 | 0.00 | 0.00 | 0.00 | 0.00 |      |
| Treated | Rs | 9  | Ae | %   | 0.00 | 0.00 | 0.00 | 0.00 | 0.00 | 0.00 | 0.02 | 0.04 | 0.43 | 0.47 | 0.17 | 0.04 | 5.05  | 0.64 | 0.00 | 0.00 | 0.03 | 0.07 | 0.00 | 0.00 |      |
| Treated | Rs | 9  | Ca | %   | 0.00 | 0.00 | 0.00 | 0.00 | 0.00 | 0.00 | 0.00 | 0.00 | 0.30 | 0.41 | 0.00 | 0.00 | 0.00  | 0.00 | 0.00 | 0.00 | 0.03 | 0.07 | 0.00 | 0.00 |      |
| Treated | Rs | 9  | E  | GPa | 1.96 | 0.18 | 2.09 | 0.17 | 2.43 | 0.22 | 2.53 | 0.28 | 7.60 | 0.97 | 2.68 | 0.15 | 10.02 | 0.55 | 3.98 | 1.54 | 3.93 | 0.95 | 3.86 | 0.69 |      |
| Treated | Rs | 9  | Fe | %   | 0.00 | 0.00 | 0.00 | 0.00 | 0.00 | 0.00 | 0.00 | 0.00 | 0.13 | 0.09 | 0.17 | 0.04 | 5.05  | 0.64 | 0.00 | 0.00 | 0.00 | 0.00 | 0.00 | 0.00 |      |
| Treated | Rs | 9  | H  | GPa | 0.23 | 0.02 | 0.25 | 0.02 | 0.27 | 0.03 | 0.31 | 0.05 | 0.87 | 0.05 | 0.35 | 0.02 | 1.23  | 0.09 | 0.52 | 0.20 | 0.51 | 0.12 | 0.51 | 0.09 |      |
| Treated | Rs | 9  | Te | %   | 0.00 | 0.00 | 0.00 | 0.00 | 0.00 | 0.00 | 0.02 | 0.04 | 0.00 | 0.00 | 0.00 | 0.00 | 0.00  | 0.00 | 0.00 | 0.00 | 0.00 | 0.00 | 0.00 | 0.00 |      |
| Treated | Rs | 10 | Ae | %   | 0.00 | 0.00 | 0.00 | 0.00 | 0.00 | 0.00 | 0.07 | 0.16 | 0.09 | 0.14 | 0.18 | 0.06 | 5.48  | 1.31 | 0.00 | 0.00 | 0.00 | 0.00 | 0.00 | 0.00 |      |
| Treated | Rs | 10 | Ca | %   | 0.00 | 0.00 | 0.00 | 0.00 | 0.00 | 0.00 | 0.00 | 0.00 | 0.00 | 0.00 | 0.00 | 0.00 | 0.00  | 0.00 | 0.00 | 0.00 | 0.00 | 0.00 | 0.00 | 0.00 |      |
| Treated | Rs | 10 | E  | GPa | 1.87 | 0.10 | 2.00 | 0.11 | 2.36 | 0.13 | 2.46 | 0.41 | 6.11 | 0.68 | 3.34 | 0.18 | 10.54 | 0.58 | 3.81 | 1.35 | 4.23 | 0.77 | 4.51 | 0.60 |      |
| Treated | Rs | 10 | Fe | %   | 0.00 | 0.00 | 0.00 | 0.00 | 0.00 | 0.00 | 0.07 | 0.16 | 0.09 | 0.14 | 0.18 | 0.06 | 5.48  | 1.31 | 0.00 | 0.00 | 0.00 | 0.00 | 0.00 | 0.00 |      |
| Treated | Rs | 10 | H  | GPa | 0.22 | 0.01 | 0.24 | 0.01 | 0.26 | 0.02 | 0.24 | 0.02 | 0.96 | 0.07 | 0.44 | 0.03 | 1.29  | 0.09 | 0.50 | 0.16 | 0.54 | 0.10 | 0.59 | 0.08 |      |
| Treated | Rs | 10 | Te | %   | 0.00 | 0.00 | 0.00 | 0.00 | 0.00 | 0.00 | 0.00 | 0.00 | 0.00 | 0.00 | 0.00 | 0.00 | 0.00  | 0.00 | 0.00 | 0.00 | 0.00 | 0.00 | 0.00 | 0.00 |      |
| Treated | Rs | 11 | Ae | %   | 0.11 | 0.18 | 0.00 | 0.00 | 0.10 | 0.25 | 0.00 | 0.00 | 0.45 | 0.47 | 0.60 | 0.09 | 6.19  | 1.43 | 0.00 | 0.00 | 0.00 | 0.00 | 0.00 | 0.00 |      |
| Treated | Rs | 11 | Ca | %   | 0.11 | 0.18 | 0.00 | 0.00 | 0.00 | 0.00 | 0.00 | 0.00 | 0.13 | 0.32 | 0.00 | 0.00 | 0.00  | 0.00 | 0.00 | 0.00 | 0.00 | 0.00 | 0.00 | 0.00 |      |
| Treated | Rs | 11 | E  | GPa | 1.89 | 0.12 | 2.07 | 0.10 | 2.42 | 0.17 | 1.96 | 0.19 | 6.11 | 0.41 | 3.86 | 0.21 | 11.69 | 0.65 | 2.81 | 0.76 | 4.35 | 0.60 | 5.31 | 0.52 |      |
| Treated | Rs | 11 | Fe | %   | 0.00 | 0.00 | 0.00 | 0.00 | 0.10 | 0.25 | 0.00 | 0.00 | 0.29 | 0.24 | 0.60 | 0.09 | 6.19  | 1.43 | 0.00 | 0.00 | 0.00 | 0.00 | 0.00 | 0.00 |      |
| Treated | Rs | 11 | H  | GPa | 0.22 | 0.01 | 0.25 | 0.01 | 0.27 | 0.02 | 0.26 | 0.04 | 1.03 | 0.07 | 0.51 | 0.04 | 1.43  | 0.10 | 0.37 | 0.10 | 0.56 | 0.08 | 0.69 | 0.09 |      |
| Treated | Rs | 11 | Te | %   | 0.00 | 0.00 | 0.00 | 0.00 | 0.00 | 0.00 | 0.00 | 0.00 | 0.03 | 0.07 | 0.00 | 0.00 | 0.00  | 0.00 | 0.00 | 0.00 | 0.00 | 0.00 | 0.00 | 0.00 |      |
| Treated | Rs | 12 | Ae | %   | 0.12 | 0.13 | 0.00 | 0.00 | 0.00 | 0.00 | 0.06 | 0.14 | 0.57 | 0.53 | 0.55 | 0.18 | 7.48  | 1.80 | 0.00 | 0.00 | 0.07 | 0.18 | 0.00 | 0.00 |      |
| Treated | Rs | 12 | Ca | %   | 0.09 | 0.15 | 0.00 | 0.00 | 0.00 | 0.00 | 0.00 | 0.00 | 0.48 | 0.53 | 0.00 | 0.00 | 0.00  | 0.00 | 0.00 | 0.00 | 0.07 | 0.18 | 0.00 | 0.00 |      |
| Treated | Rs | 12 | E  | GPa | 1.96 | 0.14 | 2.09 | 0.14 | 2.45 | 0.18 | 2.10 | 0.32 | 5.71 | 0.99 | 4.03 | 0.22 | 12.01 | 0.67 | 2.97 | 0.70 | 4.45 | 0.40 | 5.94 | 0.60 |      |
| Treated | Rs | 12 | Fe | %   | 0.00 | 0.00 | 0.00 | 0.00 | 0.00 | 0.00 | 0.06 | 0.14 | 0.10 | 0.15 | 0.55 | 0.18 | 7.48  | 1.80 | 0.00 | 0.00 | 0.00 | 0.00 | 0.00 | 0.00 |      |
| Treated | Rs | 12 | H  | GPa | 0.23 | 0.02 | 0.25 | 0.02 | 0.27 | 0.02 | 0.25 | 0.02 | 1.08 | 0.08 | 0.53 | 0.04 | 1.47  | 0.10 | 0.39 | 0.09 | 0.57 | 0.05 | 0.78 | 0.09 |      |
| Treated | Rs | 12 | Te | %   | 0.03 | 0.06 | 0.00 | 0.00 | 0.00 | 0.00 | 0.00 | 0.00 | 0.00 | 0.00 | 0.00 | 0.00 | 0.00  | 0.00 | 0.00 | 0.00 | 0.00 | 0.00 | 0.00 | 0.00 |      |
| Treated | Mz | 13 | Ae | %   | 0.16 | 0.28 | 0.04 | 0.08 | 0.00 | 0.00 | 0.00 | 0.00 | 0.03 | 0.05 | 0.15 | 0.04 | 9.61  | 1.82 | 0.00 | 0.00 | 0.11 | 0.26 | 0.25 | 0.28 |      |
| Treated | Mz | 13 | Ca | %   | 0.16 | 0.28 | 0.04 | 0.08 | 0.00 | 0.00 | 0.00 | 0.00 | 0.00 | 0.00 | 0.00 | 0.00 | 0.34  | 0.59 | 0.00 | 0.00 | 0.11 | 0.26 | 0.25 | 0.28 |      |
| Treated | Mz | 13 | E  | GPa | 1.94 | 0.16 | 2.14 | 0.18 | 2.37 | 0.12 | 1.97 | 0.17 | 5.96 | 0.55 | 4.68 | 0.28 | 13.41 | 0.74 | 3.18 | 0.60 | 5.30 | 0.36 | 6.84 | 0.61 |      |
| Treated | Mz | 13 | Fe | %   | 0.00 | 0.00 | 0.00 | 0.00 | 0.00 | 0.00 | 0.00 | 0.00 | 0.03 | 0.05 | 0.15 | 0.04 | 9.27  | 1.72 | 0.00 | 0.00 | 0.00 | 0.00 | 0.00 | 0.00 |      |
| Treated | Mz | 13 | H  | GPa | 0.23 | 0.02 | 0.25 | 0.02 | 0.27 | 0.02 | 0.24 | 0.02 | 1.28 | 0.18 | 0.62 | 0.05 | 1.64  | 0.11 | 0.42 | 0.08 | 0.68 | 0.05 | 0.90 | 0.09 |      |



|         |    |    |    |     |      |      |      |      |      |      |      |      |      |      |       |      |       |      |      |      |      |      |       |      |      |
|---------|----|----|----|-----|------|------|------|------|------|------|------|------|------|------|-------|------|-------|------|------|------|------|------|-------|------|------|
| Treated | Mz | 13 | Te | %   | 0.00 | 0.00 | 0.00 | 0.00 | 0.00 | 0.04 | 0.00 | 0.00 | 0.00 | 0.00 | 0.00  | 0.00 | 0.00  | 0.00 | 0.00 | 0.00 | 0.00 | 0.00 | 0.00  | 0.00 |      |
| Treated | Mz | 14 | Ae | %   | 0.00 | 0.00 | 0.00 | 0.00 | 0.02 | 0.04 | 0.00 | 0.00 | 0.04 | 0.06 | 0.58  | 0.14 | 10.15 | 0.66 | 0.00 | 0.00 | 0.01 | 0.03 | 0.00  | 0.00 |      |
| Treated | Mz | 14 | Ca | %   | 0.00 | 0.00 | 0.00 | 0.00 | 0.00 | 0.00 | 0.00 | 0.00 | 0.00 | 0.00 | 0.00  | 0.00 | 0.73  | 0.00 | 0.00 | 0.00 | 0.00 | 0.00 | 0.00  | 0.00 |      |
| Treated | Mz | 14 | E  | GPa | 1.88 | 0.09 | 2.20 | 0.16 | 2.42 | 0.13 | 1.92 | 0.13 | 6.18 | 0.56 | 5.71  | 0.32 | 14.51 | 0.80 | 3.18 | 0.63 | 6.14 | 0.35 | 7.59  | 0.62 |      |
| Treated | Mz | 14 | Fe | %   | 0.00 | 0.00 | 0.00 | 0.00 | 0.00 | 0.00 | 0.00 | 0.00 | 0.04 | 0.06 | 0.56  | 0.16 | 9.55  | 1.22 | 0.00 | 0.00 | 0.00 | 0.00 | 0.00  | 0.00 |      |
| Treated | Mz | 14 | H  | GPa | 0.22 | 0.01 | 0.26 | 0.02 | 0.27 | 0.02 | 0.24 | 0.02 | 1.61 | 0.11 | 0.75  | 0.05 | 1.78  | 0.12 | 0.42 | 0.08 | 0.79 | 0.04 | 1.02  | 0.11 |      |
| Treated | Mz | 14 | Te | %   | 0.00 | 0.00 | 0.00 | 0.00 | 0.02 | 0.18 | 0.00 | 0.00 | 0.00 | 0.00 | 0.02  | 0.04 | 0.00  | 0.00 | 0.00 | 0.01 | 0.03 | 0.00 | 0.00  | 0.00 |      |
| Treated | Mz | 15 | Ae | %   | 0.00 | 0.00 | 0.00 | 0.00 | 0.28 | 0.24 | 0.08 | 0.09 | 0.07 | 0.10 | 1.14  | 0.50 | 10.49 | 0.93 | 0.00 | 0.00 | 0.03 | 0.08 | 0.16  | 0.22 |      |
| Treated | Mz | 15 | Ca | %   | 0.00 | 0.00 | 0.00 | 0.00 | 0.16 | 0.26 | 0.06 | 0.09 | 0.00 | 0.00 | 0.57  | 0.59 | 0.28  | 0.62 | 0.00 | 0.00 | 0.03 | 0.08 | 0.15  | 0.23 |      |
| Treated | Mz | 15 | E  | GPa | 1.89 | 0.09 | 2.16 | 0.11 | 2.42 | 0.12 | 1.94 | 0.14 | 7.03 | 1.08 | 6.08  | 0.34 | 14.99 | 0.83 | 3.32 | 0.20 | 7.21 | 0.39 | 8.35  | 0.48 |      |
| Treated | Mz | 15 | Fe | %   | 0.00 | 0.00 | 0.00 | 0.00 | 0.00 | 0.00 | 0.00 | 0.00 | 0.07 | 0.10 | 0.54  | 0.09 | 10.21 | 1.26 | 0.00 | 0.00 | 0.00 | 0.00 | 0.00  | 0.00 |      |
| Treated | Mz | 15 | H  | GPa | 0.22 | 0.01 | 0.25 | 0.01 | 0.27 | 0.02 | 0.32 | 0.02 | 1.83 | 0.13 | 0.80  | 0.06 | 1.83  | 0.13 | 0.43 | 0.04 | 0.93 | 0.05 | 1.16  | 0.08 |      |
| Treated | Mz | 15 | Te | %   | 0.00 | 0.00 | 0.00 | 0.00 | 0.12 | 0.00 | 0.02 | 0.04 | 0.00 | 0.00 | 0.02  | 0.06 | 0.00  | 0.00 | 0.00 | 0.00 | 0.00 | 0.00 | 0.00  | 0.02 | 0.04 |
| Treated | Mz | 16 | Ae | %   | 0.07 | 0.12 | 0.00 | 0.00 | 0.00 | 0.00 | 0.00 | 0.00 | 0.44 | 0.30 | 2.26  | 0.44 | 13.37 | 3.14 | 0.09 | 0.22 | 0.14 | 0.23 | 0.03  | 0.07 |      |
| Treated | Mz | 16 | Ca | %   | 0.00 | 0.00 | 0.00 | 0.00 | 0.00 | 0.00 | 0.00 | 0.00 | 0.00 | 0.00 | 1.39  | 0.39 | 0.00  | 0.00 | 0.09 | 0.22 | 0.14 | 0.23 | 0.03  | 0.07 |      |
| Treated | Mz | 16 | E  | GPa | 2.58 | 0.13 | 2.86 | 0.14 | 3.18 | 0.17 | 2.57 | 0.18 | 6.28 | 1.09 | 7.00  | 0.39 | 16.66 | 0.92 | 3.52 | 0.19 | 7.64 | 0.41 | 8.86  | 0.55 |      |
| Treated | Mz | 16 | Fe | %   | 0.07 | 0.12 | 0.00 | 0.00 | 0.00 | 0.00 | 0.00 | 0.00 | 0.44 | 0.30 | 0.86  | 0.24 | 13.37 | 3.14 | 0.00 | 0.00 | 0.00 | 0.00 | 0.00  | 0.00 |      |
| Treated | Mz | 16 | H  | GPa | 0.30 | 0.02 | 0.34 | 0.02 | 0.35 | 0.03 | 0.43 | 0.03 | 1.86 | 0.14 | 0.92  | 0.06 | 2.04  | 0.14 | 0.46 | 0.03 | 0.98 | 0.05 | 1.23  | 0.09 |      |
| Treated | Mz | 16 | Te | %   | 0.00 | 0.00 | 0.00 | 0.00 | 0.00 | 0.00 | 0.00 | 0.00 | 0.00 | 0.00 | 0.01  | 0.01 | 0.00  | 0.00 | 0.00 | 0.00 | 0.00 | 0.00 | 0.00  | 0.00 |      |
| Treated | Mz | 17 | Ae | %   | 0.00 | 0.00 | 0.05 | 0.09 | 0.00 | 0.00 | 0.01 | 0.03 | 0.27 | 0.29 | 0.64  | 0.53 | 12.35 | 1.55 | 0.00 | 0.00 | 0.02 | 0.05 | 0.00  | 0.00 |      |
| Treated | Mz | 17 | Ca | %   | 0.00 | 0.00 | 0.00 | 0.00 | 0.00 | 0.00 | 0.00 | 0.00 | 0.00 | 0.00 | 0.07  | 0.11 | 0.00  | 0.00 | 0.00 | 0.00 | 0.02 | 0.05 | 0.00  | 0.00 |      |
| Treated | Mz | 17 | E  | GPa | 2.50 | 0.13 | 3.79 | 0.19 | 3.21 | 0.16 | 3.41 | 0.24 | 5.78 | 0.52 | 7.78  | 0.43 | 17.73 | 1.07 | 3.92 | 0.52 | 8.05 | 0.44 | 9.14  | 0.51 |      |
| Treated | Mz | 17 | Fe | %   | 0.00 | 0.00 | 0.00 | 0.00 | 0.00 | 0.00 | 0.01 | 0.03 | 0.27 | 0.29 | 0.57  | 0.49 | 12.35 | 1.55 | 0.00 | 0.00 | 0.00 | 0.00 | 0.00  | 0.00 |      |
| Treated | Mz | 17 | H  | GPa | 0.29 | 0.01 | 0.45 | 0.02 | 0.36 | 0.03 | 0.53 | 0.04 | 1.93 | 0.13 | 1.02  | 0.07 | 2.14  | 0.16 | 0.51 | 0.07 | 1.04 | 0.06 | 1.27  | 0.09 |      |
| Treated | Mz | 17 | Te | %   | 0.00 | 0.00 | 0.05 | 0.09 | 0.00 | 0.00 | 0.00 | 0.00 | 0.00 | 0.00 | 0.00  | 0.00 | 0.00  | 0.00 | 0.00 | 0.00 | 0.00 | 0.00 | 0.00  | 0.00 |      |
| Treated | Mz | 18 | Ae | %   | 0.00 | 0.00 | 0.00 | 0.00 | 0.00 | 0.00 | 0.00 | 0.00 | 0.05 | 0.05 | 0.59  | 0.23 | 14.74 | 1.87 | 0.00 | 0.00 | 0.11 | 0.14 | 0.00  | 0.00 |      |
| Treated | Mz | 18 | Ca | %   | 0.00 | 0.00 | 0.00 | 0.00 | 0.00 | 0.00 | 0.00 | 0.00 | 0.00 | 0.00 | 0.00  | 0.00 | 0.00  | 0.00 | 0.00 | 0.00 | 0.11 | 0.14 | 0.00  | 0.00 |      |
| Treated | Mz | 18 | E  | GPa | 3.44 | 0.17 | 4.57 | 0.23 | 4.26 | 0.21 | 4.27 | 0.30 | 6.79 | 0.42 | 8.56  | 0.47 | 18.19 | 1.01 | 4.10 | 0.53 | 8.47 | 0.46 | 9.57  | 0.53 |      |
| Treated | Mz | 18 | Fe | %   | 0.00 | 0.00 | 0.00 | 0.00 | 0.00 | 0.00 | 0.00 | 0.00 | 0.03 | 0.05 | 0.59  | 0.23 | 14.74 | 1.87 | 0.00 | 0.00 | 0.00 | 0.00 | 0.00  | 0.00 |      |
| Treated | Mz | 18 | H  | GPa | 0.40 | 0.02 | 0.54 | 0.03 | 0.48 | 0.03 | 0.64 | 0.04 | 1.95 | 0.14 | 1.12  | 0.08 | 2.23  | 0.16 | 0.54 | 0.07 | 1.09 | 0.06 | 1.33  | 0.09 |      |
| Treated | Mz | 18 | Te | %   | 0.00 | 0.00 | 0.00 | 0.00 | 0.00 | 0.34 | 0.00 | 0.00 | 0.02 | 0.00 | 0.00  | 0.00 | 0.00  | 0.00 | 0.00 | 0.00 | 0.00 | 0.00 | 0.00  | 0.00 |      |
| Treated | Mz | 19 | Ae | %   | 0.00 | 0.00 | 0.00 | 0.00 | 0.14 | 0.34 | 0.00 | 0.00 | 0.21 | 0.33 | 0.78  | 0.74 | 12.19 | 1.56 | 0.00 | 0.00 | 0.00 | 0.00 | 0.00  | 0.00 |      |
| Treated | Mz | 19 | Ca | %   | 0.00 | 0.00 | 0.00 | 0.00 | 0.00 | 0.00 | 0.00 | 0.00 | 0.00 | 0.00 | 0.00  | 0.00 | 0.00  | 0.00 | 0.00 | 0.00 | 0.00 | 0.00 | 0.00  | 0.00 |      |
| Treated | Mz | 19 | E  | GPa | 3.89 | 0.20 | 5.48 | 0.27 | 5.01 | 0.25 | 5.14 | 0.36 | 7.14 | 0.60 | 9.22  | 0.51 | 18.75 | 1.04 | 4.04 | 0.22 | 8.89 | 0.48 | 10.01 | 0.56 |      |
| Treated | Mz | 19 | Fe | %   | 0.00 | 0.00 | 0.00 | 0.00 | 0.00 | 0.00 | 0.00 | 0.00 | 0.21 | 0.33 | 0.78  | 0.74 | 12.19 | 1.56 | 0.00 | 0.00 | 0.00 | 0.00 | 0.00  | 0.00 |      |
| Treated | Mz | 19 | H  | GPa | 0.46 | 0.02 | 0.65 | 0.03 | 0.56 | 0.04 | 0.73 | 0.05 | 2.09 | 0.15 | 1.21  | 0.08 | 2.29  | 0.16 | 0.53 | 0.04 | 1.14 | 0.06 | 1.39  | 0.10 |      |
| Treated | Mz | 19 | Te | %   | 0.00 | 0.00 | 0.00 | 0.00 | 0.14 | 0.00 | 0.00 | 0.00 | 0.00 | 0.04 | 0.00  | 0.00 | 0.00  | 0.00 | 0.00 | 0.00 | 0.00 | 0.00 | 0.00  | 0.00 |      |
| Treated | Mz | 20 | Ae | %   | 0.00 | 0.00 | 0.06 | 0.11 | 0.00 | 0.00 | 0.00 | 0.00 | 0.33 | 0.49 | 1.06  | 0.33 | 11.35 | 1.92 | 0.14 | 0.15 | 0.00 | 0.00 | 0.05  | 0.08 |      |
| Treated | Mz | 20 | Ca | %   | 0.00 | 0.00 | 0.06 | 0.11 | 0.00 | 0.00 | 0.00 | 0.00 | 0.14 | 0.34 | 0.00  | 0.00 | 0.00  | 0.00 | 0.14 | 0.15 | 0.00 | 0.00 | 0.05  | 0.08 |      |
| Treated | Mz | 20 | E  | GPa | 4.31 | 0.22 | 6.48 | 0.32 | 4.94 | 0.61 | 5.85 | 0.41 | 7.40 | 0.66 | 9.61  | 0.53 | 19.30 | 1.07 | 4.22 | 0.23 | 7.21 | 0.73 | 10.45 | 0.58 |      |
| Treated | Mz | 20 | Fe | %   | 0.00 | 0.00 | 0.00 | 0.00 | 0.00 | 0.00 | 0.00 | 0.00 | 0.03 | 0.05 | 1.06  | 0.33 | 11.35 | 1.92 | 0.00 | 0.00 | 0.00 | 0.00 | 0.00  | 0.00 |      |
| Treated | Mz | 20 | H  | GPa | 0.51 | 0.03 | 0.76 | 0.04 | 0.55 | 0.06 | 0.75 | 0.05 | 2.08 | 0.15 | 1.26  | 0.09 | 2.36  | 0.17 | 0.55 | 0.04 | 1.20 | 0.07 | 1.46  | 0.10 |      |
| Treated | Mz | 20 | Te | %   | 0.00 | 0.00 | 0.00 | 0.00 | 0.00 | 0.00 | 0.00 | 0.00 | 0.16 | 0.00 | 0.00  | 0.00 | 0.00  | 0.00 | 0.00 | 0.00 | 0.00 | 0.00 | 0.00  | 0.00 |      |
| Treated | Mz | 21 | Ae | %   | 0.00 | 0.00 | 0.00 | 0.00 | 0.00 | 0.00 | 0.02 | 0.04 | 0.19 | 0.15 | 1.23  | 0.19 | 14.57 | 1.63 | 0.00 | 0.00 | 0.00 | 0.00 | 0.00  | 0.00 |      |
| Treated | Mz | 21 | Ca | %   | 0.00 | 0.00 | 0.00 | 0.00 | 0.00 | 0.00 | 0.00 | 0.00 | 0.00 | 0.00 | 0.00  | 0.00 | 0.00  | 0.00 | 0.00 | 0.00 | 0.00 | 0.00 | 0.00  | 0.00 |      |
| Treated | Mz | 21 | E  | GPa | 4.64 | 0.23 | 6.41 | 0.32 | 4.65 | 0.23 | 5.98 | 0.44 | 7.67 | 0.83 | 10.48 | 0.58 | 20.68 | 1.15 | 4.40 | 0.24 | 7.42 | 0.81 | 8.43  | 0.47 |      |
| Treated | Mz | 21 | Fe | %   | 0.00 | 0.00 | 0.00 | 0.00 | 0.00 | 0.00 | 0.02 | 0.04 | 0.19 | 0.15 | 1.23  | 0.19 | 14.57 | 1.63 | 0.00 | 0.00 | 0.00 | 0.00 | 0.00  | 0.00 |      |
| Treated | Mz | 21 | H  | GPa | 0.55 | 0.03 | 0.75 | 0.04 | 0.52 | 0.04 | 0.87 | 0.06 | 2.09 | 0.15 | 1.38  | 0.10 | 2.53  | 0.18 | 0.58 | 0.04 | 1.26 | 0.07 | 1.17  | 0.08 |      |
| Treated | Mz | 21 | Te | %   | 0.00 | 0.00 | 0.00 | 0.00 | 0.00 | 0.00 | 0.00 | 0.00 | 0.00 | 0.00 | 0.31  | 0.00 | 0.00  | 0.00 | 0.00 | 0.00 | 0.00 | 0.00 | 0.00  | 0.00 |      |
| Treated | Mz | 22 | Ae | %   | 0.00 | 0.00 | 0.00 | 0.00 | 0.00 | 0.00 | 0.24 | 0.34 | 0.21 | 0.07 | 2.57  | 1.50 | 14.65 | 1.64 | 0.00 | 0.00 | 0.06 | 0.10 | 0.00  | 0.00 |      |
| Treated | Mz | 22 | Ca | %   | 0.00 | 0.00 | 0.00 | 0.00 | 0.00 | 0.00 | 0.17 | 0.27 | 0.00 | 0.00 | 0.00  | 0.00 | 0.00  | 0.00 | 0.00 | 0.00 | 0.00 | 0.00 | 0.00  | 0.00 |      |
| Treated | Mz | 22 | E  | GPa | 5.18 | 0.37 | 7.66 | 0.38 | 5.01 | 0.25 | 6.93 | 0.49 | 7.15 | 0.35 | 11.25 | 0.48 | 21.07 | 1.17 | 4.61 | 0.24 | 7.04 | 0.53 | 8.79  | 0.49 |      |
| Treated | Mz | 22 | Fe | %   | 0.00 | 0.00 | 0.00 | 0.00 | 0.00 | 0.00 | 0.00 | 0.00 | 0.21 | 0.07 | 2.57  | 1.50 | 14.65 | 1.64 | 0.00 | 0.00 | 0.06 | 0.10 | 0.00  | 0.00 |      |
| Treated | Mz | 22 | H  | GPa | 0.61 | 0.04 | 0.90 | 0.05 | 0.56 | 0.04 | 0.98 | 0.07 | 2.16 | 0.15 | 1.45  | 0.11 | 2.58  | 0.18 | 0.60 | 0.04 | 1.31 | 0.07 | 1.22  | 0.09 |      |



|         |    |    |    |     |      |      |       |      |      |      |       |      |       |      |       |      |       |      |      |      |      |      |      |      |
|---------|----|----|----|-----|------|------|-------|------|------|------|-------|------|-------|------|-------|------|-------|------|------|------|------|------|------|------|
| Treated | Wz | 31 | Te | %   | 0.00 | 0.00 | 0.00  | 0.00 | 0.00 | 0.00 | 0.00  | 0.00 | 0.13  | 0.00 | 0.00  | 0.00 | 0.00  | 0.00 | 0.00 | 0.00 | 0.00 | 0.00 | 0.00 | 0.00 |
| Treated | Wz | 32 | Ae | %   | 0.00 | 0.00 | 0.00  | 0.00 | 0.00 | 0.00 | 0.00  | 0.00 | 0.58  | 0.20 | 10.83 | 2.42 | 28.32 | 4.03 | 0.00 | 0.00 | 0.00 | 0.00 | 0.22 | 0.12 |
| Treated | Wz | 32 | Ca | %   | 0.00 | 0.00 | 0.00  | 0.00 | 0.00 | 0.00 | 0.00  | 0.00 | 0.00  | 0.00 | 1.10  | 1.10 | 0.00  | 0.00 | 0.00 | 0.00 | 0.00 | 0.00 | 0.22 | 0.12 |
| Treated | Wz | 32 | E  | GPa | 8.34 | 0.42 | 12.64 | 0.63 | 8.67 | 0.44 | 12.79 | 0.89 | 10.73 | 1.69 | 10.72 | 0.46 | 30.55 | 1.84 | 4.90 | 0.27 | 8.47 | 1.02 | 9.80 | 0.54 |
| Treated | Wz | 32 | Fe | %   | 0.00 | 0.00 | 0.00  | 0.00 | 0.00 | 0.00 | 0.00  | 0.00 | 0.56  | 0.18 | 9.73  | 1.87 | 28.32 | 4.03 | 0.00 | 0.00 | 0.00 | 0.00 | 0.00 | 0.00 |
| Treated | Wz | 32 | H  | GPa | 0.98 | 0.05 | 1.49  | 0.07 | 0.97 | 0.07 | 1.54  | 0.09 | 1.57  | 0.11 | 1.39  | 0.11 | 4.05  | 0.28 | 0.61 | 0.04 | 1.11 | 0.07 | 1.36 | 0.10 |
| Treated | Wz | 32 | Te | %   | 0.00 | 0.00 | 0.00  | 0.00 | 0.00 | 0.00 | 0.00  | 0.00 | 0.02  | 0.33 | 0.00  | 0.00 | 0.00  | 0.00 | 0.00 | 0.00 | 0.00 | 0.00 | 0.00 | 0.00 |
| Treated | Wz | 33 | Ae | %   | 0.00 | 0.00 | 0.00  | 0.00 | 0.00 | 0.00 | 0.00  | 0.00 | 0.71  | 0.28 | 10.72 | 1.90 | 27.65 | 4.17 | 0.00 | 0.00 | 0.00 | 0.00 | 0.08 | 0.13 |
| Treated | Wz | 33 | Ca | %   | 0.00 | 0.00 | 0.00  | 0.00 | 0.00 | 0.00 | 0.00  | 0.00 | 0.00  | 0.00 | 0.75  | 0.88 | 0.00  | 0.00 | 0.00 | 0.00 | 0.00 | 0.00 | 0.08 | 0.13 |
| Treated | Wz | 33 | E  | GPa | 8.97 | 0.18 | 13.16 | 0.66 | 9.48 | 0.55 | 12.81 | 0.73 | 9.35  | 0.99 | 10.36 | 0.68 | 28.13 | 2.11 | 4.52 | 0.25 | 8.81 | 0.88 | 9.58 | 0.53 |
| Treated | Wz | 33 | Fe | %   | 0.00 | 0.00 | 0.00  | 0.00 | 0.00 | 0.00 | 0.00  | 0.00 | 0.71  | 0.28 | 9.97  | 1.55 | 27.65 | 4.17 | 0.00 | 0.00 | 0.00 | 0.00 | 0.00 | 0.00 |
| Treated | Wz | 33 | H  | GPa | 1.03 | 0.05 | 1.55  | 0.08 | 1.02 | 0.07 | 1.54  | 0.09 | 1.49  | 0.10 | 1.33  | 0.09 | 3.66  | 0.26 | 0.55 | 0.03 | 1.11 | 0.06 | 1.33 | 0.09 |
| Treated | Wz | 33 | Te | %   | 0.00 | 0.00 | 0.00  | 0.00 | 0.00 | 0.00 | 0.00  | 0.00 | 0.00  | 0.04 | 0.00  | 0.00 | 0.00  | 0.00 | 0.00 | 0.00 | 0.00 | 0.00 | 0.00 | 0.00 |
| Treated | Wz | 34 | Ae | %   | 0.17 | 0.29 | 0.00  | 0.00 | 0.00 | 0.00 | 0.00  | 0.00 | 0.24  | 0.13 | 8.14  | 1.13 | 28.65 | 3.11 | 0.00 | 0.00 | 0.00 | 0.00 | 0.00 | 0.00 |
| Treated | Wz | 34 | Ca | %   | 0.00 | 0.00 | 0.00  | 0.00 | 0.00 | 0.00 | 0.00  | 0.00 | 0.00  | 0.00 | 0.58  | 0.64 | 0.00  | 0.00 | 0.00 | 0.00 | 0.00 | 0.00 | 0.00 | 0.00 |
| Treated | Wz | 34 | E  | GPa | 8.86 | 0.26 | 13.13 | 0.66 | 9.36 | 0.50 | 12.79 | 0.73 | 10.19 | 1.07 | 10.67 | 0.59 | 30.77 | 1.85 | 5.25 | 0.25 | 9.44 | 0.55 | 9.75 | 0.54 |
| Treated | Wz | 34 | Fe | %   | 0.15 | 0.26 | 0.00  | 0.00 | 0.00 | 0.00 | 0.00  | 0.00 | 0.24  | 0.13 | 7.56  | 0.95 | 28.65 | 3.11 | 0.00 | 0.00 | 0.00 | 0.00 | 0.00 | 0.00 |
| Treated | Wz | 34 | H  | GPa | 0.99 | 0.05 | 1.55  | 0.08 | 0.98 | 0.08 | 1.51  | 0.08 | 1.62  | 0.11 | 1.40  | 0.10 | 4.08  | 0.28 | 0.60 | 0.04 | 1.13 | 0.07 | 1.25 | 0.07 |
| Treated | Wz | 34 | Te | %   | 0.02 | 0.03 | 0.00  | 0.00 | 0.00 | 0.00 | 0.00  | 0.00 | 0.00  | 0.00 | 0.00  | 0.00 | 0.00  | 0.00 | 0.00 | 0.00 | 0.00 | 0.00 | 0.00 | 0.00 |
| Treated | Wz | 35 | Ae | %   | 0.04 | 0.08 | 0.00  | 0.00 | 0.00 | 0.00 | 0.00  | 0.00 | 0.08  | 0.07 | 10.31 | 1.72 | 28.31 | 4.03 | 0.00 | 0.00 | 0.00 | 0.00 | 0.07 | 0.11 |
| Treated | Wz | 35 | Ca | %   | 0.00 | 0.00 | 0.00  | 0.00 | 0.00 | 0.00 | 0.00  | 0.00 | 0.00  | 0.00 | 0.61  | 0.67 | 0.00  | 0.00 | 0.00 | 0.00 | 0.00 | 0.00 | 0.07 | 0.11 |
| Treated | Wz | 35 | E  | GPa | 9.13 | 0.31 | 13.67 | 0.46 | 9.41 | 0.41 | 12.75 | 0.56 | 10.04 | 0.64 | 10.53 | 0.69 | 30.09 | 2.14 | 5.54 | 0.27 | 9.50 | 0.51 | 9.76 | 0.54 |
| Treated | Wz | 35 | Fe | %   | 0.04 | 0.08 | 0.00  | 0.00 | 0.00 | 0.00 | 0.00  | 0.00 | 0.08  | 0.07 | 9.71  | 1.55 | 28.31 | 4.03 | 0.00 | 0.00 | 0.00 | 0.00 | 0.00 | 0.00 |
| Treated | Wz | 35 | H  | GPa | 0.99 | 0.05 | 1.54  | 0.07 | 0.99 | 0.06 | 1.50  | 0.08 | 1.58  | 0.11 | 1.35  | 0.09 | 3.73  | 0.26 | 0.64 | 0.04 | 1.14 | 0.06 | 1.26 | 0.07 |
| Treated | Wz | 35 | Te | %   | 0.00 | 0.00 | 0.00  | 0.00 | 0.00 | 0.00 | 0.00  | 0.00 | 0.00  | 0.00 | 0.00  | 0.00 | 0.00  | 0.00 | 0.00 | 0.00 | 0.00 | 0.00 | 0.00 | 0.00 |
| Treated | Wz | 36 | Ae | %   | 0.52 | 0.11 | 0.37  | 0.32 | 0.00 | 0.00 | 0.00  | 0.00 | 0.10  | 0.08 | 6.03  | 2.25 | 28.99 | 3.43 | 0.00 | 0.00 | 0.07 | 0.11 | 0.00 | 0.00 |
| Treated | Wz | 36 | Ca | %   | 0.52 | 0.11 | 0.37  | 0.32 | 0.00 | 0.00 | 0.00  | 0.00 | 0.00  | 0.00 | 0.41  | 0.59 | 0.00  | 0.00 | 0.00 | 0.00 | 0.07 | 0.11 | 0.00 | 0.00 |
| Treated | Wz | 36 | E  | GPa | 9.06 | 0.43 | 13.35 | 0.35 | 9.34 | 0.47 | 12.77 | 0.44 | 9.88  | 0.65 | 10.63 | 0.59 | 32.87 | 1.89 | 5.39 | 1.00 | 9.61 | 0.52 | 9.20 | 0.51 |
| Treated | Wz | 36 | Fe | %   | 0.00 | 0.00 | 0.00  | 0.00 | 0.00 | 0.00 | 0.00  | 0.00 | 0.10  | 0.08 | 5.62  | 2.47 | 28.99 | 3.43 | 0.00 | 0.00 | 0.00 | 0.00 | 0.00 | 0.00 |
| Treated | Wz | 36 | H  | GPa | 0.98 | 0.07 | 1.41  | 0.06 | 0.99 | 0.07 | 1.51  | 0.09 | 1.56  | 0.11 | 1.39  | 0.10 | 4.16  | 0.29 | 0.67 | 0.04 | 1.15 | 0.06 | 1.18 | 0.07 |
| Treated | Wz | 36 | Te | %   | 0.00 | 0.00 | 0.00  | 0.00 | 0.00 | 0.00 | 0.00  | 0.00 | 0.00  | 0.00 | 0.00  | 0.00 | 0.00  | 0.00 | 0.00 | 0.00 | 0.00 | 0.00 | 0.00 | 0.00 |
| Treated | Wz | 37 | Ae | %   | 0.24 | 0.26 | 0.50  | 0.46 | 0.00 | 0.00 | 0.00  | 0.00 | 0.14  | 0.04 | 7.07  | 0.73 | 28.21 | 2.49 | 0.04 | 0.10 | 0.35 | 0.62 | 0.00 | 0.00 |
| Treated | Wz | 37 | Ca | %   | 0.17 | 0.30 | 0.50  | 0.46 | 0.00 | 0.00 | 0.00  | 0.00 | 0.00  | 0.00 | 0.07  | 0.16 | 0.00  | 0.00 | 0.00 | 0.00 | 0.35 | 0.62 | 0.00 | 0.00 |
| Treated | Wz | 37 | E  | GPa | 9.67 | 0.19 | 12.62 | 0.54 | 9.67 | 0.49 | 12.90 | 0.44 | 9.88  | 0.65 | 11.16 | 0.62 | 29.29 | 2.83 | 5.63 | 0.21 | 9.72 | 0.52 | 9.40 | 0.52 |
| Treated | Wz | 37 | Fe | %   | 0.00 | 0.00 | 0.00  | 0.00 | 0.00 | 0.00 | 0.00  | 0.00 | 0.13  | 0.02 | 7.00  | 0.81 | 28.21 | 2.49 | 0.00 | 0.00 | 0.00 | 0.00 | 0.00 | 0.00 |
| Treated | Wz | 37 | H  | GPa | 1.09 | 0.05 | 1.49  | 0.08 | 1.02 | 0.07 | 1.59  | 0.09 | 1.56  | 0.11 | 1.46  | 0.10 | 3.76  | 0.26 | 0.57 | 0.04 | 1.17 | 0.06 | 1.21 | 0.07 |
| Treated | Wz | 37 | Te | %   | 0.07 | 0.12 | 0.00  | 0.00 | 0.00 | 0.00 | 0.00  | 0.00 | 0.01  | 0.00 | 0.00  | 0.00 | 0.00  | 0.00 | 0.04 | 0.10 | 0.00 | 0.00 | 0.00 | 0.00 |
| Treated | Wz | 38 | Ae | %   | 0.66 | 0.69 | 0.00  | 0.00 | 0.00 | 0.00 | 0.00  | 0.00 | 0.27  | 0.47 | 7.36  | 1.73 | 27.25 | 3.10 | 0.02 | 0.05 | 0.00 | 0.00 | 0.00 | 0.00 |
| Treated | Wz | 38 | Ca | %   | 0.25 | 0.03 | 0.00  | 0.00 | 0.00 | 0.00 | 0.00  | 0.00 | 0.18  | 0.44 | 0.00  | 0.00 | 0.00  | 0.00 | 0.00 | 0.00 | 0.00 | 0.00 | 0.00 | 0.00 |
| Treated | Wz | 38 | E  | GPa | 9.01 | 0.23 | 13.57 | 0.68 | 9.79 | 0.49 | 13.25 | 0.75 | 10.78 | 0.46 | 11.38 | 0.63 | 28.03 | 1.81 | 5.63 | 0.27 | 9.83 | 0.53 | 9.79 | 0.54 |
| Treated | Wz | 38 | Fe | %   | 0.35 | 0.60 | 0.00  | 0.00 | 0.00 | 0.00 | 0.00  | 0.00 | 0.09  | 0.07 | 7.33  | 1.74 | 27.25 | 3.10 | 0.00 | 0.00 | 0.00 | 0.00 | 0.00 | 0.00 |
| Treated | Wz | 38 | H  | GPa | 1.03 | 0.05 | 1.60  | 0.08 | 1.04 | 0.07 | 1.57  | 0.09 | 1.57  | 0.11 | 1.49  | 0.10 | 3.83  | 0.28 | 0.64 | 0.05 | 1.18 | 0.06 | 1.26 | 0.07 |
| Treated | Wz | 38 | Te | %   | 0.07 | 0.12 | 0.00  | 0.00 | 0.00 | 0.00 | 0.00  | 0.00 | 0.00  | 0.03 | 0.03  | 0.07 | 0.00  | 0.00 | 0.02 | 0.05 | 0.00 | 0.00 | 0.00 | 0.00 |
| Treated | Wz | 39 | Ae | %   | 0.00 | 0.00 | 0.00  | 0.00 | 0.00 | 0.00 | 0.00  | 0.00 | 0.66  | 0.94 | 7.25  | 1.20 | 32.08 | 2.77 | 0.26 | 0.36 | 0.15 | 0.24 | 0.00 | 0.00 |
| Treated | Wz | 39 | Ca | %   | 0.00 | 0.00 | 0.00  | 0.00 | 0.00 | 0.00 | 0.00  | 0.00 | 0.54  | 0.89 | 0.00  | 0.00 | 0.03  | 0.07 | 0.26 | 0.36 | 0.00 | 0.00 | 0.00 | 0.00 |
| Treated | Wz | 39 | E  | GPa | 9.16 | 0.27 | 13.35 | 0.67 | 9.93 | 0.50 | 12.80 | 0.49 | 9.76  | 0.63 | 11.76 | 0.65 | 28.77 | 1.55 | 5.12 | 0.85 | 9.95 | 0.54 | 9.51 | 0.53 |
| Treated | Wz | 39 | Fe | %   | 0.00 | 0.00 | 0.00  | 0.00 | 0.00 | 0.00 | 0.00  | 0.00 | 0.12  | 0.10 | 7.25  | 1.20 | 32.04 | 2.70 | 0.00 | 0.00 | 0.15 | 0.24 | 0.00 | 0.00 |
| Treated | Wz | 39 | H  | GPa | 1.04 | 0.05 | 1.57  | 0.08 | 1.05 | 0.07 | 1.54  | 0.05 | 1.70  | 0.12 | 1.54  | 0.11 | 3.95  | 0.28 | 0.71 | 0.05 | 1.19 | 0.06 | 1.21 | 0.07 |
| Treated | Wz | 39 | Te | %   | 0.00 | 0.00 | 0.00  | 0.00 | 0.00 | 0.00 | 0.00  | 0.00 | 0.00  | 0.00 | 0.00  | 0.00 | 0.01  | 0.03 | 0.00 | 0.00 | 0.00 | 0.00 | 0.00 | 0.00 |

**Supplementary Table 12.** Gain or loss from one tooth row (Tr) to the adjacent tooth row for each tooth part (P), given in %, (the highest values for each parameter was set as 100%) for E, H, Fe, Ca, Ae (all elements), and Te (all elements without Ca and Fe) are shown.

| Condition | P                       | Tr | Gain or loss of, % |         |        |        |       |        |
|-----------|-------------------------|----|--------------------|---------|--------|--------|-------|--------|
|           |                         |    | E, %               | Fe, %   | Ca,    | Ae     | H     | A-CaFe |
| Native    | Central tooth Cusp      | 1  | 0.62               | 0.00    | 0.00   | 0.00   | 0.67  | 0.00   |
| Native    | Central tooth Stylus    | 1  | 0.67               | 0.00    | 4.48   | 4.48   | 0.68  | 0.00   |
| Native    | Lateral tooth I Cusp    | 1  | 0.69               | 0.00    | 0.00   | 0.00   | 0.69  | 0.00   |
| Native    | Lateral tooth I Stylus  | 1  | 0.23               | 0.00    | 0.00   | 0.00   | 0.25  | 0.00   |
| Native    | Lateral tooth II Basis  | 1  | 0.61               | 0.00    | 0.00   | 0.00   | 0.60  | 0.00   |
| Native    | Lateral tooth II Cusp   | 1  | 3.31               | 0.00    | 0.00   | 0.05   | 3.31  | 0.54   |
| Native    | Lateral tooth II Stylus | 1  | 0.60               | 0.13    | 0.00   | -1.61  | 0.60  | -15.56 |
| Native    | Marginal tooth Basis    | 1  | 1.93               | 0.00    | 0.00   | 2.56   | 1.97  | 7.04   |
| Native    | Marginal tooth Cusp     | 1  | -0.69              | -100.00 | 0.00   | -28.36 | -0.71 | 0.00   |
| Native    | Marginal tooth Stylus   | 1  | 1.04               | 0.00    | 0.00   | 0.00   | 1.06  | 0.00   |
| Native    | Central tooth Cusp      | 2  | -0.11              | 0.00    | 1.29   | 1.29   | -0.14 | 0.00   |
| Native    | Central tooth Stylus    | 2  | 0.45               | 0.00    | -4.48  | -4.48  | 0.45  | 0.00   |
| Native    | Lateral tooth I Cusp    | 2  | -0.92              | 0.00    | 0.00   | 0.00   | -0.95 | 0.00   |
| Native    | Lateral tooth I Stylus  | 2  | -0.53              | 0.00    | 0.00   | 0.00   | -0.57 | 0.00   |
| Native    | Lateral tooth II Basis  | 2  | 5.74               | 0.00    | 0.00   | 0.00   | 5.33  | 0.00   |
| Native    | Lateral tooth II Cusp   | 2  | 3.31               | 0.00    | 5.98   | 1.90   | 3.32  | 2.16   |
| Native    | Lateral tooth II Stylus | 2  | 0.09               | -0.13   | 0.00   | 1.45   | 0.12  | 14.07  |
| Native    | Marginal tooth Basis    | 2  | 0.84               | 0.00    | 0.00   | 3.08   | 1.40  | 8.45   |
| Native    | Marginal tooth Cusp     | 2  | 1.77               | 0.00    | 0.00   | 0.00   | 1.79  | 0.00   |
| Native    | Marginal tooth Stylus   | 2  | 0.80               | 100.00  | 0.00   | 11.48  | 0.80  | 0.00   |
| Native    | Central tooth Cusp      | 3  | 0.45               | 0.00    | -1.29  | -1.29  | 0.46  | 0.00   |
| Native    | Central tooth Stylus    | 3  | 0.07               | 0.00    | 0.00   | 0.00   | 0.07  | 0.00   |
| Native    | Lateral tooth I Cusp    | 3  | 0.74               | 0.00    | 16.84  | 16.84  | 0.79  | 0.00   |
| Native    | Lateral tooth I Stylus  | 3  | 0.31               | 0.00    | 0.00   | 0.00   | 0.32  | 0.00   |
| Native    | Lateral tooth II Basis  | 3  | 4.08               | 0.00    | 51.81  | 40.32  | 4.01  | 0.00   |
| Native    | Lateral tooth II Cusp   | 3  | 2.28               | 0.00    | -3.93  | -1.16  | 2.26  | -0.54  |
| Native    | Lateral tooth II Stylus | 3  | 0.32               | 0.00    | 4.71   | 0.88   | 0.30  | -14.07 |
| Native    | Marginal tooth Basis    | 3  | 6.74               | 0.00    | 0.00   | -8.72  | 6.25  | -23.94 |
| Native    | Marginal tooth Cusp     | 3  | -0.52              | 0.00    | 0.00   | 0.00   | -0.53 | 0.00   |
| Native    | Marginal tooth Stylus   | 3  | 0.67               | -100.00 | 8.61   | -2.87  | 0.62  | 0.00   |
| Native    | Central tooth Cusp      | 4  | -0.11              | 0.00    | 0.00   | 0.00   | -0.08 | 0.00   |
| Native    | Central tooth Stylus    | 4  | -1.04              | 0.00    | 6.34   | 6.34   | -1.03 | 0.00   |
| Native    | Lateral tooth I Cusp    | 4  | -0.29              | 100.00  | -16.84 | -12.46 | -0.32 | 0.00   |
| Native    | Lateral tooth I Stylus  | 4  | 0.23               | 0.00    | 0.00   | 0.00   | 0.25  | 0.00   |
| Native    | Lateral tooth II Basis  | 4  | 1.93               | 0.00    | -0.90  | -0.70  | 1.82  | 0.00   |
| Native    | Lateral tooth II Cusp   | 4  | 4.37               | 0.00    | 1.34   | 0.18   | 4.37  | -2.16  |
| Native    | Lateral tooth II Stylus | 4  | 0.00               | 0.00    | -2.20  | -0.48  | 0.00  | 5.93   |
| Native    | Marginal tooth Basis    | 4  | -0.36              | 0.00    | 0.00   | 10.77  | -0.38 | 29.58  |
| Native    | Marginal tooth Cusp     | 4  | 0.52               | 0.00    | 3.13   | 2.99   | 0.49  | 0.00   |
| Native    | Marginal tooth Stylus   | 4  | -0.92              | 100.00  | -8.61  | 2.87   | -0.92 | 0.00   |
| Native    | Central tooth Cusp      | 5  | -0.96              | 0.00    | 2.15   | 2.15   | -1.01 | 0.00   |
| Native    | Central tooth Stylus    | 5  | 0.52               | 0.00    | -6.34  | -6.34  | 0.54  | 0.00   |
| Native    | Lateral tooth I Cusp    | 5  | 0.80               | -100.00 | 8.75   | 4.38   | 0.82  | 0.00   |
| Native    | Lateral tooth I Stylus  | 5  | -0.53              | 0.00    | 0.00   | 0.00   | -0.58 | 0.00   |
| Native    | Lateral tooth II Basis  | 5  | 6.13               | 0.00    | 10.63  | 8.27   | 5.86  | 0.00   |
| Native    | Lateral tooth II Cusp   | 5  | 8.98               | 1.26    | 10.26  | 3.87   | 8.98  | 0.00   |
| Native    | Lateral tooth II Stylus | 5  | 3.45               | 0.00    | 6.12   | 5.55   | 3.22  | 22.22  |
| Native    | Marginal tooth Basis    | 5  | 7.70               | 0.00    | 6.35   | -4.62  | 7.18  | -29.58 |
| Native    | Marginal tooth Cusp     | 5  | 3.21               | 0.00    | 13.28  | 12.69  | 3.23  | 0.00   |
| Native    | Marginal tooth Stylus   | 5  | -0.24              | -100.00 | 13.52  | 2.05   | -0.22 | 0.00   |
| Native    | Central tooth Cusp      | 6  | 0.96               | 0.00    | 6.87   | 6.87   | 0.98  | 0.00   |
| Native    | Central tooth Stylus    | 6  | 0.15               | 0.00    | 0.00   | 0.00   | 0.18  | 0.00   |
| Native    | Lateral tooth I Cusp    | 6  | -1.09              | 0.00    | -8.75  | -8.75  | -1.10 | 0.00   |
| Native    | Lateral tooth I Stylus  | 6  | 0.38               | 0.00    | 0.00   | 0.00   | 0.38  | 0.00   |
| Native    | Lateral tooth II Basis  | 6  | 6.57               | 19.72   | 7.69   | 8.27   | 6.23  | 0.00   |
| Native    | Lateral tooth II Cusp   | 6  | 4.68               | 0.46    | -2.59  | -0.40  | 4.68  | 0.00   |
| Native    | Lateral tooth II Stylus | 6  | 1.47               | 2.00    | -1.88  | 3.14   | 1.70  | 26.67  |
| Native    | Marginal tooth Basis    | 6  | -5.17              | 0.00    | 1.59   | 1.54   | -4.68 | 0.00   |
| Native    | Marginal tooth Cusp     | 6  | 2.18               | 0.00    | -9.38  | -8.96  | 2.19  | 0.00   |
| Native    | Marginal tooth Stylus   | 6  | 3.86               | 0.00    | -13.52 | -13.52 | 3.82  | 0.00   |
| Native    | Central tooth Cusp      | 7  | 0.00               | 32.50   | 0.86   | 6.44   | 0.03  | 0.00   |
| Native    | Central tooth Stylus    | 7  | 0.82               | 0.00    | 0.00   | 0.00   | 0.77  | 0.00   |
| Native    | Lateral tooth I Cusp    | 7  | 0.86               | 0.00    | 0.00   | 0.00   | 0.86  | 0.00   |
| Native    | Lateral tooth I Stylus  | 7  | 0.15               | 0.00    | 0.00   | 0.00   | 0.18  | 0.00   |
| Native    | Lateral tooth II Basis  | 7  | 5.79               | 9.86    | -21.27 | -15.14 | 5.50  | 0.00   |
| Native    | Lateral tooth II Cusp   | 7  | 2.71               | 5.79    | 6.51   | 6.30   | 2.72  | 0.00   |
| Native    | Lateral tooth II Stylus | 7  | 3.73               | 1.46    | 0.00   | -1.77  | 3.75  | -23.70 |
| Native    | Marginal tooth Basis    | 7  | 4.69               | 0.00    | 22.75  | 22.05  | 4.67  | 0.00   |
| Native    | Marginal tooth Cusp     | 7  | 5.90               | 0.00    | 35.16  | 33.58  | 5.89  | 0.00   |
| Native    | Marginal tooth Stylus   | 7  | 1.47               | 0.00    | 0.00   | 0.00   | 1.53  | 0.00   |
| Native    | Central tooth Cusp      | 8  | 0.06               | -32.50  | -9.87  | -15.45 | 0.02  | 0.00   |
| Native    | Central tooth Stylus    | 8  | 0.07               | 36.36   | 0.00   | 7.46   | 0.09  | 0.00   |
| Native    | Lateral tooth I Cusp    | 8  | -0.40              | 0.00    | 0.00   | 0.00   | -0.39 | 0.00   |
| Native    | Lateral tooth I Stylus  | 8  | 0.38               | 0.00    | 0.00   | 0.00   | 0.39  | 0.00   |

|        |                         |    |       |         |         |        |       |        |
|--------|-------------------------|----|-------|---------|---------|--------|-------|--------|
| Native | Lateral tooth II Basis  | 8  | 6.18  | -12.68  | -2.49   | -3.52  | 5.87  | 0.00   |
| Native | Lateral tooth II Cusp   | 8  | 5.71  | 8.20    | -3.21   | 5.36   | 5.72  | 0.00   |
| Native | Lateral tooth II Stylus | 8  | 1.15  | -1.33   | -1.26   | -4.75  | 1.15  | -31.11 |
| Native | Marginal tooth Basis    | 8  | 3.25  | 0.00    | -30.69  | -29.74 | 3.35  | 0.00   |
| Native | Marginal tooth Cusp     | 8  | 3.61  | 0.00    | 27.34   | 26.12  | 3.61  | 0.00   |
| Native | Marginal tooth Stylus   | 8  | 0.49  | 0.00    | 8.61    | 8.61   | 0.45  | 0.00   |
| Native | Central tooth Cusp      | 9  | -0.73 | 0.00    | 0.00    | 0.00   | -0.71 | 0.00   |
| Native | Central tooth Stylus    | 9  | -0.97 | -36.36  | 10.07   | 2.61   | -0.98 | 0.00   |
| Native | Lateral tooth I Cusp    | 9  | 0.06  | 0.00    | 0.00    | 0.00   | 0.08  | 0.00   |
| Native | Lateral tooth I Stylus  | 9  | -0.69 | 0.00    | 0.00    | 0.00   | -0.72 | 0.00   |
| Native | Lateral tooth II Basis  | 9  | 6.18  | -4.23   | 7.92    | 5.81   | 5.87  | 0.00   |
| Native | Lateral tooth II Cusp   | 9  | 2.18  | 0.93    | -1.69   | 0.25   | 1.48  | 0.00   |
| Native | Lateral tooth II Stylus | 9  | 4.88  | 0.27    | 3.61    | 2.01   | 4.90  | 0.00   |
| Native | Marginal tooth Basis    | 9  | 1.44  | 0.00    | 29.63   | 28.72  | 1.48  | 0.00   |
| Native | Marginal tooth Cusp     | 9  | 6.01  | 0.00    | -30.47  | -29.10 | 6.47  | 0.00   |
| Native | Marginal tooth Stylus   | 9  | 6.49  | 0.00    | 18.03   | 18.03  | 6.50  | 0.00   |
| Native | Central tooth Cusp      | 10 | 0.45  | 0.00    | 17.17   | 17.17  | 0.46  | 0.00   |
| Native | Central tooth Stylus    | 10 | 0.89  | 0.00    | 12.31   | 12.31  | 0.94  | 0.00   |
| Native | Lateral tooth I Cusp    | 10 | -0.34 | 0.00    | 0.00    | 3.37   | -0.35 | 38.46  |
| Native | Lateral tooth I Stylus  | 10 | 0.46  | 100.00  | 0.00    | 14.08  | 0.47  | 20.00  |
| Native | Lateral tooth II Basis  | 10 | 3.81  | 32.39   | -8.60   | -1.94  | 3.64  | 2.18   |
| Native | Lateral tooth II Cusp   | 10 | 4.43  | 2.65    | 7.40    | 4.23   | 5.12  | 1.08   |
| Native | Lateral tooth II Stylus | 10 | 3.82  | 5.33    | 9.11    | 8.37   | 3.79  | 4.44   |
| Native | Marginal tooth Basis    | 10 | 3.13  | 0.00    | -29.63  | -24.62 | 3.05  | 11.27  |
| Native | Marginal tooth Cusp     | 10 | 4.01  | 0.00    | -39.06  | -35.07 | 3.54  | 11.54  |
| Native | Marginal tooth Stylus   | 10 | 3.86  | 0.00    | -10.66  | -9.02  | 3.85  | 33.33  |
| Native | Central tooth Cusp      | 11 | 0.17  | 0.00    | -17.17  | -17.17 | 0.16  | 0.00   |
| Native | Central tooth Stylus    | 11 | 0.00  | 0.00    | -10.45  | -8.96  | -0.05 | 6.52   |
| Native | Lateral tooth I Cusp    | 11 | 0.86  | 100.00  | 0.00    | 3.03   | 0.86  | -15.38 |
| Native | Lateral tooth I Stylus  | 11 | 0.08  | -100.00 | 0.00    | -13.59 | 0.11  | -15.00 |
| Native | Lateral tooth II Basis  | 11 | 2.37  | -30.99  | 8.14    | 1.58   | 2.26  | -2.18  |
| Native | Lateral tooth II Cusp   | 11 | 1.06  | 4.00    | 14.90   | 7.44   | 1.06  | 2.16   |
| Native | Lateral tooth II Stylus | 11 | 1.11  | -0.53   | 40.97   | 21.48  | 1.13  | 7.41   |
| Native | Marginal tooth Basis    | 11 | 4.45  | 0.00    | 0.00    | -3.59  | 4.57  | -9.86  |
| Native | Marginal tooth Cusp     | 11 | 6.01  | 0.00    | 46.88   | 50.00  | 6.00  | 26.92  |
| Native | Marginal tooth Stylus   | 11 | 6.92  | 0.00    | 10.66   | 9.02   | 6.93  | -25.00 |
| Native | Central tooth Cusp      | 12 | 0.28  | 0.00    | 6.87    | 6.87   | 0.28  | 0.00   |
| Native | Central tooth Stylus    | 12 | -0.30 | 12.73   | 10.45   | 11.19  | -0.26 | -6.52  |
| Native | Lateral tooth I Cusp    | 12 | -0.80 | -100.00 | 0.00    | -6.06  | -0.85 | -19.23 |
| Native | Lateral tooth I Stylus  | 12 | -0.76 | 0.00    | 0.00    | -0.49  | -0.78 | -5.00  |
| Native | Lateral tooth II Basis  | 12 | 1.21  | -9.86   | -2.04   | -1.76  | 1.13  | 2.62   |
| Native | Lateral tooth II Cusp   | 12 | 5.55  | 5.56    | 21.14   | 10.63  | 5.55  | 3.77   |
| Native | Lateral tooth II Stylus | 12 | 4.93  | -5.33   | 0.78    | -3.54  | 4.89  | -6.67  |
| Native | Marginal tooth Basis    | 12 | 3.61  | 0.00    | 0.00    | 0.51   | 3.54  | 1.41   |
| Native | Marginal tooth Cusp     | 12 | 6.87  | 0.00    | 53.13   | 47.76  | 6.87  | -15.38 |
| Native | Marginal tooth Stylus   | 12 | 6.06  | 0.00    | 6.15    | 7.38   | 6.03  | 16.67  |
| Native | Central tooth Cusp      | 13 | 0.34  | 0.00    | 60.52   | 60.52  | 0.36  | 0.00   |
| Native | Central tooth Stylus    | 13 | -0.67 | 41.82   | -22.39  | -13.43 | -0.68 | 0.00   |
| Native | Lateral tooth I Cusp    | 13 | -0.52 | 0.00    | 0.00    | 4.04   | -0.49 | 46.15  |
| Native | Lateral tooth I Stylus  | 13 | 0.31  | 0.00    | 0.00    | 3.88   | 0.31  | 40.00  |
| Native | Lateral tooth II Basis  | 13 | 11.15 | 1.41    | 23.98   | 24.12  | 10.60 | 12.66  |
| Native | Lateral tooth II Cusp   | 13 | 4.24  | 0.89    | -0.80   | -0.08  | 4.24  | -5.93  |
| Native | Lateral tooth II Stylus | 13 | 7.09  | 5.86    | -3.61   | 2.65   | 6.44  | 8.89   |
| Native | Marginal tooth Basis    | 13 | -0.24 | 0.00    | 0.00    | 4.10   | -0.20 | 11.27  |
| Native | Marginal tooth Cusp     | 13 | 5.61  | 0.00    | -100.00 | -97.01 | 5.62  | -7.69  |
| Native | Marginal tooth Stylus   | 13 | 6.80  | 0.00    | -32.79  | -31.56 | 6.82  | 25.00  |
| Native | Central tooth Cusp      | 14 | -0.45 | 0.00    | -67.38  | -67.38 | -0.45 | 0.00   |
| Native | Central tooth Stylus    | 14 | 0.07  | -54.55  | 0.00    | -5.60  | 0.04  | 32.61  |
| Native | Lateral tooth I Cusp    | 14 | 0.11  | 0.00    | 7.74    | 4.38   | 0.08  | -34.62 |
| Native | Lateral tooth I Stylus  | 14 | -0.08 | 0.00    | 59.71   | 61.17  | -0.09 | 20.00  |
| Native | Lateral tooth II Basis  | 14 | 9.82  | 4.23    | -8.60   | -11.80 | 9.37  | -13.97 |
| Native | Lateral tooth II Cusp   | 14 | 1.65  | 2.05    | 10.35   | 4.38   | 1.68  | -1.08  |
| Native | Lateral tooth II Stylus | 14 | 2.35  | -0.53   | 2.04    | -0.32  | 3.72  | -9.63  |
| Native | Marginal tooth Basis    | 14 | 1.56  | 0.00    | 0.00    | -5.13  | 2.53  | -14.08 |
| Native | Marginal tooth Cusp     | 14 | 5.61  | 0.00    | 85.94   | 82.09  | 5.58  | -3.85  |
| Native | Marginal tooth Stylus   | 14 | 8.57  | 0.00    | 10.25   | 7.79   | 8.55  | -50.00 |
| Native | Central tooth Cusp      | 15 | 4.78  | 100.00  | 0.00    | 26.18  | 4.88  | 77.78  |
| Native | Central tooth Stylus    | 15 | 6.94  | 0.00    | 0.00    | 1.12   | 6.95  | 6.52   |
| Native | Lateral tooth I Cusp    | 15 | 4.92  | 0.00    | -7.74   | 0.00   | 4.96  | 84.62  |
| Native | Lateral tooth I Stylus  | 15 | 6.41  | 0.00    | -46.12  | -47.57 | 6.34  | -20.00 |
| Native | Lateral tooth II Basis  | 15 | 0.50  | 52.11   | -2.26   | 6.34   | 0.46  | 4.37   |
| Native | Lateral tooth II Cusp   | 15 | 0.31  | 9.86    | -10.79  | 5.97   | 0.30  | 15.90  |
| Native | Lateral tooth II Stylus | 15 | 6.82  | 3.99    | 2.20    | 6.68   | 6.13  | 28.89  |
| Native | Marginal tooth Basis    | 15 | 4.09  | 0.00    | 34.92   | 40.51  | 3.13  | 18.31  |
| Native | Marginal tooth Cusp     | 15 | 3.66  | 0.00    | -69.53  | -62.69 | 3.68  | 23.08  |
| Native | Marginal tooth Stylus   | 15 | 3.00  | 0.00    | 33.20   | 37.70  | 3.01  | 91.67  |
| Native | Central tooth Cusp      | 16 | 6.41  | -100.00 | 40.77   | 22.75  | 6.53  | -11.11 |
| Native | Central tooth Stylus    | 16 | -0.82 | 0.00    | 0.00    | 10.45  | -0.81 | 60.87  |
| Native | Lateral tooth I Cusp    | 16 | 6.58  | 23.08   | 0.00    | -6.40  | 6.55  | -84.62 |
| Native | Lateral tooth I Stylus  | 16 | 0.00  | 0.00    | 1.46    | -2.43  | 0.04  | -40.00 |
| Native | Lateral tooth II Basis  | 16 | 3.42  | -12.68  | -1.13   | -4.75  | 3.70  | -5.68  |
| Native | Lateral tooth II Cusp   | 16 | 3.34  | -3.54   | 15.25   | 1.11   | 3.34  | -5.39  |

|        |                         |    |       |        |        |        |       |         |
|--------|-------------------------|----|-------|--------|--------|--------|-------|---------|
| Native | Lateral tooth II Stylus | 16 | 10.96 | -3.73  | 11.77  | 0.88   | 11.16 | -25.93  |
| Native | Marginal tooth Basis    | 16 | 7.10  | 0.00   | -34.92 | -37.95 | 7.15  | -11.27  |
| Native | Marginal tooth Cusp     | 16 | 1.89  | 0.00   | -16.41 | -2.99  | 1.85  | 65.38   |
| Native | Marginal tooth Stylus   | 16 | 2.82  | 0.00   | -37.30 | -36.89 | 2.80  | 8.33    |
| Native | Central tooth Cusp      | 17 | 5.34  | 0.00   | 6.44   | -1.72  | 5.41  | -66.67  |
| Native | Central tooth Stylus    | 17 | 9.47  | 0.00   | 0.00   | -13.06 | 9.43  | -76.09  |
| Native | Lateral tooth I Cusp    | 17 | 6.58  | -23.08 | 0.00   | 0.34   | 6.59  | 15.38   |
| Native | Lateral tooth I Stylus  | 17 | 8.54  | 0.00   | 9.71   | 15.05  | 8.49  | 55.00   |
| Native | Lateral tooth II Basis  | 17 | 0.39  | -45.07 | 1.58   | 7.22   | -0.09 | 28.82   |
| Native | Lateral tooth II Cusp   | 17 | 1.68  | 7.81   | -12.85 | 1.75   | 1.67  | -5.93   |
| Native | Lateral tooth II Stylus | 17 | 8.66  | -0.53  | -18.37 | -9.65  | 9.57  | 0.00    |
| Native | Marginal tooth Basis    | 17 | 2.77  | 0.00   | 0.00   | 10.77  | 2.85  | 29.58   |
| Native | Marginal tooth Cusp     | 17 | 2.98  | 0.00   | 0.00   | -10.45 | 2.98  | -53.85  |
| Native | Marginal tooth Stylus   | 17 | 2.76  | 0.00   | 26.64  | 22.54  | 2.80  | -83.33  |
| Native | Central tooth Cusp      | 18 | 6.19  | 0.00   | -36.48 | -36.48 | 6.30  | 0.00    |
| Native | Central tooth Stylus    | 18 | 4.40  | 0.00   | 0.00   | -4.10  | 4.46  | -23.91  |
| Native | Lateral tooth I Cusp    | 18 | 6.58  | 0.00   | 0.00   | -1.01  | 6.60  | -11.54  |
| Native | Lateral tooth I Stylus  | 18 | 5.95  | 0.00   | 8.25   | 5.34   | 5.92  | -30.00  |
| Native | Lateral tooth II Basis  | 18 | 6.35  | 28.17  | 7.24   | -1.76  | 6.06  | -27.07  |
| Native | Lateral tooth II Cusp   | 18 | 2.03  | -7.71  | 8.30   | -3.72  | 0.94  | -2.16   |
| Native | Lateral tooth II Stylus | 18 | 5.62  | 3.33   | 44.11  | 28.48  | 4.51  | 35.56   |
| Native | Marginal tooth Basis    | 18 | -1.93 | 0.00   | 0.00   | -11.28 | -0.84 | -30.99  |
| Native | Marginal tooth Cusp     | 18 | 2.98  | 0.00   | 0.00   | -5.22  | 2.98  | -26.92  |
| Native | Marginal tooth Stylus   | 18 | 2.82  | 0.00   | -19.26 | -20.08 | 2.80  | -16.67  |
| Native | Central tooth Cusp      | 19 | 6.75  | 0.00   | 9.44   | 9.44   | 6.87  | 0.00    |
| Native | Central tooth Stylus    | 19 | 4.25  | 0.00   | 15.67  | 15.67  | 4.19  | 0.00    |
| Native | Lateral tooth I Cusp    | 19 | 5.38  | 0.00   | 0.00   | -1.68  | 5.38  | -19.23  |
| Native | Lateral tooth I Stylus  | 19 | 2.59  | 0.00   | 6.80   | 4.37   | 2.57  | -25.00  |
| Native | Lateral tooth II Basis  | 19 | -2.10 | -26.76 | -20.59 | -18.66 | 1.02  | 1.75    |
| Native | Lateral tooth II Cusp   | 19 | 1.34  | -2.88  | 24.26  | 5.16   | 2.43  | 5.12    |
| Native | Lateral tooth II Stylus | 19 | 2.81  | 3.60   | -24.02 | -13.11 | 2.83  | -27.41  |
| Native | Marginal tooth Basis    | 19 | 3.37  | 0.00   | 26.98  | 24.10  | 2.23  | -5.63   |
| Native | Marginal tooth Cusp     | 19 | 2.98  | 0.00   | 30.47  | 25.37  | 2.98  | -19.23  |
| Native | Marginal tooth Stylus   | 19 | 2.82  | 0.00   | -13.52 | -13.52 | 2.80  | 0.00    |
| Native | Central tooth Cusp      | 20 | -0.62 | 0.00   | -9.01  | -9.01  | -0.58 | 0.00    |
| Native | Central tooth Stylus    | 20 | 3.21  | 0.00   | -10.45 | -10.45 | 3.20  | 0.00    |
| Native | Lateral tooth I Cusp    | 20 | 1.20  | 0.00   | 0.00   | 0.00   | 1.21  | 0.00    |
| Native | Lateral tooth I Stylus  | 20 | 5.11  | 0.00   | 14.08  | 14.08  | 5.10  | 0.00    |
| Native | Lateral tooth II Basis  | 20 | 0.44  | 21.13  | -3.39  | 12.50  | 1.99  | 31.00   |
| Native | Lateral tooth II Cusp   | 20 | 4.65  | 10.06  | 2.85   | 10.60  | 4.64  | 22.37   |
| Native | Lateral tooth II Stylus | 20 | 6.77  | 2.26   | 24.80  | 13.35  | 6.74  | -6.67   |
| Native | Marginal tooth Basis    | 20 | 2.77  | 0.00   | -26.98 | -25.13 | 2.85  | 2.82    |
| Native | Marginal tooth Cusp     | 20 | 2.98  | 0.00   | -30.47 | -29.10 | 2.98  | 0.00    |
| Native | Marginal tooth Stylus   | 20 | 2.82  | 0.00   | 13.52  | 13.52  | 2.80  | 0.00    |
| Native | Central tooth Cusp      | 21 | 8.38  | 0.00   | 11.59  | 11.59  | 8.54  | 0.00    |
| Native | Central tooth Stylus    | 21 | 5.52  | 0.00   | 46.27  | 46.27  | 5.54  | 0.00    |
| Native | Lateral tooth I Cusp    | 21 | 6.64  | 0.00   | 21.55  | 21.55  | 6.60  | 0.00    |
| Native | Lateral tooth I Stylus  | 21 | 3.43  | 0.00   | -22.82 | -22.82 | 3.41  | 0.00    |
| Native | Lateral tooth II Basis  | 21 | 2.48  | 2.82   | -2.49  | 0.53   | 2.47  | 5.24    |
| Native | Lateral tooth II Cusp   | 21 | 1.00  | 0.23   | 7.31   | 0.25   | 1.01  | -21.56  |
| Native | Lateral tooth II Stylus | 21 | 4.79  | 11.85  | 1.10   | 7.00   | 6.14  | -6.67   |
| Native | Marginal tooth Basis    | 21 | 2.89  | 0.00   | 0.00   | 7.18   | 2.85  | 19.72   |
| Native | Marginal tooth Cusp     | 21 | 2.98  | 0.00   | 0.00   | 11.94  | 2.98  | 61.54   |
| Native | Marginal tooth Stylus   | 21 | 1.47  | 28.57  | -13.52 | -6.15  | 1.51  | 83.33   |
| Native | Central tooth Cusp      | 22 | 3.99  | 0.00   | -3.00  | 7.73   | 4.03  | 92.59   |
| Native | Central tooth Stylus    | 22 | 5.89  | 0.00   | -36.57 | -30.60 | 5.91  | 34.78   |
| Native | Lateral tooth I Cusp    | 22 | 7.61  | 0.00   | -21.55 | -16.16 | 6.58  | 61.54   |
| Native | Lateral tooth I Stylus  | 22 | 8.54  | 0.00   | -10.68 | -0.97  | 8.47  | 100.00  |
| Native | Lateral tooth II Basis  | 22 | 0.44  | 0.00   | 5.66   | -10.21 | 0.43  | -35.81  |
| Native | Lateral tooth II Cusp   | 22 | 2.09  | 7.31   | -27.12 | -1.49  | 2.08  | 6.74    |
| Native | Lateral tooth II Stylus | 22 | 0.60  | 11.85  | -15.38 | 5.95   | -0.72 | 61.48   |
| Native | Marginal tooth Basis    | 22 | 2.77  | 0.00   | 37.57  | 46.15  | 2.85  | 25.35   |
| Native | Marginal tooth Cusp     | 22 | 2.98  | 0.00   | 42.97  | 37.31  | 2.98  | -19.23  |
| Native | Marginal tooth Stylus   | 22 | 4.10  | -28.57 | 26.64  | 19.26  | 4.09  | -83.33  |
| Native | Central tooth Cusp      | 23 | 5.17  | 0.00   | 2.15   | -8.58  | 5.30  | -92.59  |
| Native | Central tooth Stylus    | 23 | 8.58  | 23.64  | 11.57  | 10.45  | 8.53  | -34.78  |
| Native | Lateral tooth I Cusp    | 23 | 4.52  | 0.00   | 0.00   | -4.38  | 5.56  | -50.00  |
| Native | Lateral tooth I Stylus  | 23 | 5.64  | 0.00   | 14.08  | 4.37   | 5.62  | -100.00 |
| Native | Lateral tooth II Basis  | 23 | 0.22  | 33.80  | -2.04  | 9.15   | 0.26  | 15.72   |
| Native | Lateral tooth II Cusp   | 23 | 3.96  | 6.78   | 4.64   | 5.39   | 3.99  | -11.86  |
| Native | Lateral tooth II Stylus | 23 | 0.37  | 2.93   | -29.04 | -15.53 | 0.33  | -22.96  |
| Native | Marginal tooth Basis    | 23 | 8.54  | 0.00   | -37.57 | -54.36 | 8.54  | -47.89  |
| Native | Marginal tooth Cusp     | 23 | 4.87  | 0.00   | -42.97 | -43.28 | 4.87  | -11.54  |
| Native | Marginal tooth Stylus   | 23 | 9.37  | 0.00   | 10.66  | 10.66  | 9.34  | 0.00    |
| Native | Central tooth Cusp      | 24 | 4.11  | 0.00   | -13.30 | -1.72  | 4.17  | 100.00  |
| Native | Central tooth Stylus    | 24 | -0.37 | -23.64 | -26.49 | -29.85 | -0.35 | 8.70    |
| Native | Lateral tooth I Cusp    | 24 | 1.03  | 0.00   | 0.00   | -1.01  | 1.04  | -11.54  |
| Native | Lateral tooth I Stylus  | 24 | 2.90  | 0.00   | -27.67 | -27.67 | 2.88  | 0.00    |
| Native | Lateral tooth II Basis  | 24 | 1.05  | 21.13  | 18.78  | 26.06  | 1.04  | 21.83   |
| Native | Lateral tooth II Cusp   | 24 | 3.03  | 4.70   | 11.78  | 9.41   | 3.02  | 26.42   |
| Native | Lateral tooth II Stylus | 24 | 3.96  | 13.98  | 12.56  | 11.18  | 3.98  | -33.33  |
| Native | Marginal tooth Basis    | 24 | 0.00  | 0.00   | 0.00   | 0.00   | 0.00  | 0.00    |

|        |                         |    |        |        |        |        |        |         |
|--------|-------------------------|----|--------|--------|--------|--------|--------|---------|
| Native | Marginal tooth Cusp     | 24 | 4.64   | 0.00   | 0.00   | -5.97  | 4.58   | -30.77  |
| Native | Marginal tooth Stylus   | 24 | -3.74  | 0.00   | 10.25  | 10.25  | -3.74  | 0.00    |
| Native | Central tooth Cusp      | 25 | 0.11   | 0.00   | 91.42  | 79.83  | 0.13   | -100.00 |
| Native | Central tooth Stylus    | 25 | 8.13   | 7.27   | 97.76  | 97.76  | 8.15   | -8.70   |
| Native | Lateral tooth I Cusp    | 25 | 1.32   | 0.00   | 34.01  | 34.01  | 1.32   | 0.00    |
| Native | Lateral tooth I Stylus  | 25 | 8.47   | 0.00   | 90.78  | 90.78  | 8.46   | 0.00    |
| Native | Lateral tooth II Basis  | 25 | -0.11  | -76.06 | -17.87 | -32.04 | -0.14  | -21.40  |
| Native | Lateral tooth II Cusp   | 25 | 3.68   | 17.00  | 3.39   | 13.18  | 3.67   | -8.63   |
| Native | Lateral tooth II Stylus | 25 | 3.96   | 3.06   | 27.47  | 16.81  | 3.95   | 8.15    |
| Native | Marginal tooth Basis    | 25 | -12.76 | 0.00   | 0.00   | 0.00   | -12.82 | 0.00    |
| Native | Marginal tooth Stylus   | 25 | 1.43   | 0.00   | 45.31  | 43.28  | 1.48   | 0.00    |
| Native | Marginal tooth Stylus   | 25 | 3.74   | 0.00   | -20.90 | -20.90 | 3.74   | 0.00    |
| Native | Central tooth Cusp      | 26 | 2.92   | 0.00   | -80.26 | -80.26 | 2.96   | 0.00    |
| Native | Central tooth Stylus    | 26 | -4.10  | -7.27  | -97.76 | -99.25 | -4.12  | 0.00    |
| Native | Lateral tooth I Cusp    | 26 | 5.27   | 0.00   | -34.01 | -34.01 | 5.25   | 0.00    |
| Native | Lateral tooth I Stylus  | 26 | -4.27  | 0.00   | -50.49 | -50.49 | -4.28  | 0.00    |
| Native | Lateral tooth II Basis  | 26 | 0.22   | 43.66  | -3.39  | 1.76   | 0.22   | -2.62   |
| Native | Lateral tooth II Cusp   | 26 | 0.84   | 4.10   | -25.51 | -5.01  | 0.84   | -9.43   |
| Native | Lateral tooth II Stylus | 26 | -8.52  | 9.85   | -27.16 | -9.41  | -8.51  | -12.59  |
| Native | Marginal tooth Basis    | 26 | 7.34   | 0.00   | 8.47   | 32.82  | 7.39   | 66.20   |
| Native | Marginal tooth Cusp     | 26 | 0.00   | 0.00   | -45.31 | -43.28 | 0.00   | 0.00    |
| Native | Marginal tooth Stylus   | 26 | -1.47  | 0.00   | -22.13 | -22.13 | -1.48  | 0.00    |
| Native | Central tooth Cusp      | 27 | 6.13   | 0.00   | -13.30 | -13.30 | 6.27   | 0.00    |
| Native | Central tooth Stylus    | 27 | 8.13   | 0.00   | 7.46   | 7.46   | 8.13   | 0.00    |
| Native | Lateral tooth I Cusp    | 27 | 6.58   | 0.00   | 7.07   | 7.41   | 6.58   | 3.85    |
| Native | Lateral tooth I Stylus  | 27 | 4.27   | 0.00   | -7.28  | -7.28  | 4.30   | 0.00    |
| Native | Lateral tooth II Basis  | 27 | 0.00   | -1.41  | 20.59  | 48.94  | 0.03   | 82.53   |
| Native | Lateral tooth II Cusp   | 27 | 9.98   | -2.58  | 0.98   | -1.85  | 10.00  | -1.62   |
| Native | Lateral tooth II Stylus | 27 | -0.51  | 14.11  | 4.40   | 21.48  | -1.96  | 97.04   |
| Native | Marginal tooth Basis    | 27 | -7.34  | 0.00   | -8.47  | -32.82 | -7.34  | -66.20  |
| Native | Marginal tooth Cusp     | 27 | -6.07  | 0.00   | 32.03  | 30.60  | -6.07  | 0.00    |
| Native | Marginal tooth Stylus   | 27 | 1.47   | 0.00   | 22.13  | 22.13  | 1.48   | 0.00    |
| Native | Central tooth Cusp      | 28 | 10.85  | 0.00   | -6.44  | -6.44  | 11.05  | 0.00    |
| Native | Central tooth Stylus    | 28 | 4.18   | 0.00   | -7.46  | -7.46  | 4.18   | 0.00    |
| Native | Lateral tooth I Cusp    | 28 | 6.53   | 0.00   | -7.07  | -7.41  | 6.57   | -3.85   |
| Native | Lateral tooth I Stylus  | 28 | 8.54   | 0.00   | -23.79 | -23.79 | 8.47   | 0.00    |
| Native | Lateral tooth II Basis  | 28 | -2.10  | 18.31  | 4.30   | -25.00 | -2.09  | -75.98  |
| Native | Lateral tooth II Cusp   | 28 | -0.44  | 11.48  | -10.17 | 8.15   | -0.44  | 23.72   |
| Native | Lateral tooth II Stylus | 28 | 0.05   | 2.80   | -1.41  | -5.15  | 1.49   | -55.56  |
| Native | Marginal tooth Basis    | 28 | 4.33   | 0.00   | 0.00   | 0.00   | 4.34   | 0.00    |
| Native | Marginal tooth Cusp     | 28 | 4.64   | 0.00   | 10.94  | 10.45  | 4.58   | 0.00    |
| Native | Marginal tooth Stylus   | 28 | 0.00   | 0.00   | 5.33   | 5.33   | 0.00   | 0.00    |
| Native | Central tooth Cusp      | 29 | 6.69   | 0.00   | 40.77  | 40.77  | 6.82   | 0.00    |
| Native | Central tooth Stylus    | 29 | 8.95   | 0.00   | 32.46  | 32.46  | 8.98   | 0.00    |
| Native | Lateral tooth I Cusp    | 29 | 6.58   | 0.00   | 0.00   | 0.00   | 6.58   | 0.00    |
| Native | Lateral tooth I Stylus  | 29 | 3.89   | 0.00   | 23.79  | 23.79  | 3.85   | 0.00    |
| Native | Lateral tooth II Basis  | 29 | -2.48  | -11.27 | 19.23  | 26.41  | -2.49  | 31.44   |
| Native | Lateral tooth II Cusp   | 29 | -3.31  | 0.56   | 5.98   | 0.18   | -3.31  | -20.75  |
| Native | Lateral tooth II Stylus | 29 | 3.04   | 0.13   | 16.48  | 6.28   | 3.05   | -20.74  |
| Native | Marginal tooth Basis    | 29 | 4.93   | 0.00   | 42.86  | 41.54  | 4.97   | 0.00    |
| Native | Marginal tooth Cusp     | 29 | 1.43   | 0.00   | 55.47  | 52.99  | 1.48   | 0.00    |
| Native | Marginal tooth Stylus   | 29 | 6.55   | 0.00   | -18.03 | -18.03 | 6.58   | 0.00    |
| Native | Central tooth Cusp      | 30 | 0.17   | 0.00   | -40.77 | -40.77 | 0.20   | 0.00    |
| Native | Central tooth Stylus    | 30 | -3.73  | 67.27  | -32.46 | -18.66 | -3.73  | 0.00    |
| Native | Lateral tooth I Cusp    | 30 | 0.06   | 0.00   | 0.00   | 0.00   | 0.02   | 0.00    |
| Native | Lateral tooth I Stylus  | 30 | -3.81  | 0.00   | 9.71   | 9.71   | -3.81  | 0.00    |
| Native | Lateral tooth II Basis  | 30 | -2.59  | 26.76  | -23.08 | -15.49 | -2.61  | -2.62   |
| Native | Lateral tooth II Cusp   | 30 | 1.34   | -13.20 | -9.28  | -12.90 | 1.35   | -1.62   |
| Native | Lateral tooth II Stylus | 30 | -9.17  | -1.20  | -14.13 | -5.87  | -9.18  | 19.26   |
| Native | Marginal tooth Basis    | 30 | 6.98   | 0.00   | -42.86 | -5.13  | 6.93   | 100.00  |
| Native | Marginal tooth Cusp     | 30 | 0.00   | 0.00   | -98.44 | -94.03 | 0.00   | 0.00    |
| Native | Marginal tooth Stylus   | 30 | -5.33  | 0.00   | 77.87  | 77.87  | -5.36  | 0.00    |
| Native | Central tooth Cusp      | 31 | 0.79   | 0.00   | 37.77  | 37.77  | 0.77   | 0.00    |
| Native | Central tooth Stylus    | 31 | 2.98   | -67.27 | 12.31  | -1.49  | 2.94   | 0.00    |
| Native | Lateral tooth I Cusp    | 31 | 6.58   | 0.00   | 0.00   | 0.00   | 6.58   | 0.00    |
| Native | Lateral tooth I Stylus  | 31 | 8.47   | 0.00   | 3.40   | 3.40   | 8.46   | 0.00    |
| Native | Lateral tooth II Basis  | 31 | 6.18   | -8.45  | -0.45  | -20.25 | 6.17   | -45.85  |
| Native | Lateral tooth II Cusp   | 31 | 1.97   | 6.42   | -8.39  | 4.53   | 1.94   | 21.02   |
| Native | Lateral tooth II Stylus | 31 | 6.26   | -0.80  | -1.41  | 2.33   | 6.26   | 32.59   |
| Native | Marginal tooth Basis    | 31 | -8.90  | 0.00   | 16.40  | -20.51 | -8.91  | -100.00 |
| Native | Marginal tooth Cusp     | 31 | 0.57   | 0.00   | 76.56  | 73.13  | 0.57   | 0.00    |
| Native | Marginal tooth Stylus   | 31 | -1.22  | 0.00   | -34.43 | -34.43 | -1.22  | 0.00    |
| Native | Central tooth Cusp      | 32 | 3.60   | 0.00   | 33.48  | 33.48  | 3.70   | 0.00    |
| Native | Central tooth Stylus    | 32 | 4.03   | 0.00   | -12.31 | -12.31 | 4.07   | 0.00    |
| Native | Lateral tooth I Cusp    | 32 | -0.34  | 0.00   | 0.00   | 0.00   | -0.32  | 0.00    |
| Native | Lateral tooth I Stylus  | 32 | 4.27   | 0.00   | -21.36 | -21.36 | 4.23   | 0.00    |
| Native | Lateral tooth II Basis  | 32 | -4.69  | 23.94  | 1.36   | 7.04   | -6.71  | 6.99    |
| Native | Lateral tooth II Cusp   | 32 | -7.67  | -2.08  | 5.80   | -2.30  | -9.88  | -24.80  |
| Native | Lateral tooth II Stylus | 32 | -2.12  | 5.06   | 0.00   | -4.83  | -4.00  | -73.33  |
| Native | Marginal tooth Basis    | 32 | -7.34  | 0.00   | -16.40 | -15.90 | -7.34  | 0.00    |
| Native | Marginal tooth Cusp     | 32 | -2.75  | 0.00   | -29.69 | -28.36 | -2.76  | 0.00    |
| Native | Marginal tooth Stylus   | 32 | 0.00   | 0.00   | -8.61  | -8.61  | 0.00   | 0.00    |



|         |                         |    |       |         |        |         |        |        |
|---------|-------------------------|----|-------|---------|--------|---------|--------|--------|
| Native  | Central tooth Cusp      | 33 | -0.45 | 0.00    | -27.47 | -27.47  | -0.50  | 0.00   |
| Native  | Central tooth Stylus    | 33 | -4.03 | 27.27   | 36.19  | 42.54   | -4.04  | 4.35   |
| Native  | Lateral tooth I Cusp    | 33 | -0.69 | 0.00    | 0.00   | 0.00    | -0.67  | 0.00   |
| Native  | Lateral tooth I Stylus  | 33 | -4.20 | 0.00    | 26.70  | 26.70   | -4.19  | 0.00   |
| Native  | Lateral tooth II Basis  | 33 | 5.08  | -66.20  | 0.45   | -5.63   | 7.13   | 6.11   |
| Native  | Lateral tooth II Cusp   | 33 | 7.42  | 3.11    | -8.74  | 5.21    | 9.65   | 56.60  |
| Native  | Lateral tooth II Stylus | 33 | 2.21  | -4.66   | -26.69 | -10.94  | 4.08   | 52.59  |
| Native  | Marginal tooth Basis    | 33 | 4.33  | 0.00    | 0.00   | 0.00    | 4.34   | 0.00   |
| Native  | Marginal tooth Cusp     | 33 | 1.20  | 0.00    | -46.88 | -44.78  | -6.31  | 0.00   |
| Native  | Marginal tooth Stylus   | 33 | 0.43  | 0.00    | -24.18 | -24.18  | 0.46   | 0.00   |
| Native  | Central tooth Cusp      | 34 | 3.66  | 0.00    | -21.46 | -21.46  | -0.48  | 0.00   |
| Native  | Central tooth Stylus    | 34 | 0.00  | -27.27  | 63.81  | 57.46   | 0.01   | -4.35  |
| Native  | Lateral tooth I Cusp    | 34 | 0.40  | 0.00    | 100.00 | 100.00  | -0.65  | 0.00   |
| Native  | Lateral tooth I Stylus  | 34 | 0.15  | 0.00    | 26.70  | 26.70   | 0.73   | 0.00   |
| Native  | Lateral tooth II Basis  | 34 | -2.70 | -21.13  | 17.87  | 5.46    | -2.73  | -14.85 |
| Native  | Lateral tooth II Cusp   | 34 | -6.64 | -1.06   | -0.62  | -2.40   | -8.89  | -15.09 |
| Native  | Lateral tooth II Stylus | 34 | -1.61 | 14.91   | 1.88   | 5.15    | -3.48  | -44.44 |
| Native  | Marginal tooth Basis    | 34 | 4.93  | 0.00    | 62.96  | 61.03   | 4.97   | 0.00   |
| Native  | Marginal tooth Cusp     | 34 | -0.46 | 0.00    | 42.97  | 41.04   | -0.45  | 0.00   |
| Native  | Marginal tooth Stylus   | 34 | -0.43 | 0.00    | 9.84   | 9.84    | -0.46  | 0.00   |
| Native  | Central tooth Cusp      | 35 | -2.59 | 0.00    | 36.91  | 36.91   | -8.94  | 0.00   |
| Native  | Central tooth Stylus    | 35 | -0.67 | 100.00  | -25.00 | -4.48   | -0.69  | 0.00   |
| Native  | Lateral tooth I Cusp    | 35 | -1.60 | 0.00    | -51.18 | -50.51  | -2.67  | 7.69   |
| Native  | Lateral tooth I Stylus  | 35 | -0.92 | 0.00    | -21.36 | -21.36  | -1.42  | 0.00   |
| Native  | Lateral tooth II Basis  | 35 | -1.82 | 1.41    | -0.45  | 8.80    | -1.82  | 22.27  |
| Native  | Lateral tooth II Cusp   | 35 | 7.74  | 2.12    | 5.80   | 2.56    | 9.96   | -7.55  |
| Native  | Lateral tooth II Stylus | 35 | 0.37  | -38.48  | 10.52  | -16.49  | 2.23   | 12.59  |
| Native  | Marginal tooth Basis    | 35 | 9.15  | 0.00    | -62.96 | -61.03  | 6.91   | 0.00   |
| Native  | Marginal tooth Cusp     | 35 | -6.07 | 0.00    | -42.97 | -41.04  | -5.60  | 0.00   |
| Native  | Marginal tooth Stylus   | 35 | 0.00  | 0.00    | 23.36  | 23.36   | 0.00   | 0.00   |
| Native  | Central tooth Cusp      | 36 | -3.37 | 0.00    | 4.72   | 4.72    | 7.07   | 0.00   |
| Native  | Central tooth Stylus    | 36 | 9.69  | -100.00 | -51.12 | -57.46  | 9.70   | 80.43  |
| Native  | Lateral tooth I Cusp    | 36 | 0.46  | 0.00    | -48.82 | -49.49  | 0.49   | -7.69  |
| Native  | Lateral tooth I Stylus  | 36 | 2.90  | 0.00    | 18.45  | 18.45   | 2.83   | 0.00   |
| Native  | Lateral tooth II Basis  | 36 | -0.55 | 4.23    | -1.13  | -10.56  | -0.55  | -24.89 |
| Native  | Lateral tooth II Cusp   | 36 | -6.02 | -2.45   | 2.23   | 0.99    | -9.99  | 23.72  |
| Native  | Lateral tooth II Stylus | 36 | 4.05  | 23.44   | 6.91   | 15.85   | 4.06   | -17.78 |
| Native  | Marginal tooth Basis    | 36 | -8.54 | 0.00    | 0.00   | 2.05    | -17.51 | 5.63   |
| Native  | Marginal tooth Stylus   | 36 | 0.00  | 0.00    | 42.21  | 42.21   | 0.00   | 0.00   |
| Native  | Central tooth Cusp      | 37 | 4.11  | 0.00    | -37.77 | -37.77  | 4.20   | 0.00   |
| Native  | Central tooth Stylus    | 37 | -6.34 | 0.00    | 10.82  | -3.36   | -6.34  | -80.43 |
| Native  | Lateral tooth I Cusp    | 37 | 2.18  | 0.00    | 0.00   | 0.00    | 4.25   | 0.00   |
| Native  | Lateral tooth I Stylus  | 37 | 0.61  | 0.00    | -31.07 | -31.07  | 0.66   | 0.00   |
| Native  | Lateral tooth II Basis  | 37 | 0.00  | -5.63   | 14.93  | 10.04   | 0.02   | -2.62  |
| Native  | Lateral tooth II Cusp   | 37 | -1.28 | -2.48   | 3.48   | 2.35    | 0.49   | 34.77  |
| Native  | Lateral tooth II Stylus | 37 | 1.38  | -7.19   | -1.10  | -4.91   | 1.40   | -0.74  |
| Native  | Marginal tooth Basis    | 37 | -0.60 | 0.00    | 0.00   | -2.05   | 10.60  | -5.63  |
| Native  | Marginal tooth Cusp     | 37 | 1.43  | 0.00    | 0.00   | 0.00    | 1.37   | 0.00   |
| Native  | Marginal tooth Cusp     | 37 | 3.32  | 0.00    | 0.00   | 0.00    | 3.02   | 0.00   |
| Native  | Marginal tooth Stylus   | 37 | 0.00  | 0.00    | -51.64 | -51.64  | 0.00   | 0.00   |
| Native  | Central tooth Cusp      | 38 | -1.52 | 0.00    | 58.37  | 58.37   | -1.54  | 0.00   |
| Native  | Central tooth Stylus    | 38 | 0.82  | 0.00    | 10.82  | 10.82   | 0.83   | 0.00   |
| Native  | Lateral tooth I Cusp    | 38 | -3.89 | 0.00    | 53.20  | 53.20   | -2.01  | 0.00   |
| Native  | Lateral tooth I Stylus  | 38 | 2.29  | 0.00    | 49.03  | 49.03   | 2.80   | 0.00   |
| Native  | Lateral tooth II Basis  | 38 | 7.40  | 4.23    | -0.90  | 0.00    | 7.41   | 0.00   |
| Native  | Lateral tooth II Cusp   | 38 | 3.03  | 14.65   | -0.36  | 9.94    | 3.02   | -12.40 |
| Native  | Lateral tooth II Stylus | 38 | 2.72  | 10.12   | 11.77  | 12.63   | 2.71   | 5.19   |
| Native  | Marginal tooth Basis    | 38 | 8.66  | 0.00    | 100.00 | 100.00  | 8.61   | 8.45   |
| Native  | Marginal tooth Cusp     | 38 | -3.32 | 0.00    | 0.00   | 0.00    | -3.02  | 0.00   |
| Native  | Marginal tooth Stylus   | 38 | 0.43  | 64.29   | 24.18  | 31.56   | 0.46   | 0.00   |
| Treated | Central tooth Cusp      | 1  | 0.29  | 0.00    | 0.00   | 0.00    | 0.30   | 0.00   |
| Treated | Central tooth Stylus    | 1  | 0.72  | 0.00    | 0.00   | 0.00    | 0.74   | 0.00   |
| Treated | Lateral tooth I Cusp    | 1  | -0.91 | 100.00  | 0.00   | 29.17   | -1.09  | 0.00   |
| Treated | Lateral tooth I Stylus  | 1  | 0.40  | 0.00    | 0.00   | 0.00    | -0.84  | 0.00   |
| Treated | Lateral tooth II Basis  | 1  | 1.30  | 0.00    | 0.00   | 0.00    | 0.64   | 0.00   |
| Treated | Lateral tooth II Cusp   | 1  | 3.53  | 0.00    | 0.00   | 0.00    | 6.59   | 0.00   |
| Treated | Lateral tooth II Stylus | 1  | -0.56 | 0.10    | 0.00   | 0.09    | -0.40  | 0.00   |
| Treated | Marginal tooth Basis    | 1  | 3.02  | 0.00    | 0.00   | 0.00    | 3.10   | 0.00   |
| Treated | Marginal tooth Cusp     | 1  | -0.67 | -100.00 | 0.00   | -100.00 | -0.68  | 0.00   |
| Treated | Marginal tooth Stylus   | 1  | 1.91  | 0.00    | 0.00   | 0.00    | 1.58   | 0.00   |
| Treated | Central tooth Cusp      | 2  | 0.29  | 0.00    | 0.00   | 0.00    | 0.31   | 0.00   |
| Treated | Central tooth Stylus    | 2  | 0.52  | 0.00    | 0.00   | 0.00    | 0.51   | 0.00   |
| Treated | Lateral tooth I Cusp    | 2  | -0.98 | -100.00 | 0.00   | -29.17  | 0.71   | 0.00   |
| Treated | Lateral tooth I Stylus  | 2  | -0.30 | 0.00    | 0.00   | 0.00    | -1.65  | 0.00   |
| Treated | Lateral tooth II Basis  | 2  | 10.11 | 0.00    | 0.00   | 0.00    | 5.12   | 0.00   |
| Treated | Lateral tooth II Cusp   | 2  | 3.99  | 0.00    | 0.00   | 0.00    | 1.60   | 0.00   |
| Treated | Lateral tooth II Stylus | 2  | 0.32  | -0.10   | 0.00   | -0.09   | 0.28   | 0.00   |
| Treated | Marginal tooth Basis    | 2  | 3.02  | 0.00    | 0.00   | 0.00    | 2.30   | 0.00   |
| Treated | Marginal tooth Cusp     | 2  | 2.19  | 0.00    | 0.00   | 0.00    | 2.01   | 0.00   |
| Treated | Marginal tooth Stylus   | 2  | 1.61  | 100.00  | 0.00   | 80.00   | 1.28   | 0.00   |
| Treated | Central tooth Cusp      | 3  | 1.17  | 100.00  | 0.00   | 40.00   | 1.22   | 0.00   |
| Treated | Central tooth Stylus    | 3  | 0.10  | 37.14   | 0.00   | 57.14   | 0.12   | 100.00 |

|         |                         |    |        |         |        |        |        |         |
|---------|-------------------------|----|--------|---------|--------|--------|--------|---------|
| Treated | Lateral tooth I Cusp    | 3  | 0.68   | 0.00    | 0.00   | 0.00   | 0.06   | 0.00    |
| Treated | Lateral tooth I Stylus  | 3  | 0.30   | 0.00    | 0.00   | 0.00   | 0.42   | 0.00    |
| Treated | Lateral tooth II Basis  | 3  | -0.74  | 0.00    | 0.00   | 0.00   | -0.38  | 0.00    |
| Treated | Lateral tooth II Cusp   | 3  | -0.97  | 0.00    | 5.00   | 0.09   | -0.66  | 0.00    |
| Treated | Lateral tooth II Stylus | 3  | 0.56   | 0.00    | 0.00   | 0.00   | 0.56   | 0.00    |
| Treated | Marginal tooth Basis    | 3  | 8.35   | 0.00    | 0.00   | 0.00   | 9.52   | 0.00    |
| Treated | Marginal tooth Cusp     | 3  | -0.48  | 0.00    | 0.00   | 0.00   | -0.49  | 0.00    |
| Treated | Marginal tooth Stylus   | 3  | 1.31   | -100.00 | 0.00   | -80.00 | 1.06   | 0.00    |
| Treated | Central tooth Cusp      | 4  | -0.73  | -100.00 | 0.00   | -40.00 | -0.75  | 0.00    |
| Treated | Central tooth Stylus    | 4  | -0.93  | -37.14  | 0.00   | -57.14 | -1.00  | -100.00 |
| Treated | Lateral tooth I Cusp    | 4  | 0.00   | 71.43   | 0.00   | 20.83  | 1.14   | 0.00    |
| Treated | Lateral tooth I Stylus  | 4  | 0.40   | 0.00    | 0.00   | 0.00   | 0.42   | 0.00    |
| Treated | Lateral tooth II Basis  | 4  | 2.97   | 0.00    | 0.00   | 0.00   | 1.50   | 0.00    |
| Treated | Lateral tooth II Cusp   | 4  | 3.13   | 0.00    | 8.33   | 0.22   | 3.39   | 100.00  |
| Treated | Lateral tooth II Stylus | 4  | -5.85  | 0.00    | 0.00   | 0.09   | -5.79  | 33.33   |
| Treated | Marginal tooth Basis    | 4  | -0.36  | 0.00    | 0.00   | 0.00   | -0.30  | 0.00    |
| Treated | Marginal tooth Cusp     | 4  | 0.67   | 0.00    | 0.00   | 0.00   | 0.62   | 0.00    |
| Treated | Marginal tooth Stylus   | 4  | -1.21  | 100.00  | 0.00   | 85.71  | -0.96  | 100.00  |
| Treated | Central tooth Cusp      | 5  | -0.51  | 0.00    | 2.00   | 2.00   | -0.55  | 0.00    |
| Treated | Central tooth Stylus    | 5  | 0.52   | 0.00    | 0.00   | 0.00   | 0.61   | 0.00    |
| Treated | Lateral tooth I Cusp    | 5  | 1.06   | -71.43  | 0.00   | -20.83 | -1.29  | 0.00    |
| Treated | Lateral tooth I Stylus  | 5  | -0.60  | 0.00    | 0.00   | 0.00   | -0.58  | 0.00    |
| Treated | Lateral tooth II Basis  | 5  | 9.18   | 0.00    | 0.00   | 0.00   | 4.64   | 0.00    |
| Treated | Lateral tooth II Cusp   | 5  | 6.42   | 1.25    | 38.33  | 1.90   | 6.95   | -100.00 |
| Treated | Lateral tooth II Stylus | 5  | 3.69   | 0.00    | 5.04   | 0.55   | 3.67   | -33.33  |
| Treated | Marginal tooth Basis    | 5  | 8.35   | 0.00    | 11.54  | 11.54  | 8.55   | 0.00    |
| Treated | Marginal tooth Cusp     | 5  | 3.90   | 0.00    | 0.00   | 0.00   | 3.64   | 0.00    |
| Treated | Marginal tooth Stylus   | 5  | 0.00   | -100.00 | 11.43  | -74.29 | -0.05  | -100.00 |
| Treated | Central tooth Cusp      | 6  | 0.59   | 0.00    | 16.00  | 16.00  | 0.61   | 0.00    |
| Treated | Central tooth Stylus    | 6  | 0.21   | 0.00    | 0.00   | 0.00   | 0.24   | 0.00    |
| Treated | Lateral tooth I Cusp    | 6  | -1.21  | 0.00    | 0.00   | 0.00   | -0.30  | 0.00    |
| Treated | Lateral tooth I Stylus  | 6  | 0.60   | 0.00    | 0.00   | 0.00   | 0.60   | 0.00    |
| Treated | Lateral tooth II Basis  | 6  | 9.93   | 18.31   | 0.00   | 17.57  | 4.98   | 0.00    |
| Treated | Lateral tooth II Cusp   | 6  | 3.41   | 0.47    | -28.33 | -0.06  | 0.86   | 0.00    |
| Treated | Lateral tooth II Stylus | 6  | 1.60   | 1.57    | 1.44   | 1.66   | 1.56   | 0.00    |
| Treated | Marginal tooth Basis    | 6  | -4.09  | 0.00    | -11.54 | -11.54 | -4.24  | 0.00    |
| Treated | Marginal tooth Cusp     | 6  | 2.76   | 0.00    | 0.00   | 0.00   | 2.53   | 0.00    |
| Treated | Marginal tooth Stylus   | 6  | 6.73   | 0.00    | -11.43 | -11.43 | 5.44   | 0.00    |
| Treated | Central tooth Cusp      | 7  | 0.07   | 0.00    | 0.00   | 0.00   | 0.07   | 0.00    |
| Treated | Central tooth Stylus    | 7  | 0.83   | 0.00    | 0.00   | 0.00   | 0.85   | 0.00    |
| Treated | Lateral tooth I Cusp    | 7  | 0.30   | 0.00    | 0.00   | 0.00   | 0.07   | 0.00    |
| Treated | Lateral tooth I Stylus  | 7  | 0.30   | 100.00  | 0.00   | 46.43  | 0.35   | 0.00    |
| Treated | Lateral tooth II Basis  | 7  | 8.81   | 9.86    | 29.63  | 31.08  | 4.46   | 0.00    |
| Treated | Lateral tooth II Cusp   | 7  | 2.07   | 5.81    | -23.33 | 5.36   | 2.00   | 0.00    |
| Treated | Lateral tooth II Stylus | 7  | 4.01   | 1.08    | -2.88  | 0.65   | 4.00   | 0.00    |
| Treated | Marginal tooth Basis    | 7  | 7.10   | 0.00    | 0.00   | 0.00   | 7.36   | 0.00    |
| Treated | Marginal tooth Cusp     | 7  | 0.95   | 0.00    | 0.00   | 0.00   | 6.66   | 0.00    |
| Treated | Marginal tooth Stylus   | 7  | 0.10   | 0.00    | 0.00   | 0.00   | 0.10   | 0.00    |
| Treated | Central tooth Cusp      | 8  | 0.00   | 0.00    | 0.00   | 0.00   | 0.06   | 0.00    |
| Treated | Central tooth Stylus    | 8  | 0.07   | 0.00    | -18.00 | -18.00 | -0.68  | 0.00    |
| Treated | Lateral tooth I Cusp    | 8  | 0.45   | 0.00    | 0.00   | 8.33   | -0.51  | 28.57   |
| Treated | Lateral tooth I Stylus  | 8  | 0.60   | -100.00 | 0.00   | -46.43 | 0.61   | 0.00    |
| Treated | Lateral tooth II Basis  | 8  | 5.10   | -9.86   | 25.93  | 9.46   | 5.54   | 0.00    |
| Treated | Lateral tooth II Cusp   | 8  | 4.26   | 8.24    | 0.00   | 8.23   | 4.10   | 0.00    |
| Treated | Lateral tooth II Stylus | 8  | 1.28   | -0.98   | -3.60  | -1.39  | 1.32   | 0.00    |
| Treated | Marginal tooth Basis    | 8  | 5.15   | 0.00    | 0.00   | 0.00   | 5.41   | 0.00    |
| Treated | Marginal tooth Cusp     | 8  | 3.23   | 0.00    | 0.00   | 0.00   | 4.18   | 0.00    |
| Treated | Marginal tooth Stylus   | 8  | 4.12   | 0.00    | 8.57   | 8.57   | 3.23   | 0.00    |
| Treated | Central tooth Cusp      | 9  | -0.66  | 0.00    | 0.00   | 0.00   | 0.51   | 0.00    |
| Treated | Central tooth Stylus    | 9  | -0.93  | 0.00    | 0.00   | 0.00   | -0.97  | 0.00    |
| Treated | Lateral tooth I Cusp    | 9  | -0.53  | 100.00  | 0.00   | 20.83  | -3.98  | -28.57  |
| Treated | Lateral tooth I Stylus  | 9  | -0.70  | 0.00    | 0.00   | 0.00   | -0.78  | 0.00    |
| Treated | Lateral tooth II Basis  | 9  | -13.82 | -5.63   | -55.56 | -45.95 | 4.09   | 0.00    |
| Treated | Lateral tooth II Cusp   | 9  | 1.58   | 1.34    | 0.00   | 1.34   | 1.53   | 0.00    |
| Treated | Lateral tooth II Stylus | 9  | 5.29   | 0.10    | 0.00   | 0.09   | 5.29   | 0.00    |
| Treated | Marginal tooth Basis    | 9  | -3.02  | 0.00    | 0.00   | 0.00   | -3.56  | 0.00    |
| Treated | Marginal tooth Cusp     | 9  | 6.18   | 0.00    | 0.00   | 0.00   | 5.79   | 0.00    |
| Treated | Marginal tooth Stylus   | 9  | 3.02   | 0.00    | -8.57  | -8.57  | 2.47   | 0.00    |
| Treated | Central tooth Cusp      | 10 | 0.51   | 0.00    | 0.00   | 0.00   | 0.20   | 0.00    |
| Treated | Central tooth Stylus    | 10 | 0.21   | 0.00    | 15.49  | 13.10  | 0.29   | 0.00    |
| Treated | Lateral tooth I Cusp    | 10 | -3.77  | -100.00 | 0.00   | -29.17 | 1.09   | 0.00    |
| Treated | Lateral tooth I Stylus  | 10 | 0.60   | 76.92   | 0.00   | 35.71  | 0.71   | 0.00    |
| Treated | Lateral tooth II Basis  | 10 | 0.00   | 28.17   | 24.07  | 48.65  | 3.11   | 18.75   |
| Treated | Lateral tooth II Cusp   | 10 | 3.50   | 2.22    | 0.00   | 2.21   | 3.41   | 0.00    |
| Treated | Lateral tooth II Stylus | 10 | 4.17   | 4.11    | 0.00   | 3.88   | 4.17   | 0.00    |
| Treated | Marginal tooth Basis    | 10 | -17.76 | 0.00    | 0.00   | 0.00   | -18.13 | 0.00    |
| Treated | Marginal tooth Cusp     | 10 | 7.60   | 0.00    | 0.00   | 0.00   | 6.50   | 0.00    |
| Treated | Marginal tooth Stylus   | 10 | 1.21   | 0.00    | 0.00   | 0.00   | 0.95   | 0.00    |
| Treated | Central tooth Cusp      | 11 | 0.15   | 0.00    | 0.00   | 0.00   | 0.33   | 0.00    |
| Treated | Central tooth Stylus    | 11 | 0.72   | 0.00    | -2.82  | 1.19   | 0.74   | 8.57    |
| Treated | Lateral tooth I Cusp    | 11 | 1.06   | 85.71   | 0.00   | 25.00  | -1.01  | 0.00    |

|         |                         |    |       |        |         |         |       |         |
|---------|-------------------------|----|-------|--------|---------|---------|-------|---------|
| Treated | Lateral tooth I Stylus  | 11 | 0.30  | -76.92 | 0.00    | -35.71  | 0.26  | 0.00    |
| Treated | Lateral tooth II Basis  | 11 | -3.71 | -26.76 | 64.81   | 16.22   | 2.04  | -18.75  |
| Treated | Lateral tooth II Cusp   | 11 | 0.97  | 4.03   | 0.00    | 4.02    | 0.93  | 0.00    |
| Treated | Lateral tooth II Stylus | 11 | 1.36  | -0.49  | 0.00    | -0.46   | 1.38  | 0.00    |
| Treated | Marginal tooth Basis    | 11 | 2.84  | 0.00   | 0.00    | 0.00    | 3.10  | 0.00    |
| Treated | Marginal tooth Cusp     | 11 | 5.99  | 0.00   | 0.00    | 0.00    | 6.35  | 0.00    |
| Treated | Marginal tooth Stylus   | 11 | 1.01  | 0.00   | 20.00   | 20.00   | 0.82  | 0.00    |
| Treated | Central tooth Cusp      | 12 | 0.37  | 0.00   | 8.00    | 8.00    | 0.42  | 0.00    |
| Treated | Central tooth Stylus    | 12 | -0.21 | 0.00   | 9.86    | 4.76    | -0.21 | -8.57   |
| Treated | Lateral tooth I Cusp    | 12 | -0.98 | -85.71 | 0.00    | -25.00  | -0.38 | 0.00    |
| Treated | Lateral tooth II Basis  | 12 | -0.81 | 0.00   | 0.00    | 0.00    | -0.86 | 0.00    |
| Treated | Lateral tooth II Cusp   | 12 | 2.32  | -9.86  | -88.89  | -72.97  | 8.94  | 0.00    |
| Treated | Lateral tooth II Stylus | 12 | 4.26  | 5.59   | 56.67   | 6.64    | 4.12  | 0.00    |
| Treated | Marginal tooth Basis    | 12 | 5.21  | -3.91  | 0.00    | -3.69   | 5.76  | 0.00    |
| Treated | Marginal tooth Cusp     | 12 | 3.73  | 0.00   | 0.00    | 0.00    | 3.73  | 0.00    |
| Treated | Marginal tooth Stylus   | 12 | 8.56  | 0.00   | 73.53   | 60.98   | 8.07  | 0.00    |
| Treated | Central tooth Cusp      | 13 | 0.44  | 0.00   | -8.00   | -8.00   | -0.42 | 0.00    |
| Treated | Central tooth Stylus    | 13 | -0.62 | 0.00   | -22.54  | -19.05  | -0.65 | 0.00    |
| Treated | Lateral tooth I Cusp    | 13 | -0.38 | 0.00   | 0.00    | 0.00    | 0.17  | 0.00    |
| Treated | Lateral tooth I Stylus  | 13 | 0.50  | 0.00   | 0.00    | 7.14    | 0.51  | 14.29   |
| Treated | Lateral tooth II Basis  | 13 | 2.04  | 1.41   | 0.00    | 1.35    | 14.64 | 0.00    |
| Treated | Lateral tooth II Cusp   | 13 | 3.35  | 0.87   | 43.33   | 1.68    | 3.22  | 0.00    |
| Treated | Lateral tooth II Stylus | 13 | 8.26  | 4.01   | 0.00    | 3.97    | 7.71  | 66.67   |
| Treated | Marginal tooth Basis    | 13 | 0.00  | 0.00   | 0.00    | 0.00    | 0.15  | 0.00    |
| Treated | Marginal tooth Cusp     | 13 | 7.13  | 0.00   | -73.53  | -60.98  | 8.19  | 0.00    |
| Treated | Marginal tooth Stylus   | 13 | 8.44  | 0.00   | -31.43  | -28.57  | 6.80  | 50.00   |
| Treated | Central tooth Cusp      | 14 | -0.29 | 0.00   | 0.00    | 0.00    | 5.13  | 0.00    |
| Treated | Central tooth Stylus    | 14 | 0.10  | 0.00   | 0.00    | 0.00    | 0.09  | 0.00    |
| Treated | Lateral tooth I Cusp    | 14 | 0.15  | 0.00   | 35.29   | 33.33   | 4.95  | 28.57   |
| Treated | Lateral tooth I Stylus  | 14 | 0.00  | 0.00   | 100.00  | 92.86   | 0.00  | 71.43   |
| Treated | Lateral tooth II Basis  | 14 | 7.88  | 4.23   | 0.00    | 4.05    | 9.76  | 0.00    |
| Treated | Lateral tooth II Cusp   | 14 | 1.46  | 2.06   | -53.33  | 1.06    | 1.42  | 0.00    |
| Treated | Lateral tooth II Stylus | 14 | 2.97  | -0.20  | 41.01   | 5.17    | 3.00  | 0.00    |
| Treated | Marginal tooth Basis    | 14 | 2.49  | 0.00   | 0.00    | 0.00    | 1.69  | 0.00    |
| Treated | Marginal tooth Cusp     | 14 | 7.22  | 0.00   | 44.12   | 39.02   | 9.85  | 100.00  |
| Treated | Marginal tooth Stylus   | 14 | 10.75 | 0.00   | 8.57    | 5.71    | 8.57  | -50.00  |
| Treated | Central tooth Cusp      | 15 | 5.12  | 0.00   | 0.00    | 0.00    | 6.88  | 100.00  |
| Treated | Central tooth Stylus    | 15 | 7.14  | 20.00  | 0.00    | 8.33    | 7.37  | 0.00    |
| Treated | Lateral tooth I Cusp    | 15 | 4.75  | 0.00   | -35.29  | -33.33  | 6.64  | -28.57  |
| Treated | Lateral tooth I Stylus  | 15 | 7.65  | 0.00   | -100.00 | -100.00 | 7.93  | -85.71  |
| Treated | Lateral tooth II Basis  | 15 | -6.96 | 52.11  | 0.00    | 50.00   | 0.98  | 0.00    |
| Treated | Lateral tooth II Cusp   | 15 | 5.08  | 9.86   | -46.67  | 8.98    | 4.90  | 0.00    |
| Treated | Lateral tooth II Stylus | 15 | 7.38  | 3.13   | 58.99   | 10.34   | 7.36  | -33.33  |
| Treated | Marginal tooth Basis    | 15 | 3.55  | 0.00   | 34.62   | 34.62   | 4.54  | 0.00    |
| Treated | Marginal tooth Cusp     | 15 | 4.85  | 0.00   | -35.29  | -31.71  | 4.89  | -100.00 |
| Treated | Marginal tooth Stylus   | 15 | 4.32  | 0.00   | 31.43   | 31.43   | 3.45  | 0.00    |
| Treated | Central tooth Cusp      | 16 | 6.80  | 0.00   | 0.00    | 10.00   | 5.75  | -100.00 |
| Treated | Central tooth Stylus    | 16 | -0.83 | -20.00 | 0.00    | -8.33   | -0.78 | 0.00    |
| Treated | Lateral tooth I Cusp    | 16 | 6.34  | 14.29  | 0.00    | 4.17    | 6.73  | 0.00    |
| Treated | Lateral tooth I Stylus  | 16 | 0.30  | 0.00   | 0.00    | 0.00    | 0.58  | 0.00    |
| Treated | Lateral tooth II Basis  | 16 | -4.64 | -23.94 | 0.00    | -22.97  | 3.35  | 0.00    |
| Treated | Lateral tooth II Cusp   | 16 | 3.26  | -3.18  | 0.00    | -3.18   | 2.34  | 0.00    |
| Treated | Lateral tooth II Stylus | 16 | 6.26  | -2.84  | -94.96  | -14.96  | 6.23  | -33.33  |
| Treated | Marginal tooth Basis    | 16 | 7.10  | 0.00   | -34.62  | -34.62  | 7.42  | 0.00    |
| Treated | Marginal tooth Cusp     | 16 | 2.66  | 0.00   | -8.82   | -7.32   | 2.68  | 0.00    |
| Treated | Marginal tooth Stylus   | 16 | 4.12  | 0.00   | -34.29  | -34.29  | 3.31  | 0.00    |
| Treated | Central tooth Cusp      | 17 | 5.71  | 0.00   | 0.00    | -10.00  | 6.71  | 0.00    |
| Treated | Central tooth Stylus    | 17 | 9.72  | 0.00   | 0.00    | 0.00    | 10.06 | 0.00    |
| Treated | Lateral tooth I Cusp    | 17 | 6.49  | -14.29 | 0.00    | -4.17   | 6.81  | 0.00    |
| Treated | Lateral tooth I Stylus  | 17 | 10.57 | 0.00   | 0.00    | 0.00    | 11.23 | 0.00    |
| Treated | Lateral tooth II Basis  | 17 | 9.37  | -33.80 | 0.00    | -29.73  | 1.04  | 12.50   |
| Treated | Lateral tooth II Cusp   | 17 | 1.40  | 7.46   | 0.00    | 7.45    | 2.18  | 0.00    |
| Treated | Lateral tooth II Stylus | 17 | 6.26  | 0.20   | -5.04   | -0.46   | 6.28  | 0.00    |
| Treated | Marginal tooth Basis    | 17 | 3.20  | 0.00   | 0.00    | 0.00    | 3.24  | 0.00    |
| Treated | Marginal tooth Cusp     | 17 | 4.09  | 0.00   | 0.00    | 0.00    | 4.10  | 0.00    |
| Treated | Marginal tooth Stylus   | 17 | 4.22  | 0.00   | 25.71   | 25.71   | 3.37  | 0.00    |
| Treated | Central tooth Cusp      | 18 | 6.66  | 0.00   | 0.00    | 0.00    | 7.35  | 0.00    |
| Treated | Central tooth Stylus    | 18 | 4.65  | 0.00   | 0.00    | 0.00    | 4.83  | 0.00    |
| Treated | Lateral tooth I Cusp    | 18 | 6.57  | 0.00   | 0.00    | 0.00    | 5.65  | 0.00    |
| Treated | Lateral tooth I Stylus  | 18 | 7.55  | 0.00   | 0.00    | 50.00   | 7.96  | 100.00  |
| Treated | Lateral tooth II Basis  | 18 | 3.25  | 25.35  | 0.00    | 21.62   | 5.86  | -12.50  |
| Treated | Lateral tooth II Cusp   | 18 | 1.70  | -7.96  | 0.00    | -7.95   | 1.64  | 0.00    |
| Treated | Lateral tooth II Stylus | 18 | 5.29  | 1.86   | 0.00    | 1.75    | 5.28  | 0.00    |
| Treated | Marginal tooth Basis    | 18 | -1.07 | 0.00   | 0.00    | 0.00    | -1.02 | 0.00    |
| Treated | Marginal tooth Cusp     | 18 | 4.18  | 0.00   | 0.00    | 0.00    | 4.13  | 0.00    |
| Treated | Marginal tooth Stylus   | 18 | 4.22  | 0.00   | -31.43  | -31.43  | 3.42  | 0.00    |
| Treated | Central tooth Cusp      | 19 | 7.32  | 0.00   | 12.00   | 12.00   | -0.48 | 0.00    |
| Treated | Central tooth Stylus    | 19 | 4.34  | 0.00   | 0.00    | 0.00    | 4.57  | 0.00    |
| Treated | Lateral tooth I Cusp    | 19 | 5.36  | 0.00   | 0.00    | 0.00    | 0.97  | 0.00    |
| Treated | Lateral tooth I Stylus  | 19 | -0.70 | 0.00   | 0.00    | -50.00  | -0.88 | -100.00 |
| Treated | Lateral tooth II Basis  | 19 | 2.41  | -25.35 | 25.93   | 16.22   | -0.46 | 100.00  |

|         |                         |    |        |        |         |         |        |         |
|---------|-------------------------|----|--------|--------|---------|---------|--------|---------|
| Treated | Lateral tooth II Cusp   | 19 | 1.67   | -2.62  | 0.00    | -2.62   | 1.64   | 0.00    |
| Treated | Lateral tooth II Stylus | 19 | 3.13   | 2.74   | 0.00    | 2.59    | 3.14   | 0.00    |
| Treated | Marginal tooth Basis    | 19 | 3.20   | 0.00   | 53.85   | 53.85   | 3.28   | 0.00    |
| Treated | Marginal tooth Cusp     | 19 | 4.18   | 0.00   | 14.71   | 12.20   | 4.17   | 0.00    |
| Treated | Marginal tooth Stylus   | 19 | -16.88 | 0.00   | 0.00    | 0.00    | 3.48   | 0.00    |
| Treated | Central tooth Cusp      | 20 | -0.51  | 0.00   | -12.00  | -12.00  | 9.18   | 0.00    |
| Treated | Central tooth Stylus    | 20 | 3.41   | 0.00   | 0.00    | 0.00    | 3.53   | 0.00    |
| Treated | Lateral tooth I Cusp    | 20 | 0.98   | 28.57  | 0.00    | 8.33    | 7.52   | 0.00    |
| Treated | Lateral tooth I Stylus  | 20 | -2.92  | 0.00   | 0.00    | 0.00    | -2.96  | 0.00    |
| Treated | Lateral tooth II Basis  | 20 | 2.50   | 22.54  | -25.93  | -18.92  | 0.62   | -100.00 |
| Treated | Lateral tooth II Cusp   | 20 | 4.20   | 10.05  | 0.00    | 10.04   | 4.05   | 0.00    |
| Treated | Lateral tooth II Stylus | 20 | 6.98   | 1.66   | 0.00    | 1.57    | 6.98   | 0.00    |
| Treated | Marginal tooth Basis    | 20 | 3.20   | 0.00   | -53.85  | -53.85  | 3.31   | 0.00    |
| Treated | Marginal tooth Cusp     | 20 | -19.20 | 0.00   | -14.71  | -12.20  | -19.17 | 0.00    |
| Treated | Marginal tooth Stylus   | 20 | 2.11   | 0.00   | 0.00    | 0.00    | 3.54   | 0.00    |
| Treated | Central tooth Cusp      | 21 | 9.14   | 0.00   | 0.00    | 0.00    | 4.44   | 0.00    |
| Treated | Central tooth Stylus    | 21 | 5.58   | 0.00   | 0.00    | 0.00    | 5.89   | 0.00    |
| Treated | Lateral tooth I Cusp    | 21 | 7.17   | -28.57 | 100.00  | 91.67   | 7.05   | 100.00  |
| Treated | Lateral tooth I Stylus  | 21 | 3.63   | 0.00   | 0.00    | 0.00    | 3.80   | 0.00    |
| Treated | Lateral tooth II Basis  | 21 | -4.82  | 2.82   | 0.00    | 2.70    | 2.89   | 0.00    |
| Treated | Lateral tooth II Cusp   | 21 | 1.19   | 0.25   | 0.00    | 0.25    | 1.14   | 0.00    |
| Treated | Lateral tooth II Stylus | 21 | 6.17   | 13.11  | 0.00    | 12.37   | 4.82   | 0.00    |
| Treated | Marginal tooth Basis    | 21 | 3.73   | 0.00   | 0.00    | 0.00    | 3.34   | 0.00    |
| Treated | Marginal tooth Cusp     | 21 | 3.42   | 0.00   | 0.00    | 0.00    | 3.39   | 0.00    |
| Treated | Marginal tooth Stylus   | 21 | -3.82  | 21.43  | 0.00    | 17.14   | 3.60   | 0.00    |
| Treated | Central tooth Cusp      | 22 | 4.39   | 0.00   | 0.00    | 0.00    | 5.82   | 0.00    |
| Treated | Central tooth Stylus    | 22 | 6.41   | 0.00   | 0.00    | 0.00    | 6.65   | 0.00    |
| Treated | Lateral tooth I Cusp    | 22 | 7.77   | 0.00   | -100.00 | -100.00 | 6.08   | -100.00 |
| Treated | Lateral tooth I Stylus  | 22 | 8.56   | 0.00   | 0.00    | 14.29   | 9.09   | 28.57   |
| Treated | Lateral tooth II Basis  | 22 | 7.51   | 0.00   | 0.00    | 0.00    | 0.88   | 0.00    |
| Treated | Lateral tooth II Cusp   | 22 | 2.07   | 7.33   | 0.00    | 7.33    | 2.01   | 0.00    |
| Treated | Lateral tooth II Stylus | 22 | 0.08   | 36.11  | 0.00    | 34.07   | 1.41   | 0.00    |
| Treated | Marginal tooth Basis    | 22 | 4.09   | 0.00   | 65.38   | 65.38   | 3.38   | 0.00    |
| Treated | Marginal tooth Cusp     | 22 | 3.42   | 0.00   | 20.59   | 17.07   | 3.43   | 0.00    |
| Treated | Marginal tooth Stylus   | 22 | 0.80   | -21.43 | 31.43   | 14.29   | 2.34   | 0.00    |
| Treated | Central tooth Cusp      | 23 | 10.39  | 0.00   | 0.00    | 0.00    | 4.64   | 0.00    |
| Treated | Central tooth Stylus    | 23 | 32.68  | 37.14  | 100.00  | 100.00  | 9.33   | 0.00    |
| Treated | Lateral tooth I Cusp    | 23 | 4.83   | 0.00   | 0.00    | 0.00    | 1.45   | 0.00    |
| Treated | Lateral tooth I Stylus  | 23 | 5.84   | 0.00   | 0.00    | -14.29  | 6.22   | -28.57  |
| Treated | Lateral tooth II Basis  | 23 | 0.00   | 32.39  | 0.00    | 31.08   | -0.35  | 0.00    |
| Treated | Lateral tooth II Cusp   | 23 | 3.74   | 6.77   | 0.00    | 6.76    | 3.61   | 0.00    |
| Treated | Lateral tooth II Stylus | 23 | 0.80   | 2.15   | 0.00    | 2.03    | 0.81   | 0.00    |
| Treated | Marginal tooth Basis    | 23 | 8.35   | 0.00   | -65.38  | -65.38  | 9.25   | 0.00    |
| Treated | Marginal tooth Cusp     | 23 | 5.32   | 0.00   | -20.59  | -17.07  | 5.33   | 0.00    |
| Treated | Marginal tooth Stylus   | 23 | 2.71   | 0.00   | -17.14  | -17.14  | 11.77  | 0.00    |
| Treated | Central tooth Stylus    | 24 | -23.89 | -37.14 | -100.00 | -100.00 | -0.19  | 0.00    |
| Treated | Lateral tooth I Cusp    | 24 | 1.36   | 0.00   | 0.00    | 0.00    | 0.39   | 0.00    |
| Treated | Lateral tooth I Stylus  | 24 | 3.22   | 0.00   | 0.00    | 0.00    | 3.42   | 0.00    |
| Treated | Lateral tooth II Basis  | 24 | 3.43   | 22.54  | 12.96   | 31.08   | 2.58   | 0.00    |
| Treated | Lateral tooth II Cusp   | 24 | 2.92   | 4.74   | 0.00    | 4.74    | 2.84   | 0.00    |
| Treated | Lateral tooth II Stylus | 24 | 4.49   | 8.71   | 0.00    | 8.22    | 4.44   | 0.00    |
| Treated | Marginal tooth Basis    | 24 | -1.60  | 0.00   | 0.00    | 0.00    | 0.54   | 0.00    |
| Treated | Marginal tooth Cusp     | 24 | 5.04   | 0.00   | 0.00    | 0.00    | 5.10   | 0.00    |
| Treated | Marginal tooth Stylus   | 24 | -1.41  | 0.00   | -14.29  | -14.29  | -2.97  | 0.00    |
| Treated | Central tooth Cusp      | 25 | 2.49   | 0.00   | 0.00    | 0.00    | 0.34   | 0.00    |
| Treated | Central tooth Stylus    | 25 | 11.38  | 0.00   | 84.51   | 71.43   | 8.99   | 0.00    |
| Treated | Lateral tooth I Cusp    | 25 | 1.51   | 0.00   | 76.47   | 54.17   | 7.27   | 0.00    |
| Treated | Lateral tooth I Stylus  | 25 | 10.17  | 0.00   | 0.00    | 0.00    | 9.34   | 0.00    |
| Treated | Lateral tooth II Basis  | 25 | 0.56   | -76.06 | 70.37   | -21.62  | 0.32   | 0.00    |
| Treated | Lateral tooth II Cusp   | 25 | 3.53   | 17.04  | 0.00    | 17.02   | 3.40   | 0.00    |
| Treated | Lateral tooth II Stylus | 25 | 4.41   | -22.50 | 0.00    | -21.24  | 4.45   | 0.00    |
| Treated | Marginal tooth Basis    | 25 | -12.26 | 0.00   | 0.00    | 0.00    | -12.76 | 0.00    |
| Treated | Marginal tooth Cusp     | 25 | 2.09   | 0.00   | 23.53   | 19.51   | 2.05   | 0.00    |
| Treated | Marginal tooth Stylus   | 25 | 2.51   | 0.00   | 0.00    | 0.00    | 4.81   | 0.00    |
| Treated | Central tooth Cusp      | 26 | 3.37   | 0.00   | 0.00    | 0.00    | 3.38   | 0.00    |
| Treated | Central tooth Stylus    | 26 | 1.34   | 0.00   | -84.51  | -71.43  | -4.27  | 0.00    |
| Treated | Lateral tooth I Cusp    | 26 | 7.02   | 0.00   | -76.47  | -54.17  | 6.42   | 0.00    |
| Treated | Lateral tooth I Stylus  | 26 | -2.42  | 0.00   | 0.00    | 0.00    | -4.06  | 0.00    |
| Treated | Lateral tooth II Basis  | 26 | -3.62  | 42.25  | -83.33  | -20.27  | 0.69   | 0.00    |
| Treated | Lateral tooth II Cusp   | 26 | 1.22   | 4.53   | 0.00    | 4.52    | 0.24   | 0.00    |
| Treated | Lateral tooth II Stylus | 26 | -8.02  | 50.39  | 0.00    | 47.55   | -8.03  | 0.00    |
| Treated | Marginal tooth Basis    | 26 | 7.10   | 0.00   | 0.00    | 0.00    | 8.99   | 0.00    |
| Treated | Marginal tooth Cusp     | 26 | 0.57   | 0.00   | -23.53  | -19.51  | 0.58   | 0.00    |
| Treated | Marginal tooth Stylus   | 26 | -3.62  | 0.00   | 0.00    | 0.00    | 0.93   | 0.00    |
| Treated | Central tooth Cusp      | 27 | 4.75   | 0.00   | 0.00    | 0.00    | 6.97   | 0.00    |
| Treated | Central tooth Stylus    | 27 | 3.52   | 0.00   | 5.63    | 4.76    | 9.31   | 0.00    |
| Treated | Lateral tooth I Cusp    | 27 | 4.98   | 0.00   | 0.00    | 0.00    | -0.81  | 0.00    |
| Treated | Lateral tooth I Stylus  | 27 | 1.91   | 0.00   | 0.00    | 0.00    | 5.03   | 0.00    |
| Treated | Lateral tooth II Basis  | 27 | 11.60  | 0.00   | 0.00    | 0.00    | 0.50   | 0.00    |
| Treated | Lateral tooth II Cusp   | 27 | 8.55   | -3.00  | 41.67   | -2.15   | 9.59   | 100.00  |
| Treated | Lateral tooth II Stylus | 27 | -0.48  | -8.32  | 0.00    | -7.85   | -0.51  | 0.00    |
| Treated | Marginal tooth Basis    | 27 | -6.22  | 0.00   | 0.00    | 0.00    | -8.00  | 0.00    |

|         |                         |    |        |        |         |        |        |         |
|---------|-------------------------|----|--------|--------|---------|--------|--------|---------|
| Treated | Marginal tooth Cusp     | 27 | -5.51  | 0.00   | 32.35   | 26.83  | -5.56  | 0.00    |
| Treated | Marginal tooth Stylus   | 27 | 0.00   | 0.00   | 0.00    | 0.00   | 0.93   | 0.00    |
| Treated | Central tooth Cusp      | 28 | 2.71   | 0.00   | 0.00    | 0.00   | 2.75   | 0.00    |
| Treated | Central tooth Stylus    | 28 | -4.65  | 0.00   | -5.63   | -4.76  | -4.54  | 0.00    |
| Treated | Lateral tooth I Cusp    | 28 | -0.75  | 0.00   | 0.00    | 0.00   | 6.76   | 0.00    |
| Treated | Lateral tooth I Stylus  | 28 | 0.30   | 0.00   | 0.00    | 0.00   | 0.35   | 0.00    |
| Treated | Lateral tooth II Basis  | 28 | 11.69  | 16.90  | 0.00    | 22.97  | -11.50 | 25.00   |
| Treated | Lateral tooth II Cusp   | 28 | 1.89   | 11.49  | 33.33   | 12.03  | 1.56   | -100.00 |
| Treated | Lateral tooth II Stylus | 28 | -8.26  | 6.07   | 15.83   | 7.76   | -8.26  | 0.00    |
| Treated | Marginal tooth Basis    | 28 | -3.73  | 0.00   | 0.00    | 0.00   | -4.06  | 0.00    |
| Treated | Marginal tooth Cusp     | 28 | -4.75  | 0.00   | 11.76   | 9.76   | -4.76  | 0.00    |
| Treated | Marginal tooth Stylus   | 28 | -0.80  | 0.00   | 0.00    | 0.00   | -9.15  | 0.00    |
| Treated | Central tooth Cusp      | 29 | 6.88   | 0.00   | 16.00   | 16.00  | 6.88   | 0.00    |
| Treated | Central tooth Stylus    | 29 | 6.20   | 37.14  | 0.00    | 15.48  | 9.03   | 0.00    |
| Treated | Lateral tooth I Cusp    | 29 | 7.09   | 0.00   | 0.00    | 0.00   | 0.50   | 0.00    |
| Treated | Lateral tooth I Stylus  | 29 | 4.03   | 0.00   | 0.00    | 0.00   | 4.20   | 0.00    |
| Treated | Lateral tooth II Basis  | 29 | -6.68  | -9.86  | 0.00    | -16.22 | -12.16 | -25.00  |
| Treated | Lateral tooth II Cusp   | 29 | 7.82   | 0.56   | -58.33  | -0.53  | 7.91   | 0.00    |
| Treated | Lateral tooth II Stylus | 29 | 3.21   | -20.74 | 83.45   | -8.86  | 3.23   | 0.00    |
| Treated | Marginal tooth Basis    | 29 | 8.53   | 0.00   | 0.00    | 0.00   | 5.19   | 0.00    |
| Treated | Marginal tooth Cusp     | 29 | 1.81   | 0.00   | 55.88   | 46.34  | 1.88   | 0.00    |
| Treated | Marginal tooth Stylus   | 29 | 7.94   | 0.00   | 0.00    | 0.00   | 3.52   | 0.00    |
| Treated | Central tooth Cusp      | 30 | 0.44   | 0.00   | -16.00  | -16.00 | 0.45   | 0.00    |
| Treated | Central tooth Stylus    | 30 | -3.31  | -37.14 | 0.00    | -15.48 | -3.45  | 0.00    |
| Treated | Lateral tooth I Cusp    | 30 | 3.55   | 0.00   | 0.00    | 0.00   | 6.85   | 0.00    |
| Treated | Lateral tooth I Stylus  | 30 | -3.02  | 0.00   | 0.00    | 0.00   | -3.23  | 0.00    |
| Treated | Lateral tooth II Basis  | 30 | -3.90  | 26.76  | 0.00    | 44.59  | -10.81 | 81.25   |
| Treated | Lateral tooth II Cusp   | 30 | -1.49  | -13.23 | 31.67   | -12.66 | 1.77   | 0.00    |
| Treated | Lateral tooth II Stylus | 30 | -8.02  | 9.88   | -67.63  | 0.65   | -8.04  | 0.00    |
| Treated | Marginal tooth Basis    | 30 | 9.06   | 0.00   | 0.00    | 0.00   | 7.12   | 0.00    |
| Treated | Marginal tooth Cusp     | 30 | 0.29   | 0.00   | -100.00 | -82.93 | -1.29  | 0.00    |
| Treated | Marginal tooth Stylus   | 30 | 8.84   | 0.00   | 0.00    | 0.00   | -24.09 | 0.00    |
| Treated | Central tooth Cusp      | 31 | 1.02   | 0.00   | 0.00    | 0.00   | 1.01   | 0.00    |
| Treated | Central tooth Stylus    | 31 | 3.00   | 0.00   | 0.00    | 0.00   | 3.12   | 0.00    |
| Treated | Lateral tooth I Cusp    | 31 | 6.87   | 0.00   | 0.00    | 0.00   | 0.20   | 0.00    |
| Treated | Lateral tooth I Stylus  | 31 | 8.26   | 0.00   | 0.00    | 0.00   | 8.77   | 0.00    |
| Treated | Lateral tooth II Basis  | 31 | 12.62  | -5.63  | 0.00    | -21.62 | 4.08   | -68.75  |
| Treated | Lateral tooth II Cusp   | 31 | -1.40  | 6.43   | -48.33  | 5.55   | 2.37   | 0.00    |
| Treated | Lateral tooth II Stylus | 31 | 7.54   | 8.32   | 47.48   | 13.94  | 6.32   | 0.00    |
| Treated | Marginal tooth Basis    | 31 | -8.17  | 0.00   | 0.00    | 0.00   | -8.08  | 0.00    |
| Treated | Marginal tooth Cusp     | 31 | 1.33   | 0.00   | 64.71   | 53.66  | 2.86   | 0.00    |
| Treated | Marginal tooth Stylus   | 31 | -2.61  | 0.00   | 0.00    | 0.00   | -0.73  | 0.00    |
| Treated | Central tooth Cusp      | 32 | 3.80   | 0.00   | 0.00    | 0.00   | 3.89   | 0.00    |
| Treated | Central tooth Stylus    | 32 | 6.51   | 0.00   | 0.00    | 0.00   | 4.26   | 0.00    |
| Treated | Lateral tooth I Cusp    | 32 | 0.15   | 0.00   | 0.00    | 0.00   | -0.15  | 0.00    |
| Treated | Lateral tooth I Stylus  | 32 | 8.16   | 0.00   | 0.00    | 0.00   | 4.69   | 0.00    |
| Treated | Lateral tooth II Basis  | 32 | -12.80 | 21.13  | 0.00    | 17.57  | -3.69  | -12.50  |
| Treated | Lateral tooth II Cusp   | 32 | -7.36  | -2.09  | 0.00    | -2.09  | -9.28  | 0.00    |
| Treated | Lateral tooth II Stylus | 32 | -2.89  | 2.35   | -25.18  | -1.02  | -3.42  | 0.00    |
| Treated | Marginal tooth Basis    | 32 | -6.75  | 0.00   | 0.00    | 0.00   | -8.22  | 0.00    |
| Treated | Marginal tooth Cusp     | 32 | -2.09  | 0.00   | -41.18  | -34.15 | -2.06  | 0.00    |
| Treated | Marginal tooth Stylus   | 32 | 3.42   | 0.00   | 0.00    | 0.00   | 0.13   | 0.00    |
| Treated | Central tooth Cusp      | 33 | -0.22  | 0.00   | 0.00    | 0.00   | -0.23  | 0.00    |
| Treated | Central tooth Stylus    | 33 | -1.14  | 42.86  | 0.00    | 20.24  | -3.78  | 5.71    |
| Treated | Lateral tooth I Cusp    | 33 | -0.15  | 0.00   | 0.00    | 0.00   | -1.55  | 0.00    |
| Treated | Lateral tooth I Stylus  | 33 | -1.21  | 0.00   | 0.00    | 0.00   | -3.50  | 0.00    |
| Treated | Lateral tooth II Basis  | 33 | 7.79   | -66.20 | 0.00    | -63.51 | 5.61   | 0.00    |
| Treated | Lateral tooth II Cusp   | 33 | 8.03   | 3.12   | 0.00    | 3.12   | 9.98   | 0.00    |
| Treated | Lateral tooth II Stylus | 33 | 2.49   | -23.58 | -12.23  | -23.82 | 4.24   | 0.00    |
| Treated | Marginal tooth Basis    | 33 | 12.97  | 0.00   | 0.00    | 0.00   | 6.22   | 0.00    |
| Treated | Marginal tooth Cusp     | 33 | 1.62   | 0.00   | -23.53  | -19.51 | -5.44  | 0.00    |
| Treated | Marginal tooth Stylus   | 33 | 6.33   | 0.00   | 0.00    | 0.00   | 1.18   | 0.00    |
| Treated | Central tooth Cusp      | 34 | 3.95   | 0.00   | 0.00    | 0.00   | -0.21  | 0.00    |
| Treated | Central tooth Stylus    | 34 | 2.79   | -31.43 | 0.00    | -15.48 | 0.24   | -5.71   |
| Treated | Lateral tooth I Cusp    | 34 | -0.30  | 0.00   | 0.00    | 0.00   | -0.72  | 0.00    |
| Treated | Lateral tooth I Stylus  | 34 | 0.50   | 0.00   | 0.00    | 0.00   | 0.96   | 0.00    |
| Treated | Lateral tooth II Basis  | 34 | -1.39  | -22.54 | 0.00    | -21.62 | -1.59  | 0.00    |
| Treated | Lateral tooth II Cusp   | 34 | -2.07  | -1.06  | 0.00    | -1.06  | -8.38  | 0.00    |
| Treated | Lateral tooth II Stylus | 34 | -1.12  | 21.04  | 2.16    | 20.04  | -2.85  | 0.00    |
| Treated | Marginal tooth Basis    | 34 | 5.15   | 0.00   | 0.00    | 0.00   | 5.31   | 0.00    |
| Treated | Marginal tooth Cusp     | 34 | 0.10   | 0.00   | 20.59   | 17.07  | 0.05   | 0.00    |
| Treated | Marginal tooth Stylus   | 34 | 0.60   | 0.00   | 0.00    | 0.00   | 0.47   | 0.00    |
| Treated | Central tooth Cusp      | 35 | -2.34  | 0.00   | 74.00   | 74.00  | -8.60  | 0.00    |
| Treated | Central tooth Stylus    | 35 | -0.72  | -11.43 | 73.24   | 57.14  | -0.73  | 0.00    |
| Treated | Lateral tooth I Cusp    | 35 | 0.15   | 0.00   | 0.00    | 0.00   | 0.97   | 0.00    |
| Treated | Lateral tooth I Stylus  | 35 | -0.70  | 0.00   | 0.00    | 0.00   | -0.74  | 0.00    |
| Treated | Lateral tooth II Basis  | 35 | -1.48  | 2.82   | 0.00    | 2.70   | -0.94  | 0.00    |
| Treated | Lateral tooth II Cusp   | 35 | 8.46   | 2.12   | 0.00    | 2.12   | 10.38  | 0.00    |
| Treated | Lateral tooth II Stylus | 35 | 0.80   | -40.02 | -14.39  | -39.52 | 2.52   | 0.00    |
| Treated | Marginal tooth Basis    | 35 | -2.66  | 0.00   | 0.00    | 0.00   | 5.37   | 0.00    |
| Treated | Marginal tooth Cusp     | 35 | -5.32  | 0.00   | -20.59  | -17.07 | -4.86  | 0.00    |
| Treated | Marginal tooth Stylus   | 35 | 1.11   | 0.00   | 20.00   | 20.00  | 0.83   | 0.00    |

|         |                         |    |        |         |         |         |        |         |
|---------|-------------------------|----|--------|---------|---------|---------|--------|---------|
| Treated | Central tooth Cusp      | 36 | -5.34  | 0.00    | 26.00   | 26.00   | 5.02   | 0.00    |
| Treated | Central tooth Stylus    | 36 | 6.31   | 0.00    | -49.30  | -33.33  | 10.19  | 20.00   |
| Treated | Lateral tooth I Cusp    | 36 | 0.98   | 0.00    | 0.00    | 0.00    | 4.74   | 0.00    |
| Treated | Lateral tooth I Stylus  | 36 | 3.32   | 0.00    | 0.00    | 0.00    | 3.37   | 0.00    |
| Treated | Lateral tooth II Basis  | 36 | 0.00   | 4.23    | 0.00    | 5.41    | -0.01  | 6.25    |
| Treated | Lateral tooth II Cusp   | 36 | -10.89 | -2.43   | 0.00    | -2.43   | -9.72  | 0.00    |
| Treated | Lateral tooth II Stylus | 36 | 4.25   | 13.50   | -24.46  | 9.60    | 4.29   | 0.00    |
| Treated | Marginal tooth Basis    | 36 | 4.26   | 0.00    | 0.00    | 15.38   | -14.92 | 100.00  |
| Treated | Marginal tooth Cusp     | 36 | 1.90   | 0.00    | 0.00    | 0.00    | 1.75   | 0.00    |
| Treated | Marginal tooth Stylus   | 36 | 1.11   | 0.00    | 80.00   | 80.00   | 0.84   | 0.00    |
| Treated | Central tooth Cusp      | 37 | 6.95   | 0.00    | -100.00 | -100.00 | 7.02   | 0.00    |
| Treated | Central tooth Stylus    | 37 | -6.83  | 100.00  | 11.27   | 50.00   | -6.12  | 0.00    |
| Treated | Lateral tooth I Cusp    | 37 | 2.64   | 0.00    | 0.00    | 0.00    | -1.51  | 0.00    |
| Treated | Lateral tooth I Stylus  | 37 | 1.21   | 0.00    | 0.00    | 0.00    | 1.20   | 0.00    |
| Treated | Lateral tooth II Basis  | 37 | 8.35   | -5.63   | 33.33   | 17.57   | 0.41   | -6.25   |
| Treated | Lateral tooth II Cusp   | 37 | -3.83  | -3.00   | 0.00    | -2.99   | 1.86   | 0.00    |
| Treated | Lateral tooth II Stylus | 37 | 1.76   | 3.23    | -5.04   | 2.68    | 1.78   | 100.00  |
| Treated | Marginal tooth Basis    | 37 | 0.00   | 0.00    | 0.00    | -7.69   | 9.96   | -50.00  |
| Treated | Marginal tooth Cusp     | 37 | 3.71   | 0.00    | 0.00    | 0.00    | 3.35   | 0.00    |
| Treated | Marginal tooth Stylus   | 37 | 1.11   | 0.00    | -100.00 | -100.00 | 0.84   | 0.00    |
| Treated | Central tooth Cusp      | 38 | -1.61  | 0.00    | 0.00    | 0.00    | -1.61  | 0.00    |
| Treated | Central tooth Stylus    | 38 | 1.55   | -100.00 | -35.21  | -78.57  | 1.06   | -20.00  |
| Treated | Lateral tooth I Cusp    | 38 | -3.40  | 0.00    | 0.00    | 0.00    | -77.88 | 0.00    |
| Treated | Lateral tooth I Stylus  | 38 | 1.41   | 0.00    | 0.00    | 0.00    | 1.41   | 0.00    |
| Treated | Lateral tooth II Basis  | 38 | -9.46  | 4.23    | 66.67   | 52.70   | 5.98   | 0.00    |
| Treated | Lateral tooth II Cusp   | 38 | 2.25   | 14.95   | 5.00    | 15.06   | 2.71   | 50.00   |
| Treated | Lateral tooth II Stylus | 38 | 3.05   | -0.78   | 0.00    | -1.02   | 3.05   | -100.00 |
| Treated | Marginal tooth Basis    | 38 | -9.06  | 0.00    | 100.00  | 92.31   | 10.08  | -50.00  |
| Treated | Marginal tooth Cusp     | 38 | -2.66  | 0.00    | 0.00    | 0.00    | -3.05  | 0.00    |
| Treated | Marginal tooth Stylus   | 38 | 1.21   | 53.57   | 0.00    | 42.86   | 0.85   | 0.00    |

### 3. Correlation coefficients:

**Supplementary Table 13.** For all tooth types together (treated and native), correlations, estimated by row-wise method, between the parameters hardness, Young's modulus, Na, Mg, Si, P, S, Cl, K, Ca, and Fe are shown.

|                      | Hardness, GPa | Young's modulus, GPa | Na, %   | Mg, %   | Si, %   | P, %    | S, %    | Cl, %   | K, %    | Ca, %  | Fe, %   |
|----------------------|---------------|----------------------|---------|---------|---------|---------|---------|---------|---------|--------|---------|
| Hardness, GPa        | 1.0000        | 0.9912               | 0.1242  | 0.2038  | 0.0651  | 0.2476  | 0.0273  | -0.0231 | 0.0695  | 0.6841 | 0.7575  |
| Young's modulus, GPa | 0.9912        | 1.0000               | 0.1346  | 0.2100  | 0.0687  | 0.2552  | 0.0369  | -0.0206 | 0.0703  | 0.6973 | 0.7013  |
| Na, %                | 0.1242        | 0.1346               | 1.0000  | 0.2753  | 0.1849  | 0.2991  | -0.0013 | -0.0085 | 0.1174  | 0.1381 | 0.1531  |
| Mg, %                | 0.2038        | 0.2100               | 0.2753  | 1.0000  | 0.1053  | 0.3242  | 0.0044  | -0.0107 | 0.1086  | 0.2329 | 0.1773  |
| Si, %                | 0.0651        | 0.0687               | 0.1849  | 0.1053  | 1.0000  | 0.1437  | -0.0044 | -0.0057 | 0.1159  | 0.0883 | 0.0727  |
| P, %                 | 0.2476        | 0.2552               | 0.2991  | 0.3242  | 0.1437  | 1.0000  | 0.0592  | -0.0108 | 0.1048  | 0.3006 | 0.2543  |
| S, %                 | 0.0273        | 0.0369               | -0.0013 | 0.0044  | -0.0044 | 0.0592  | 1.0000  | 0.0042  | -0.0045 | 0.0541 | -0.0092 |
| Cl, %                | -0.0231       | -0.0206              | -0.0085 | -0.0107 | -0.0057 | -0.0108 | 0.0042  | 1.0000  | -0.0063 | 0.0453 | -0.0268 |
| K, %                 | 0.0695        | 0.0703               | 0.1174  | 0.1086  | 0.1159  | 0.1048  | -0.0045 | -0.0063 | 1.0000  | 0.0628 | 0.0526  |
| Ca, %                | 0.6841        | 0.6973               | 0.1381  | 0.2329  | 0.0883  | 0.3006  | 0.0541  | 0.0453  | 0.0628  | 1.0000 | 0.4221  |
| Fe, %                | 0.7575        | 0.7013               | 0.1531  | 0.1773  | 0.0727  | 0.2543  | -0.0092 | -0.0268 | 0.0526  | 0.4221 | 1.0000  |

**Supplementary Table 14.** For all native tooth types together, correlations, estimated by row-wise method, between the parameters hardness, Young's modulus, Na, Mg, Si, P, S, Cl, K, Ca, and Fe are shown.

|                      | Hardness, GPa | Young's modulus, GPa | Na, %   | Mg, %   | Si, %   | P, %    | S, %    | Cl, %   | K, %    | Ca, %   | Fe, %   |
|----------------------|---------------|----------------------|---------|---------|---------|---------|---------|---------|---------|---------|---------|
| Hardness, GPa        | 1.0000        | 0.9909               | 0.1428  | 0.2517  | 0.0817  | 0.3005  | -0.0045 | -0.0385 | 0.0806  | 0.7076  | 0.6953  |
| Young's modulus, GPa | 0.9909        | 1.0000               | 0.1509  | 0.2516  | 0.0828  | 0.3021  | -0.0015 | -0.0385 | 0.0805  | 0.6889  | 0.6862  |
| Na, %                | 0.1428        | 0.1509               | 1.0000  | 0.2728  | 0.1910  | 0.2929  | -0.0160 | -0.0150 | 0.1215  | 0.1139  | 0.2280  |
| Mg, %                | 0.2517        | 0.2516               | 0.2728  | 1.0000  | 0.1072  | 0.3199  | -0.0135 | -0.0187 | 0.1128  | 0.2127  | 0.2694  |
| Si, %                | 0.0817        | 0.0828               | 0.1910  | 0.1072  | 1.0000  | 0.1460  | -0.0135 | -0.0097 | 0.1269  | 0.0789  | 0.1161  |
| P, %                 | 0.3005        | 0.3021               | 0.2929  | 0.3199  | 0.1460  | 1.0000  | 0.0403  | -0.0198 | 0.1069  | 0.2783  | 0.3807  |
| S, %                 | -0.0045       | -0.0015              | -0.0160 | -0.0135 | -0.0135 | 0.0403  | 1.0000  | -0.0062 | -0.0115 | -0.0137 | -0.0068 |
| Cl, %                | -0.0385       | -0.0385              | -0.0150 | -0.0187 | -0.0097 | -0.0198 | -0.0062 | 1.0000  | -0.0093 | 0.0235  | -0.0317 |
| K, %                 | 0.0806        | 0.0805               | 0.1215  | 0.1128  | 0.1269  | 0.1069  | -0.0115 | -0.0093 | 1.0000  | 0.0555  | 0.0792  |
| Ca, %                | 0.7076        | 0.6889               | 0.1139  | 0.2127  | 0.0789  | 0.2783  | -0.0137 | 0.0235  | 0.0555  | 1.0000  | 0.6794  |
| Fe, %                | 0.6953        | 0.6862               | 0.2280  | 0.2694  | 0.1161  | 0.3807  | -0.0068 | -0.0317 | 0.0792  | 0.6794  | 1.0000  |

**Supplementary Table 15.** For all treated tooth types together, correlations, estimated by row-wise method, between the parameters hardness, Young's modulus, Na, Mg, Si, P, S, Cl, K, Ca, and Fe are shown.

|                      | Hardness, GPa | Young's modulus, GPa | Na, %   | Mg, %   | Si, %   | P, %    | S, %    | Cl, %   | K, %    | Ca, %   | Fe, %   |
|----------------------|---------------|----------------------|---------|---------|---------|---------|---------|---------|---------|---------|---------|
| Hardness, GPa        | 1.0000        | 0.9356               | 0.0170  | -0.0224 | -0.0157 | 0.0110  | -0.0202 | -0.0361 | 0.0238  | 0.0863  | 0.7718  |
| Young's modulus, GPa | 0.9356        | 1.0000               | 0.0107  | -0.0202 | -0.0150 | -0.0075 | -0.0223 | -0.0383 | 0.0183  | 0.0955  | 0.8511  |
| Na, %                | 0.0170        | 0.0107               | 1.0000  | -0.0006 | -0.0005 | -0.0008 | -0.0014 | -0.0016 | -0.0015 | -0.0055 | 0.0075  |
| Mg, %                | -0.0224       | -0.0202              | -0.0006 | 1.0000  | -0.0006 | -0.0008 | -0.0015 | -0.0017 | -0.0015 | -0.0019 | -0.0082 |
| Si, %                | -0.0157       | -0.0150              | -0.0005 | -0.0006 | 1.0000  | -0.0007 | -0.0013 | -0.0014 | -0.0013 | -0.0050 | -0.0076 |
| P, %                 | 0.0110        | -0.0075              | -0.0008 | -0.0008 | -0.0007 | 1.0000  | -0.0018 | -0.0020 | -0.0019 | -0.0070 | -0.0107 |
| S, %                 | -0.0202       | -0.0223              | -0.0014 | -0.0015 | -0.0013 | -0.0018 | 1.0000  | -0.0038 | -0.0035 | 0.0391  | -0.0196 |
| Cl, %                | -0.0361       | -0.0383              | -0.0016 | -0.0017 | -0.0014 | -0.0020 | -0.0038 | 1.0000  | -0.0039 | 0.0251  | -0.0212 |
| K, %                 | 0.0238        | 0.0183               | -0.0015 | -0.0015 | -0.0013 | -0.0019 | -0.0035 | -0.0039 | 1.0000  | -0.0111 | 0.0099  |
| Ca, %                | 0.0863        | 0.0955               | -0.0055 | -0.0019 | -0.0050 | -0.0070 | 0.0391  | 0.0251  | -0.0111 | 1.0000  | 0.1100  |
| Fe, %                | 0.7718        | 0.8511               | 0.0075  | -0.0082 | -0.0076 | -0.0107 | -0.0196 | -0.0212 | 0.0099  | 0.1100  | 1.0000  |

**Supplementary Table 16.** For all native central teeth, correlations, estimated by row-wise method, between the parameters hardness, Young's modulus, Na, Mg, Si, P, S, Cl, K, Ca, and Fe are shown.

|                      | Hardness, GPa | Young's modulus, GPa | Na, %  | Mg, %  | Si, %  | P, %   | S, %    | Cl, %   | K, %    | Ca, %   | Fe, %   |
|----------------------|---------------|----------------------|--------|--------|--------|--------|---------|---------|---------|---------|---------|
| Hardness, GPa        | 1.0000        | 0.9988               | 0.0000 | 0.0000 | 0.0000 | 0.0000 | -0.0781 | -0.0789 | 0.0713  | 0.3244  | -0.0043 |
| Young's modulus, GPa | 0.9988        | 1.0000               | 0.0000 | 0.0000 | 0.0000 | 0.0000 | -0.0789 | -0.0787 | 0.0700  | 0.3235  | -0.0054 |
| Na, %                | 0.0000        | 0.0000               | 1.0000 | 0.0000 | 0.0000 | 0.0000 | 0.0000  | 0.0000  | 0.0000  | 0.0000  | 0.0000  |
| Mg, %                | 0.0000        | 0.0000               | 0.0000 | 1.0000 | 0.0000 | 0.0000 | 0.0000  | 0.0000  | 0.0000  | 0.0000  | 0.0000  |
| Si, %                | 0.0000        | 0.0000               | 0.0000 | 0.0000 | 1.0000 | 0.0000 | 0.0000  | 0.0000  | 0.0000  | 0.0000  | 0.0000  |
| P, %                 | 0.0000        | 0.0000               | 0.0000 | 0.0000 | 0.0000 | 1.0000 | 0.0000  | 0.0000  | 0.0000  | 0.0000  | 0.0000  |
| S, %                 | -0.0781       | -0.0789              | 0.0000 | 0.0000 | 0.0000 | 0.0000 | 1.0000  | -0.0262 | -0.0218 | -0.0928 | 0.0204  |
| Cl, %                | -0.0789       | -0.0787              | 0.0000 | 0.0000 | 0.0000 | 0.0000 | -0.0262 | 1.0000  | -0.0088 | -0.0324 | 0.0125  |
| K, %                 | 0.0713        | 0.0700               | 0.0000 | 0.0000 | 0.0000 | 0.0000 | -0.0218 | -0.0088 | 1.0000  | -0.0422 | -0.0151 |
| Ca, %                | 0.3244        | 0.3235               | 0.0000 | 0.0000 | 0.0000 | 0.0000 | -0.0928 | -0.0324 | -0.0422 | 1.0000  | 0.0376  |
| Fe, %                | -0.0043       | -0.0054              | 0.0000 | 0.0000 | 0.0000 | 0.0000 | 0.0204  | 0.0125  | -0.0151 | 0.0376  | 1.0000  |

**Supplementary Table 17.** For all native lateral teeth I, correlations, estimated by row-wise method, between the parameters hardness, Young's modulus, Na, Mg, Si, P, S, Cl, K, Ca, and Fe are shown.

|                      | Hardness, GPa | Young's modulus, GPa | Na, %  | Mg, %  | Si, %   | P, %   | S, %    | Cl, %   | K, %   | Ca, %   | Fe, %   |
|----------------------|---------------|----------------------|--------|--------|---------|--------|---------|---------|--------|---------|---------|
| Hardness, GPa        | 1.0000        | 0.9988               | 0.0000 | 0.0000 | 0.0892  | 0.0000 | -0.1028 | -0.1500 | 0.0000 | 0.2784  | -0.1056 |
| Young's modulus, GPa | 0.9988        | 1.0000               | 0.0000 | 0.0000 | 0.0988  | 0.0000 | -0.0989 | -0.1491 | 0.0000 | 0.2716  | -0.1049 |
| Na, %                | 0.0000        | 0.0000               | 1.0000 | 0.0000 | 0.0000  | 0.0000 | 0.0000  | 0.0000  | 0.0000 | 0.0000  | 0.0000  |
| Mg, %                | 0.0000        | 0.0000               | 0.0000 | 1.0000 | 0.0000  | 0.0000 | 0.0000  | 0.0000  | 0.0000 | 0.0000  | 0.0000  |
| Si, %                | 0.0892        | 0.0988               | 0.0000 | 0.0000 | 1.0000  | 0.0000 | -0.0156 | -0.0099 | 0.0000 | 0.1612  | -0.0074 |
| P, %                 | 0.0000        | 0.0000               | 0.0000 | 0.0000 | 0.0000  | 1.0000 | 0.0000  | 0.0000  | 0.0000 | 0.0000  | 0.0000  |
| S, %                 | -0.1028       | -0.0989              | 0.0000 | 0.0000 | -0.0156 | 0.0000 | 1.0000  | 0.0298  | 0.0000 | -0.0729 | 0.0887  |
| Cl, %                | -0.1500       | -0.1491              | 0.0000 | 0.0000 | -0.0099 | 0.0000 | 0.0298  | 1.0000  | 0.0000 | -0.0643 | -0.0174 |
| K, %                 | 0.0000        | 0.0000               | 0.0000 | 0.0000 | 0.0000  | 0.0000 | 0.0000  | 0.0000  | 1.0000 | 0.0000  | 0.0000  |
| Ca, %                | 0.2784        | 0.2716               | 0.0000 | 0.0000 | 0.1612  | 0.0000 | -0.0729 | -0.0643 | 0.0000 | 1.0000  | -0.0481 |
| Fe, %                | -0.1056       | -0.1049              | 0.0000 | 0.0000 | -0.0074 | 0.0000 | 0.0887  | -0.0174 | 0.0000 | -0.0481 | 1.0000  |

**Supplementary Table 18.** For all native lateral teeth II, correlations, estimated by row-wise method, between the parameters hardness, Young's modulus, Na, Mg, Si, P, S, Cl, K, Ca, and Fe are shown.

|                      | Hardness, GPa | Young's modulus, GPa | Na, %   | Mg, %   | Si, %   | P, %    | S, %    | Cl, %   | K, %    | Ca, %  | Fe, %   |
|----------------------|---------------|----------------------|---------|---------|---------|---------|---------|---------|---------|--------|---------|
| Hardness, GPa        | 1.0000        | 0.9853               | 0.0982  | 0.2167  | 0.1402  | 0.2936  | 0.0558  | -0.0528 | 0.0989  | 0.7312 | 0.7867  |
| Young's modulus, GPa | 0.9853        | 1.0000               | 0.1191  | 0.2274  | 0.1433  | 0.3091  | 0.0693  | -0.0481 | 0.0997  | 0.7261 | 0.7988  |
| Na, %                | 0.0982        | 0.1191               | 1.0000  | 0.2475  | 0.2741  | 0.2758  | -0.0251 | -0.0265 | 0.1622  | 0.0064 | 0.1739  |
| Mg, %                | 0.2167        | 0.2274               | 0.2475  | 1.0000  | 0.1492  | 0.2914  | -0.0209 | -0.0349 | 0.1454  | 0.0967 | 0.1912  |
| Si, %                | 0.1402        | 0.1433               | 0.2741  | 0.1492  | 1.0000  | 0.2136  | -0.0065 | -0.0121 | 0.1221  | 0.1029 | 0.1697  |
| P, %                 | 0.2936        | 0.3091               | 0.2758  | 0.2914  | 0.2136  | 1.0000  | 0.1050  | -0.0373 | 0.1412  | 0.1916 | 0.3248  |
| S, %                 | 0.0558        | 0.0693               | -0.0251 | -0.0209 | -0.0065 | 0.1050  | 1.0000  | -0.0045 | -0.0112 | 0.0396 | 0.0037  |
| Cl, %                | -0.0528       | -0.0481              | -0.0265 | -0.0349 | -0.0121 | -0.0373 | -0.0045 | 1.0000  | -0.0157 | 0.0105 | -0.0708 |
| K, %                 | 0.0989        | 0.0997               | 0.1622  | 0.1454  | 0.1221  | 0.1412  | -0.0112 | -0.0157 | 1.0000  | 0.0430 | 0.0857  |
| Ca, %                | 0.7312        | 0.7261               | 0.0064  | 0.0967  | 0.1029  | 0.1916  | 0.0396  | 0.0105  | 0.0430  | 1.0000 | 0.6077  |
| Fe, %                | 0.7867        | 0.7988               | 0.1739  | 0.1912  | 0.1697  | 0.3248  | 0.0037  | -0.0708 | 0.0857  | 0.6077 | 1.0000  |



**Supplementary Table 19.** For all native marginal teeth, correlations, estimated by row-wise method, between the parameters hardness, Young's modulus, Na, Mg, Si, P, S, Cl, K, Ca, and Fe are shown.

|                      | Hardness, GPa | Young's modulus, GPa | Na, %   | Mg, %  | Si, %   | P, %    | S, %    | Cl, %   | K, %    | Ca, %   | Fe, %   |
|----------------------|---------------|----------------------|---------|--------|---------|---------|---------|---------|---------|---------|---------|
| Hardness, GPa        | 1.0000        | 0.9897               | -0.1001 | 0.0000 | -0.0371 | -0.0161 | 0.0203  | -0.0296 | -0.0162 | 0.2251  | -0.0968 |
| Young's modulus, GPa | 0.9897        | 1.0000               | -0.1046 | 0.0000 | -0.0386 | -0.0171 | 0.0182  | -0.0320 | -0.0127 | 0.2370  | -0.0928 |
| Na, %                | -0.1001       | -0.1046              | 1.0000  | 0.0000 | -0.0073 | -0.0044 | -0.0198 | -0.0107 | -0.0045 | -0.0401 | -0.0091 |
| Mg, %                | 0.0000        | 0.0000               | 0.0000  | 1.0000 | 0.0000  | 0.0000  | 0.0000  | 0.0000  | 0.0000  | 0.0000  | 0.0000  |
| Si, %                | -0.0371       | -0.0386              | -0.0073 | 0.0000 | 1.0000  | -0.0047 | -0.0210 | -0.0114 | 0.4424  | 0.0159  | -0.0096 |
| P, %                 | -0.0161       | -0.0171              | -0.0044 | 0.0000 | -0.0047 | 1.0000  | -0.0126 | -0.0068 | -0.0028 | -0.0255 | -0.0058 |
| S, %                 | 0.0203        | 0.0182               | -0.0198 | 0.0000 | -0.0210 | -0.0126 | 1.0000  | -0.0308 | -0.0128 | -0.0281 | -0.0208 |
| Cl, %                | -0.0296       | -0.0320              | -0.0107 | 0.0000 | -0.0114 | -0.0068 | -0.0308 | 1.0000  | -0.0070 | -0.0622 | -0.0141 |
| K, %                 | -0.0162       | -0.0127              | -0.0045 | 0.0000 | 0.4424  | -0.0028 | -0.0128 | -0.0070 | 1.0000  | 0.0383  | -0.0059 |
| Ca, %                | 0.2251        | 0.2370               | -0.0401 | 0.0000 | 0.0159  | -0.0255 | -0.0281 | -0.0622 | 0.0383  | 1.0000  | -0.0524 |
| Fe, %                | -0.0968       | -0.0928              | -0.0091 | 0.0000 | -0.0096 | -0.0058 | -0.0208 | -0.0141 | -0.0059 | -0.0524 | 1.0000  |

**Supplementary Table 20.** For all treated central teeth, correlations, estimated by row-wise method, between the parameters hardness, Young's modulus, Na, Mg, Si, P, S, Cl, K, Ca, and Fe are shown.

|                      | Hardness, GPa | Young's modulus, GPa | Na, %  | Mg, %   | Si, %  | P, %   | S, %    | Cl, %   | K, %    | Ca, %   | Fe, %   |
|----------------------|---------------|----------------------|--------|---------|--------|--------|---------|---------|---------|---------|---------|
| Hardness, GPa        | 1.0000        | 0.9974               | 0.0000 | -0.0549 | 0.0000 | 0.0000 | -0.0374 | 0.0438  | 0.0284  | 0.1179  | 0.0256  |
| Young's modulus, GPa | 0.9974        | 1.0000               | 0.0000 | -0.0536 | 0.0000 | 0.0000 | -0.0380 | 0.0530  | 0.0278  | 0.1357  | 0.0309  |
| Na, %                | 0.0000        | 0.0000               | 1.0000 | 0.0000  | 0.0000 | 0.0000 | 0.0000  | 0.0000  | 0.0000  | 0.0000  | 0.0000  |
| Mg, %                | -0.0549       | -0.0536              | 0.0000 | 1.0000  | 0.0000 | 0.0000 | -0.0051 | -0.0051 | -0.0069 | -0.0007 | 0.1015  |
| Si, %                | 0.0000        | 0.0000               | 0.0000 | 0.0000  | 1.0000 | 0.0000 | 0.0000  | 0.0000  | 0.0000  | 0.0000  | 0.0000  |
| P, %                 | 0.0000        | 0.0000               | 0.0000 | 0.0000  | 0.0000 | 1.0000 | 0.0000  | 0.0000  | 0.0000  | 0.0000  | 0.0000  |
| S, %                 | -0.0374       | -0.0380              | 0.0000 | -0.0051 | 0.0000 | 0.0000 | 1.0000  | -0.0044 | -0.0059 | -0.0152 | -0.0104 |
| Cl, %                | 0.0438        | 0.0530               | 0.0000 | -0.0051 | 0.0000 | 0.0000 | -0.0044 | 1.0000  | -0.0059 | -0.0152 | 0.2499  |
| K, %                 | 0.0284        | 0.0278               | 0.0000 | -0.0069 | 0.0000 | 0.0000 | -0.0059 | -0.0059 | 1.0000  | -0.0205 | -0.0140 |
| Ca, %                | 0.1179        | 0.1357               | 0.0000 | -0.0007 | 0.0000 | 0.0000 | -0.0152 | -0.0152 | -0.0205 | 1.0000  | 0.0179  |
| Fe, %                | 0.0256        | 0.0309               | 0.0000 | 0.1015  | 0.0000 | 0.0000 | -0.0104 | 0.2499  | -0.0140 | 0.0179  | 1.0000  |

**Supplementary Table 21.** For all treated lateral teeth I, correlations, estimated by row-wise method, between the parameters hardness, Young's modulus, Na, Mg, Si, P, S, Cl, K, Ca, and Fe are shown.

|                      | Hardness, GPa | Young's modulus, GPa | Na, %  | Mg, %  | Si, %  | P, %    | S, %    | Cl, %   | K, %   | Ca, %   | Fe, %   |
|----------------------|---------------|----------------------|--------|--------|--------|---------|---------|---------|--------|---------|---------|
| Hardness, GPa        | 1.0000        | 0.9932               | 0.0000 | 0.0000 | 0.0000 | -0.0174 | 0.0055  | -0.0923 | 0.0000 | -0.0063 | -0.0986 |
| Young's modulus, GPa | 0.9932        | 1.0000               | 0.0000 | 0.0000 | 0.0000 | -0.0132 | 0.0024  | -0.0918 | 0.0000 | -0.0143 | -0.1015 |
| Na, %                | 0.0000        | 0.0000               | 1.0000 | 0.0000 | 0.0000 | 0.0000  | 0.0000  | 0.0000  | 0.0000 | 0.0000  | 0.0000  |
| Mg, %                | 0.0000        | 0.0000               | 0.0000 | 1.0000 | 0.0000 | 0.0000  | 0.0000  | 0.0000  | 0.0000 | 0.0000  | 0.0000  |
| Si, %                | 0.0000        | 0.0000               | 0.0000 | 0.0000 | 1.0000 | 0.0000  | 0.0000  | 0.0000  | 0.0000 | 0.0000  | 0.0000  |
| P, %                 | -0.0174       | -0.0132              | 0.0000 | 0.0000 | 0.0000 | 1.0000  | -0.0037 | -0.0044 | 0.0000 | -0.0060 | -0.0053 |
| S, %                 | 0.0055        | 0.0024               | 0.0000 | 0.0000 | 0.0000 | -0.0037 | 1.0000  | -0.0074 | 0.0000 | 0.3068  | -0.0089 |
| Cl, %                | -0.0923       | -0.0918              | 0.0000 | 0.0000 | 0.0000 | -0.0044 | -0.0074 | 1.0000  | 0.0000 | -0.0121 | -0.0107 |
| K, %                 | 0.0000        | 0.0000               | 0.0000 | 0.0000 | 0.0000 | 0.0000  | 0.0000  | 0.0000  | 1.0000 | 0.0000  | 0.0000  |
| Ca, %                | -0.0063       | -0.0143              | 0.0000 | 0.0000 | 0.0000 | -0.0060 | 0.3068  | -0.0121 | 0.0000 | 1.0000  | -0.0146 |
| Fe, %                | -0.0986       | -0.1015              | 0.0000 | 0.0000 | 0.0000 | -0.0053 | -0.0089 | -0.0107 | 0.0000 | -0.0146 | 1.0000  |

**Supplementary Table 22.** For all treated lateral teeth II, correlations, estimated by row-wise method, between the parameters hardness, Young's modulus, Na, Mg, Si, P, S, Cl, K, Ca, and Fe are given.

|                      | Hardness, GPa | Young's modulus, GPa | Na, %   | Mg, %  | Si, %  | P, %    | S, %    | Cl, %   | K, %    | Ca, %   | Fe, %   |
|----------------------|---------------|----------------------|---------|--------|--------|---------|---------|---------|---------|---------|---------|
| Hardness, GPa        | 1.0000        | 0.9171               | -0.0004 | 0.0000 | 0.0000 | 0.0213  | -0.0475 | -0.0319 | 0.0301  | -0.0305 | 0.8184  |
| Young's modulus, GPa | 0.9171        | 1.0000               | -0.0047 | 0.0000 | 0.0000 | -0.0160 | -0.0543 | -0.0415 | 0.0140  | 0.0038  | 0.9436  |
| Na, %                | -0.0004       | -0.0047              | 1.0000  | 0.0000 | 0.0000 | -0.0016 | -0.0031 | -0.0032 | -0.0032 | -0.0129 | -0.0107 |
| Mg, %                | 0.0000        | 0.0000               | 0.0000  | 1.0000 | 0.0000 | 0.0000  | 0.0000  | 0.0000  | 0.0000  | 0.0000  | 0.0000  |
| Si, %                | 0.0000        | 0.0000               | 0.0000  | 0.0000 | 1.0000 | 0.0000  | 0.0000  | 0.0000  | 0.0000  | 0.0000  | 0.0000  |
| P, %                 | 0.0213        | -0.0160              | -0.0016 | 0.0000 | 0.0000 | 1.0000  | -0.0028 | -0.0029 | -0.0029 | -0.0116 | -0.0260 |
| S, %                 | -0.0475       | -0.0543              | -0.0031 | 0.0000 | 0.0000 | -0.0028 | 1.0000  | -0.0055 | -0.0055 | 0.0337  | -0.0488 |
| Cl, %                | -0.0319       | -0.0415              | -0.0032 | 0.0000 | 0.0000 | -0.0029 | -0.0055 | 1.0000  | -0.0057 | 0.0853  | -0.0479 |
| K, %                 | 0.0301        | 0.0140               | -0.0032 | 0.0000 | 0.0000 | -0.0029 | -0.0055 | -0.0057 | 1.0000  | -0.0190 | -0.0006 |
| Ca, %                | -0.0305       | 0.0038               | -0.0129 | 0.0000 | 0.0000 | -0.0116 | 0.0337  | 0.0853  | -0.0190 | 1.0000  | 0.0293  |
| Fe, %                | 0.8184        | 0.9436               | -0.0107 | 0.0000 | 0.0000 | -0.0260 | -0.0488 | -0.0479 | -0.0006 | 0.0293  | 1.0000  |

**Supplementary Table 23.** For all treated marginal teeth, correlations, estimated by row-wise method, between the parameters hardness, Young's modulus, Na, Mg, Si, P, S, Cl, K, Ca, and Fe are given.

|                      | Hardness, GPa | Young's modulus, GPa | Na, %  | Mg, %  | Si, %   | P, %   | S, %   | Cl, %   | K, %    | Ca, %   | Fe, %   |
|----------------------|---------------|----------------------|--------|--------|---------|--------|--------|---------|---------|---------|---------|
| Hardness, GPa        | 1.0000        | 0.9152               | 0.0000 | 0.0000 | -0.0327 | 0.0000 | 0.0000 | 0.0179  | -0.0264 | 0.1325  | -0.0928 |
| Young's modulus, GPa | 0.9152        | 1.0000               | 0.0000 | 0.0000 | -0.0337 | 0.0000 | 0.0000 | 0.0300  | -0.0057 | 0.1671  | -0.0886 |
| Na, %                | 0.0000        | 0.0000               | 1.0000 | 0.0000 | 0.0000  | 0.0000 | 0.0000 | 0.0000  | 0.0000  | 0.0000  | 0.0000  |
| Mg, %                | 0.0000        | 0.0000               | 0.0000 | 1.0000 | 0.0000  | 0.0000 | 0.0000 | 0.0000  | 0.0000  | 0.0000  | 0.0000  |
| Si, %                | -0.0327       | -0.0337              | 0.0000 | 0.0000 | 1.0000  | 0.0000 | 0.0000 | -0.0020 | -0.0019 | -0.0102 | -0.0041 |
| P, %                 | 0.0000        | 0.0000               | 0.0000 | 0.0000 | 0.0000  | 1.0000 | 0.0000 | 0.0000  | 0.0000  | 0.0000  | 0.0000  |
| S, %                 | 0.0000        | 0.0000               | 0.0000 | 0.0000 | 0.0000  | 0.0000 | 1.0000 | 0.0000  | 0.0000  | 0.0000  | 0.0000  |
| Cl, %                | 0.0179        | 0.0300               | 0.0000 | 0.0000 | -0.0020 | 0.0000 | 0.0000 | 1.0000  | -0.0027 | -0.0143 | -0.0058 |
| K, %                 | -0.0264       | -0.0057              | 0.0000 | 0.0000 | -0.0019 | 0.0000 | 0.0000 | -0.0027 | 1.0000  | -0.0136 | -0.0055 |
| Ca, %                | 0.1325        | 0.1671               | 0.0000 | 0.0000 | -0.0102 | 0.0000 | 0.0000 | -0.0143 | -0.0136 | 1.0000  | -0.0289 |
| Fe, %                | -0.0928       | -0.0886              | 0.0000 | 0.0000 | -0.0041 | 0.0000 | 0.0000 | -0.0058 | -0.0055 | -0.0289 | 1.0000  |

**Supplementary Table 24.** For all tooth types together (treated and native), correlations, estimated by row-wise method, between the parameters hardness, Young's modulus, Fe, Ca, dry breaking force (Bf), wet bf, dry breaking tress (Bs), and wet Bs are given.

|                      | Hardness, GPa | Young's modulus, GPa | Fe, %  | Ca, %  | Dry Bf, mN | Wet Bf, mN | Dry Bs, MPa | Wet Bs, MPa |
|----------------------|---------------|----------------------|--------|--------|------------|------------|-------------|-------------|
| Hardness, GPa        | 1.0000        | 0.9912               | 0.7575 | 0.6841 | 0.9022     | 0.7934     | 0.1620      | 0.5206      |
| Young's modulus, GPa | 0.9912        | 1.0000               | 0.7013 | 0.6973 | 0.9001     | 0.7600     | 0.0741      | 0.4301      |
| Fe, %                | 0.7575        | 0.7013               | 1.0000 | 0.5465 | 0.8039     | 0.9372     | 0.3448      | 0.8254      |
| Ca, %                | 0.6841        | 0.6973               | 0.5465 | 1.0000 | 0.7866     | 0.4695     | 0.0512      | 0.2845      |
| Dry Bf, mN           | 0.9022        | 0.9001               | 0.8039 | 0.7866 | 1.0000     | 0.7803     | 0.1361      | 0.5038      |
| Wet Bf, mN           | 0.7934        | 0.7600               | 0.9372 | 0.4695 | 0.7803     | 1.0000     | 0.0934      | 0.6900      |
| Dry Bs, MPa          | 0.1620        | 0.0741               | 0.3448 | 0.0512 | 0.1361     | 0.0934     | 1.0000      | 0.7419      |
| Wet Bs, MPa          | 0.5206        | 0.4301               | 0.8254 | 0.2845 | 0.5038     | 0.6900     | 0.7419      | 1.0000      |

**Supplementary Table 25.** For central teeth (native condition), correlations, estimated by row-wise method, between the parameters hardness, Young's modulus, Fe, Ca, dry and wet breaking force (Bf) are given.

|                      | Hardness, GPa | Young's modulus, GPa | Fe, %  | Ca, %  | Dry Bf, mN | Wet Bf, mN |
|----------------------|---------------|----------------------|--------|--------|------------|------------|
| Hardness, GPa        | 1.0000        | 1.0000               | 0.9853 | 0.9750 | 0.9991     | 0.9946     |
| Young's modulus, GPa | 1.0000        | 1.0000               | 0.9838 | 0.9730 | 0.9995     | 0.9936     |
| Fe, %                | 0.9853        | 0.9838               | 1.0000 | 0.9986 | 0.9773     | 0.9977     |
| Ca, %                | 0.9750        | 0.9730               | 0.9986 | 1.0000 | 0.9649     | 0.9928     |
| Dry Bf, mN           | 0.9991        | 0.9995               | 0.9773 | 0.9649 | 1.0000     | 0.9894     |
| Wet Bf, mN           | 0.9946        | 0.9936               | 0.9977 | 0.9928 | 0.9894     | 1.0000     |

**Supplementary Table 26.** For lateral teeth I (native condition), correlations, estimated by row-wise method, between the parameters hardness, Young's modulus, Fe, Ca, dry and wet breaking force (Bf) are given.

|                      | Hardness, GPa | Young's modulus, GPa | Fe, %  | Ca, %  | Dry Bf, mN | Wet Bf, mN |
|----------------------|---------------|----------------------|--------|--------|------------|------------|
| Hardness, GPa        | 1.0000        | 1.0000               | 0.4931 | 0.9914 | 0.9994     | 0.9999     |
| Young's modulus, GPa | 1.0000        | 1.0000               | 0.4911 | 0.9917 | 0.9995     | 0.9999     |
| Fe, %                | 0.4931        | 0.4911               | 1.0000 | 0.3752 | 0.4639     | 0.4783     |
| Ca, %                | 0.9914        | 0.9917               | 0.3752 | 1.0000 | 0.9952     | 0.9935     |
| Dry Bf, mN           | 0.9994        | 0.9995               | 0.4639 | 0.9952 | 1.0000     | 0.9999     |
| Wet Bf, mN           | 0.9999        | 0.9999               | 0.4783 | 0.9935 | 0.9999     | 1.0000     |

**Supplementary Table 27.** For lateral teeth II (native condition), correlations, estimated by row-wise method, between the parameters hardness, Young's modulus, Fe, Ca, dry breaking force (Bf), wet bf, dry breaking tress (Bs), and wet Bs are given.

|                      | Hardness, GPa | Young's modulus, GPa | Fe, %  | Ca, %  | Dry Bf, mN | Wet Bf, mN | Dry Bs, MPa | Wet Bs, MPa |
|----------------------|---------------|----------------------|--------|--------|------------|------------|-------------|-------------|
| Hardness, GPa        | 1.0000        | 1.0000               | 0.9496 | 0.9270 | 0.9683     | 0.9482     | 0.9866      | 0.9726      |
| Young's modulus, GPa | 1.0000        | 1.0000               | 0.9509 | 0.9255 | 0.9693     | 0.9495     | 0.9872      | 0.9735      |
| Fe, %                | 0.9496        | 0.9509               | 1.0000 | 0.7628 | 0.9978     | 1.0000     | 0.9880      | 0.9965      |
| Ca, %                | 0.9270        | 0.9255               | 0.7628 | 1.0000 | 0.8039     | 0.7599     | 0.8533      | 0.8144      |
| Dry Bf, mN           | 0.9683        | 0.9693               | 0.9978 | 0.8039 | 1.0000     | 0.9975     | 0.9961      | 0.9998      |
| Wet Bf, mN           | 0.9482        | 0.9495               | 1.0000 | 0.7599 | 0.9975     | 1.0000     | 0.9874      | 0.9961      |
| Dry Bs, MPa          | 0.9866        | 0.9872               | 0.9880 | 0.8533 | 0.9961     | 0.9874     | 1.0000      | 0.9975      |
| Wet Bs, MPa          | 0.9726        | 0.9735               | 0.9965 | 0.8144 | 0.9998     | 0.9961     | 0.9975      | 1.0000      |

**Supplementary Table 28.** For marginal teeth (native condition), correlations, estimated by row-wise method, between the parameters hardness, Young's modulus, Fe, Ca, dry breaking force (Bf), wet bf, dry breaking tress (Bs), and wet Bs are given.

|                      | Hardness, GPa | Young's modulus, GPa | Fe, %   | Ca, %   | Dry Bf, mN | Wet Bf, mN | Dry Bs, MPa | Wet Bs, MPa |
|----------------------|---------------|----------------------|---------|---------|------------|------------|-------------|-------------|
| Hardness, GPa        | 1.0000        | 0.9998               | -0.9745 | 0.8405  | 0.7391     | 0.9770     | 0.9979      | 0.7160      |
| Young's modulus, GPa | 0.9998        | 1.0000               | -0.9700 | 0.8508  | 0.7520     | 0.9809     | 0.9990      | 0.7293      |
| Fe, %                | -0.9745       | -0.9700              | 1.0000  | -0.6975 | -0.5691    | -0.9042    | -0.9579     | -0.5410     |
| Ca, %                | 0.8405        | 0.8508               | -0.6975 | 1.0000  | 0.9862     | 0.9367     | 0.8738      | 0.9800      |
| Dry Bf, mN           | 0.7391        | 0.7520               | -0.5691 | 0.9862  | 1.0000     | 0.8658     | 0.7812      | 0.9994      |
| Wet Bf, mN           | 0.9770        | 0.9809               | -0.9042 | 0.9367  | 0.8658     | 1.0000     | 0.9887      | 0.8484      |
| Dry Bs, MPa          | 0.9979        | 0.9990               | -0.9579 | 0.8738  | 0.7812     | 0.9887     | 1.0000      | 0.7597      |
| Wet Bs, MPa          | 0.7160        | 0.7293               | -0.5410 | 0.9800  | 0.9994     | 0.8484     | 0.7597      | 1.0000      |

**Supplementary Table 29.** For central teeth (treated condition), correlations, estimated by row-wise method, between the parameters hardness, Young's modulus, Fe, Ca, dry and wet breaking force (Bf) are given.

|                      | Hardness, GPa | Young's modulus, GPa | Fe, %   | Ca, %   | Dry Bf, mN | Wet Bf, mN |
|----------------------|---------------|----------------------|---------|---------|------------|------------|
| Hardness, GPa        | 1.0000        | 1.0000               | -0.9281 | 0.9817  | 0.9983     | 0.9549     |
| Young's modulus, GPa | 1.0000        | 1.0000               | -0.9263 | 0.9808  | 0.9980     | 0.9563     |
| Fe, %                | -0.9281       | -0.9263              | 1.0000  | -0.9820 | -0.9481    | -0.7756    |
| Ca, %                | 0.9817        | 0.9808               | -0.9820 | 1.0000  | 0.9911     | 0.8809     |
| Dry Bf, mN           | 0.9983        | 0.9980               | -0.9481 | 0.9911  | 1.0000     | 0.9360     |
| Wet Bf, mN           | 0.9549        | 0.9563               | -0.7756 | 0.8809  | 0.9360     | 1.0000     |

**Supplementary Table 30.** For lateral teeth I (treated condition), correlations, estimated by row-wise method, between the parameters hardness, Young's modulus, Fe, Ca, dry and wet breaking force (Bf) are given.

|                      | Hardness, GPa | Young's modulus, GPa | Fe, %   | Ca, %   | Dry Bf, mN | Wet Bf, mN |
|----------------------|---------------|----------------------|---------|---------|------------|------------|
| Hardness, GPa        | 1.0000        | 0.9999               | 0.4790  | -0.1653 | 0.9992     | 0.9988     |
| Young's modulus, GPa | 0.9999        | 1.0000               | 0.4890  | -0.1765 | 0.9996     | 0.9993     |
| Fe, %                | 0.4790        | 0.4890               | 1.0000  | -0.9449 | 0.5128     | 0.5207     |
| Ca, %                | -0.1653       | -0.1765              | -0.9449 | 1.0000  | -0.2035    | -0.2125    |
| Dry Bf, mN           | 0.9992        | 0.9996               | 0.5128  | -0.2035 | 1.0000     | 1.0000     |
| Wet Bf, mN           | 0.9988        | 0.9993               | 0.5207  | -0.2125 | 1.0000     | 1.0000     |

**Supplementary Table 31.** For lateral teeth II (treated condition), correlations, estimated by row-wise method, between the parameters hardness, Young's modulus, Fe, Ca, dry breaking force (Bf), wet bf, dry breaking tress (Bs), and wet Bs are given.

|                      | Hardness, GPa | Young's modulus, GPa | Fe, %  | Ca, %  | Dry Bf, mN | Wet Bf, mN | Dry Bs, MPa | Wet Bs, MPa |
|----------------------|---------------|----------------------|--------|--------|------------|------------|-------------|-------------|
| Hardness, GPa        | 1.0000        | 0.9874               | 0.9516 | 0.8612 | 0.9816     | 0.9486     | 0.9995      | 0.9524      |
| Young's modulus, GPa | 0.9874        | 1.0000               | 0.9883 | 0.9308 | 0.9995     | 0.9867     | 0.9918      | 0.9886      |
| Fe, %                | 0.9516        | 0.9883               | 1.0000 | 0.9757 | 0.9928     | 1.0000     | 0.9606      | 1.0000      |
| Ca, %                | 0.8612        | 0.9308               | 0.9757 | 1.0000 | 0.9424     | 0.9778     | 0.8765      | 0.9752      |
| Dry Bf, mN           | 0.9816        | 0.9995               | 0.9928 | 0.9424 | 1.0000     | 0.9916     | 0.9870      | 0.9931      |
| Wet Bf, mN           | 0.9486        | 0.9867               | 1.0000 | 0.9778 | 0.9916     | 1.0000     | 0.9579      | 0.9999      |
| Dry Bs, MPa          | 0.9995        | 0.9918               | 0.9606 | 0.8765 | 0.9870     | 0.9579     | 1.0000      | 0.9613      |
| Wet Bs, MPa          | 0.9524        | 0.9886               | 1.0000 | 0.9752 | 0.9931     | 0.9999     | 0.9613      | 1.0000      |

**Supplementary Table 32.** For marginal teeth (treated condition), correlations, estimated by row-wise method, between the parameters hardness, Young's modulus, Fe, Ca, dry breaking force (Bf), wet bf, dry breaking tress (Bs), and wet Bs are given.

|                      | Hardness, GPa | Young's modulus, GPa | Fe, %   | Ca, %   | Dry Bf, mN | Wet Bf, mN | Dry Bs, MPa | Wet Bs, MPa |
|----------------------|---------------|----------------------|---------|---------|------------|------------|-------------|-------------|
| Hardness, GPa        | 1.0000        | 0.9911               | -0.9984 | 0.9911  | 0.9096     | 0.9911     | 0.9156      | 0.9788      |
| Young's modulus, GPa | 0.9911        | 1.0000               | -0.9819 | 1.0000  | 0.9569     | 1.0000     | 0.9611      | 0.9426      |
| Fe, %                | -0.9984       | -0.9819              | 1.0000  | -0.9820 | -0.8846    | -0.9820    | -0.8913     | -0.9888     |
| Ca, %                | 0.9911        | 1.0000               | -0.9820 | 1.0000  | 0.9568     | 1.0000     | 0.9610      | 0.9428      |
| Dry Bf, mN           | 0.9096        | 0.9569               | -0.8846 | 0.9568  | 1.0000     | 0.9568     | 0.9999      | 0.8052      |
| Wet Bf, mN           | 0.9911        | 1.0000               | -0.9820 | 1.0000  | 0.9568     | 1.0000     | 0.9610      | 0.9428      |
| Dry Bs, MPa          | 0.9156        | 0.9611               | -0.8913 | 0.9610  | 0.9999     | 0.9610     | 1.0000      | 0.8137      |
| Wet Bs, MPa          | 0.9788        | 0.9426               | -0.9888 | 0.9428  | 0.8052     | 0.9428     | 0.8137      | 1.0000      |

#### 4. Relationships between parameters including results from ANOVA and PCA:

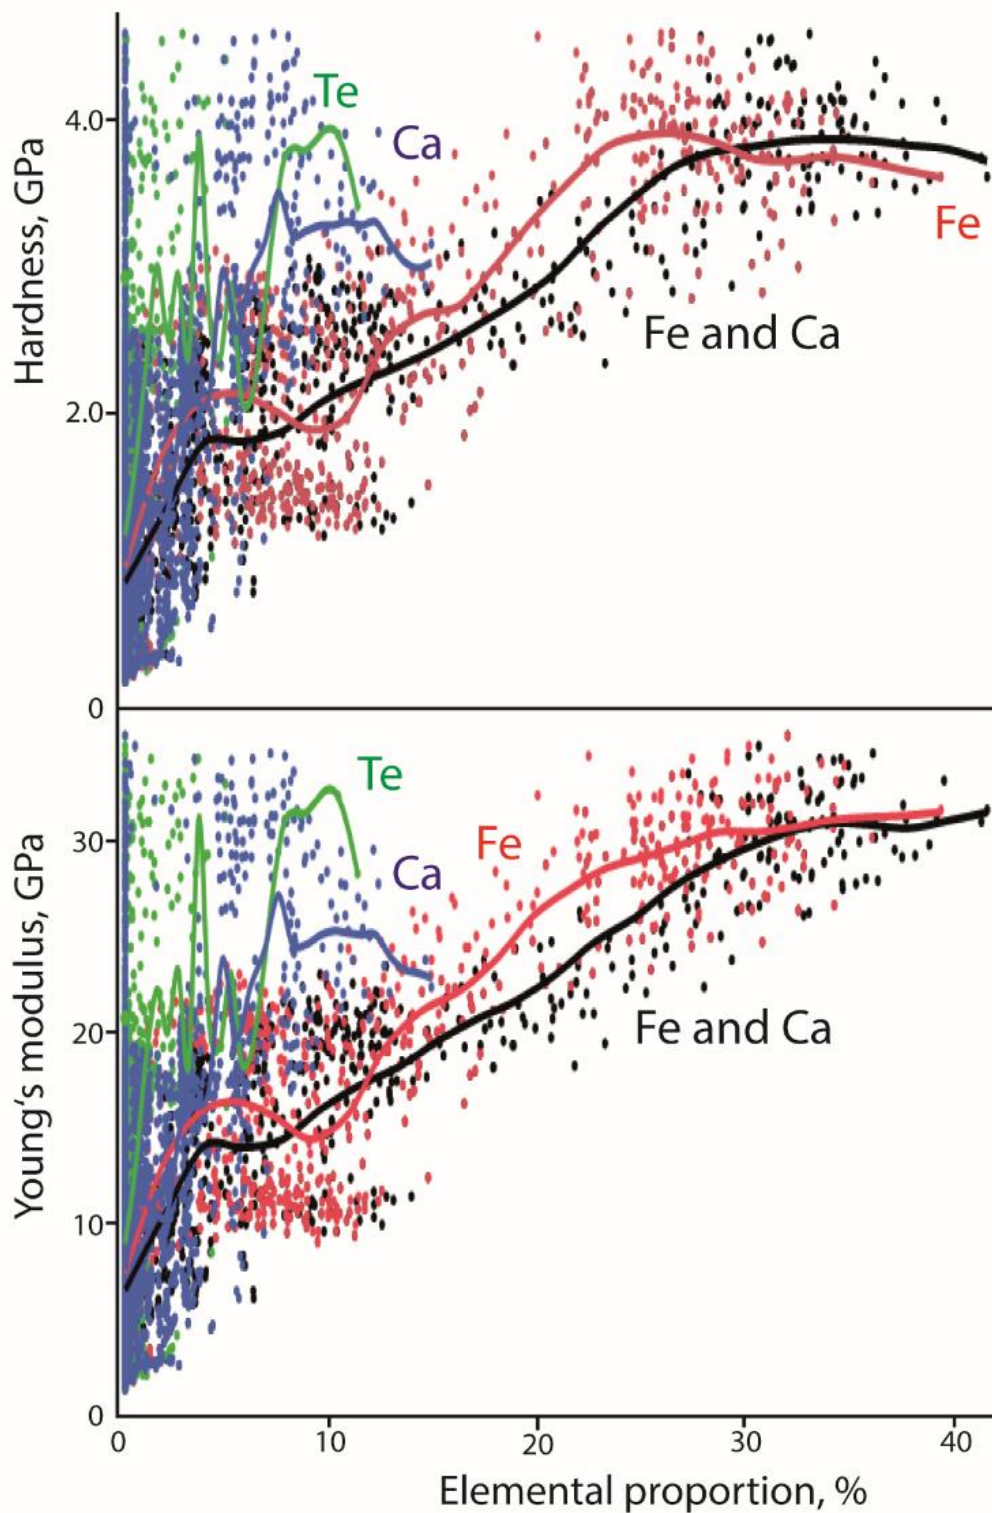

**Supplementary Figure 8.** Relationship between E, H, and the measured elemental proportions for all tooth types (treated and native).

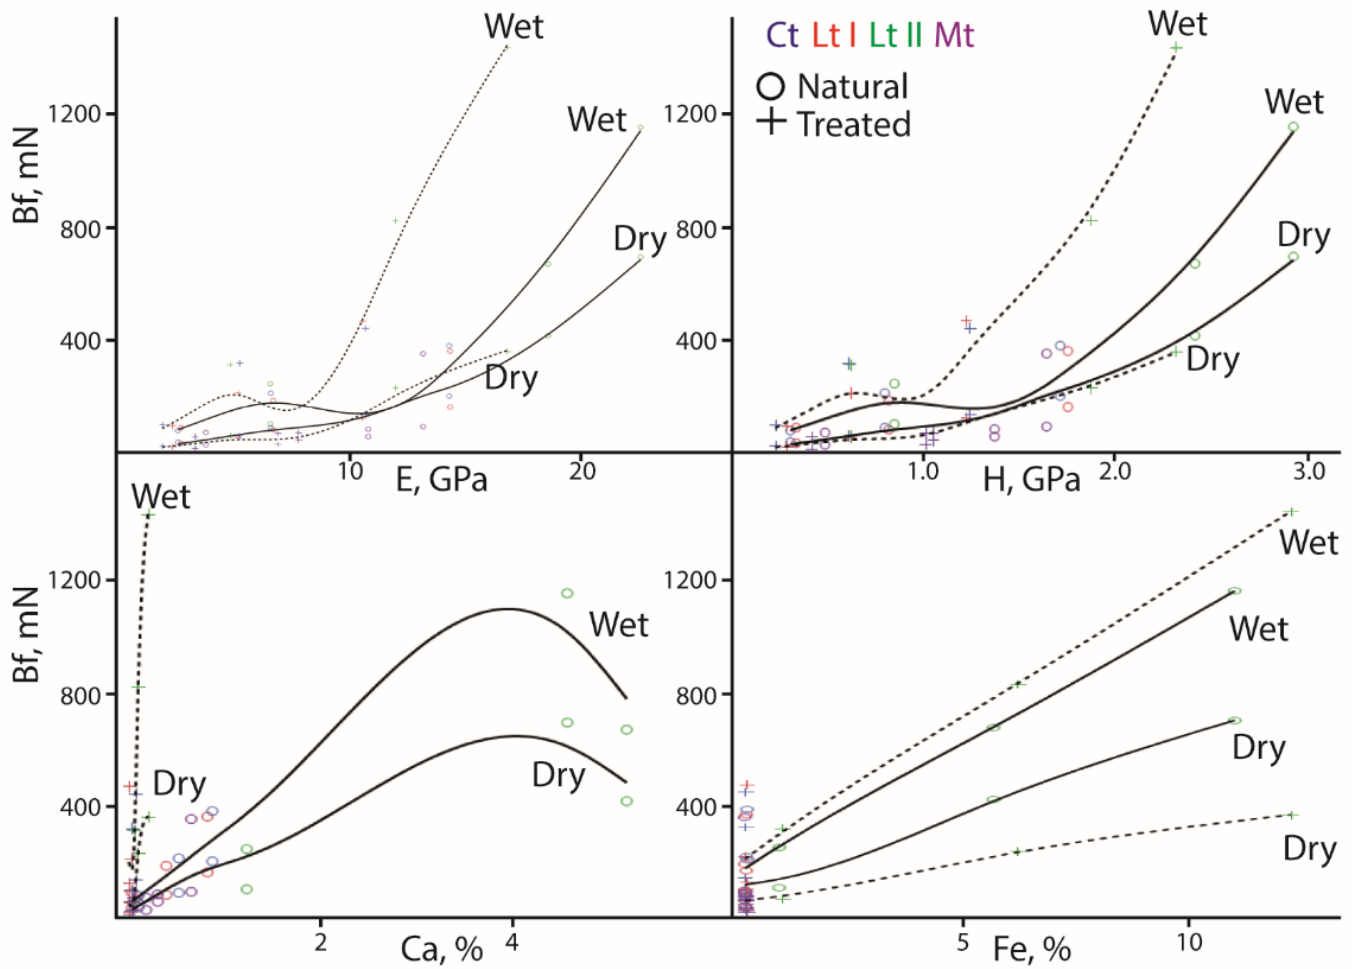

**Supplementary Figure 9.** Relationship between breaking force (tested under wet and dry condition) and Young's modulus (E), hardness (H), Ca, and Fe for treated and native teeth.

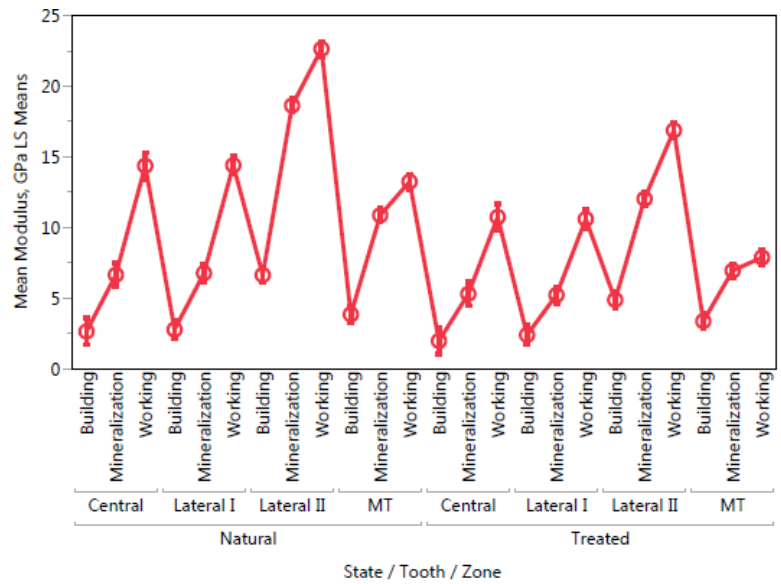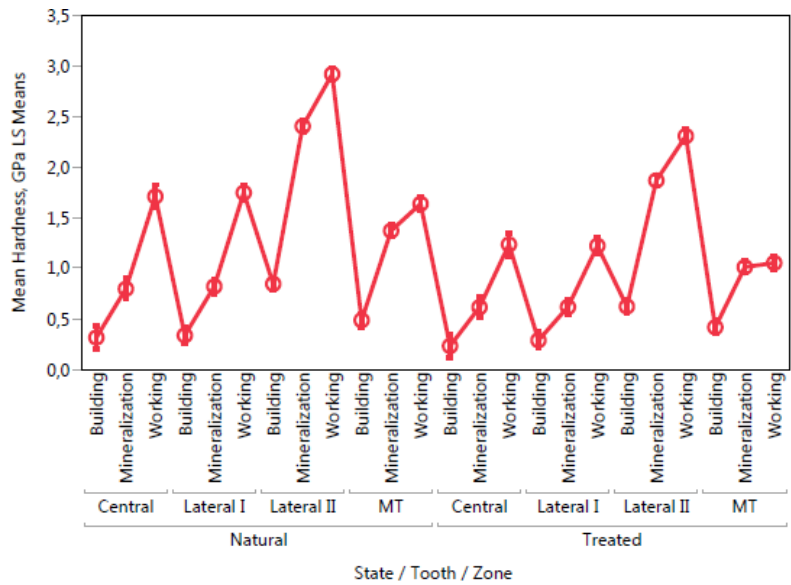

Supplementary Figure 10. Least square mean plots of 3-way ANOVA for E (above) and H (below).

Supplementary Table 33. 3-way ANOVA table and the effect tests with the interaction terms for Young's modulus.

| Analysis of Variance for Modulus |       |                |                |          |          |
|----------------------------------|-------|----------------|----------------|----------|----------|
| Source                           | DF    | Sum of Squares | Mean Square    | F Ratio  | Prob > F |
| Model                            | 23    | 132445.77      | 5758.51        | 363.9159 | <.0001*  |
| Error                            | 4120  | 65193.82       | 15.82          |          |          |
| C. Total                         | 4143  | 197639.59      |                |          |          |
| Effect Tests for Modulus         |       |                |                |          |          |
| Source                           | Nparm | DF             | Sum of Squares | F Ratio  | Prob > F |
| State                            | 1     | 1              | 7262.744       | 458.9776 | <.0001*  |
| Tooth                            | 3     | 3              | 36235.024      | 763.3049 | <.0001*  |
| Zone                             | 2     | 2              | 55229.683      | 1745.152 | <.0001*  |
| State*Tooth                      | 3     | 3              | 1348.904       | 28.4152  | <.0001*  |
| State*Zone                       | 2     | 2              | 1980.911       | 62.5930  | <.0001*  |
| Tooth*Zone                       | 6     | 6              | 8447.405       | 88.9739  | <.0001*  |
| State*Tooth*Zone                 | 6     | 6              | 568.054        | 5.9831.6 | <.0001*  |



**Supplementary Table 34.** 3-way ANOVA table and the effect tests with the interaction terms for hardness.

| Analysis of Variance for Hardness |      |                |             |          |          |
|-----------------------------------|------|----------------|-------------|----------|----------|
| Source                            | DF   | Sum of Squares | Mean Square | F Ratio  | Prob > F |
| Model                             | 23   | 2331.0694      | 101.351     | 424.0671 | <.0001*  |
| Error                             | 4120 | 984.6685       | 0.239       |          |          |
| C. Total                          | 4143 | 3315.7380      |             |          |          |

  

| Effect Tests for Hardness |       |    |                |          |          |
|---------------------------|-------|----|----------------|----------|----------|
| Source                    | Nparm | DF | Sum of Squares | F Ratio  | Prob > F |
| State                     | 1     | 1  | 88.80607       | 371.5778 | <.0001*  |
| Tooth                     | 3     | 3  | 781.86988      | 1090.487 | <.0001*  |
| Zone                      | 2     | 2  | 871.22416      | 1822.666 | <.0001*  |
| State*Tooth               | 3     | 3  | 7.11882        | 9.9287   | <.0001*  |
| State*Zone                | 2     | 2  | 25.55181       | 53.4563  | <.0001*  |
| Tooth*Zone                | 6     | 6  | 181.48954      | 126.5632 | <.0001*  |
| State*Tooth*Zone          | 6     | 6  | 2.28510        | 1.5935   | <.0001*  |

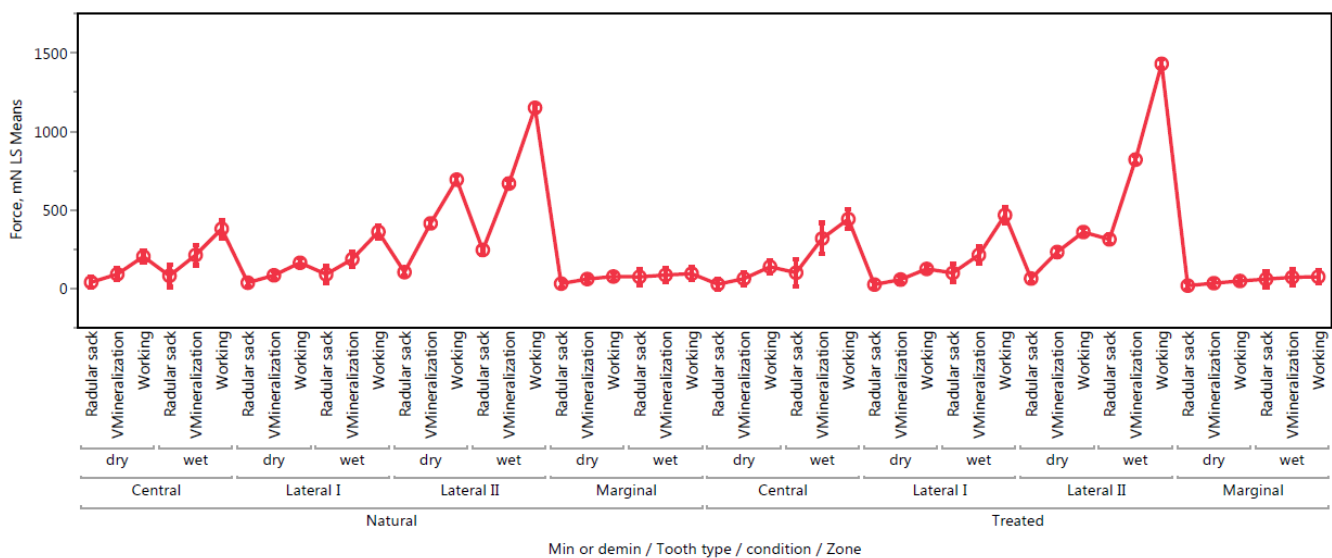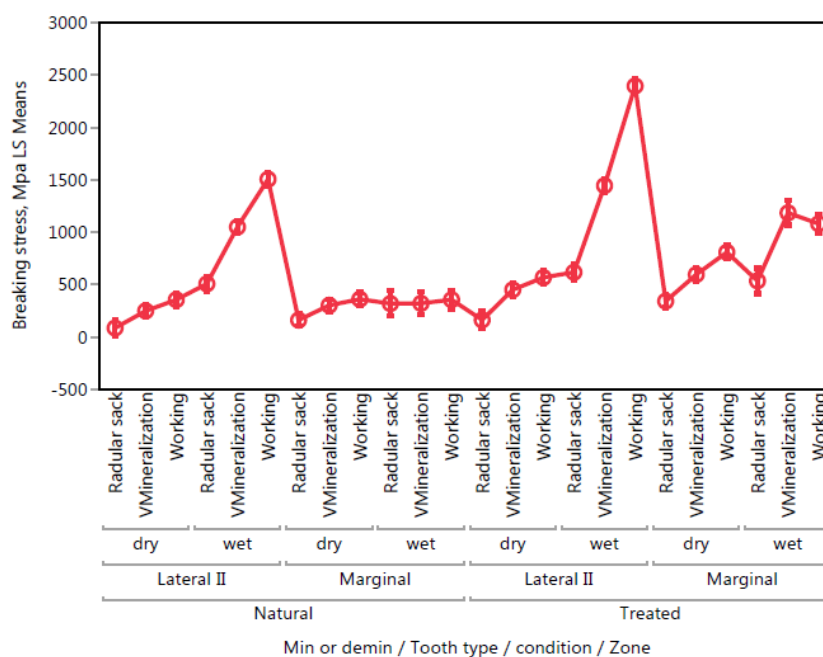

**Supplementary Figure 11.** Least square mean plots of 4-way ANOVA for breaking force (*above*) and stress (*below*).



**Supplementary Table 35.** 4-way ANOVA table and the effect tests with the interaction terms for breaking force.

| Analysis of Variance for breaking force |       |                |                |          |          |
|-----------------------------------------|-------|----------------|----------------|----------|----------|
| Source                                  | DF    | Sum of Squares | Mean Square    | F Ratio  | Prob > F |
| Model                                   | 47    | 145932684      | 3104951        | 396.8448 | <.0001*  |
| Error                                   | 1253  | 9803588        | 7824           |          |          |
| C. Total                                | 1300  | 155736273      |                |          |          |
| Effect Tests for breaking force         |       |                |                |          |          |
| Source                                  | Nparm | DF             | Sum of Squares | F Ratio  | Prob > F |
| State (native or treated)               | 1     | 1              | 265            | 0.0339   | <.0001*  |
| Tooth type                              | 3     | 3              | 47066355       | 2005.189 | <.0001*  |
| Condition (wet or dry)                  | 1     | 1              | 7955540        | 1016.800 | <.0001*  |
| Zone                                    | 2     | 2              | 12487644       | 798.0250 | <.0001*  |
| State*Tooth type                        | 3     | 3              | 37628          | 1.6031   | <.0001*  |
| State*Condition                         | 1     | 1              | 854514         | 109.2157 | <.0001*  |
| State*Zone                              | 2     | 2              | 1364           | 0.0872   | <.0001*  |
| Tooth type*Condition                    | 3     | 3              | 8706140        | 370.9116 | <.0001*  |
| Tooth type*Zone                         | 6     | 6              | 15759889       | 335.7128 | <.0001*  |
| Condition*Zone                          | 2     | 2              | 1920481        | 122.7287 | <.0001*  |
| State*Tooth type*Condition              | 3     | 3              | 1522538        | 64.8653  | <.0001*  |
| State*Tooth type*Zone                   | 6     | 6              | 48186          | 1.0265   | <.0001*  |
| State*Condition*Zone                    | 2     | 2              | 290605         | 18.5712  | <.0001*  |
| Tooth type*Condition*Zone               | 6     | 6              | 2680047        | 57.0896  | <.0001*  |
| State*Tooth type*Condition*Zone         | 6     | 6              | 537724         | 11.4544  | <.0001*  |

**Supplementary Table 36.** 4-way ANOVA table and the effect tests with the interaction terms for breaking stress.

| Analysis of Variance for breaking stress |       |                |                |                 |          |
|------------------------------------------|-------|----------------|----------------|-----------------|----------|
| Source                                   | DF    | Sum of Squares | Mean Square    | F Ratio         | Prob > F |
| Model                                    | 23    | 241531786      | 10501382       | 248.8659        | <.0001*  |
| Error                                    | 740   | 31225748       | 42196.957      |                 |          |
| C. Total                                 | 763   | 272757535      |                |                 |          |
| Effect Tests for breaking stress         |       |                |                |                 |          |
| Source                                   | Nparm | DF             | Sum of Squares | F Ratio         | Prob > F |
| State (native or treated)                | 1     | 1              | 22739261       | <b>538.8839</b> | <.0001*  |
| Tooth type                               | 1     | 1              | 9769365        | <b>231.5182</b> | <.0001*  |
| Condition (wet or dry)                   | 1     | 1              | 50475041       | <b>1196.177</b> | <.0001*  |
| Zone                                     | 2     | 2              | 34700390       | <b>411.1717</b> | <.0001*  |
| State*Tooth type                         | 1     | 1              | 755927         | <b>17.9143</b>  | <.0001*  |
| State*Condition                          | 1     | 1              | 3407958        | <b>80.7631</b>  | <.0001*  |
| State*Zone                               | 2     | 2              | 4544316        | <b>53.8465</b>  | <.0001*  |
| Tooth type*Condition                     | 1     | 1              | 20894659       | <b>495.1698</b> | <.0001*  |
| Tooth type*Zone                          | 2     | 2              | 8250334        | <b>97.7598</b>  | <.0001*  |
| Condition*Zone                           | 2     | 2              | 6393987        | <b>75.7636</b>  | <.0001*  |
| State*Tooth type*Condition               | 1     | 1              | 425            | <b>0.0101</b>   | <.0001*  |
| State*Tooth type*Zone                    | 2     | 2              | 447224         | <b>5.2992</b>   | 0.0052*  |
| State*Condition*Zone                     | 2     | 2              | 1288471        | <b>15.2673</b>  | <.0001*  |
| Tooth type*Condition*Zone                | 2     | 2              | 8384834        | <b>99.3535</b>  | <.0001*  |
| State*Tooth type*Condition*Zone          | 2     | 2              | 1087002        | <b>12.8801</b>  | <.0001*  |

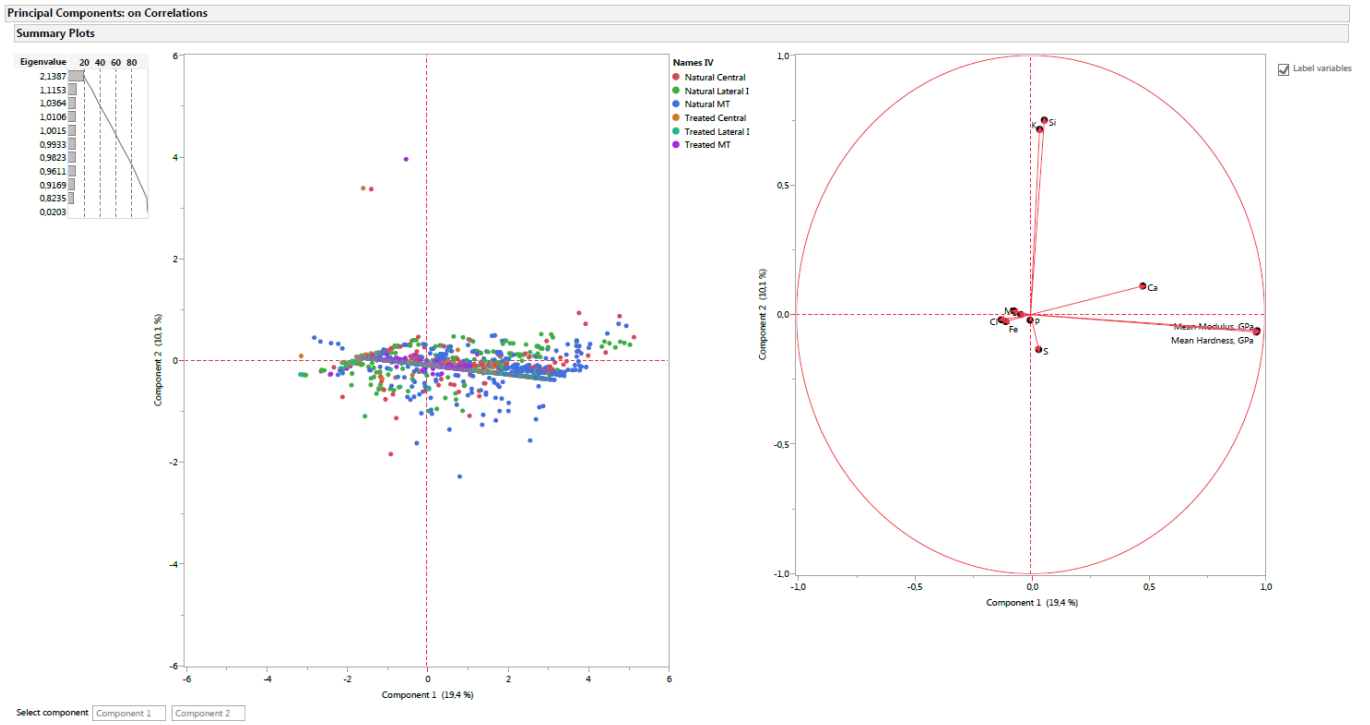

**Supplementary Figure 12.** PCA of all tooth types, except lateral tooth II. No clustering can be detected.
